# Supplementary material
Source: PubMed Central journal article supplement (PMC3479356)

# Supporting Information

## Contents

1. Supporting Information Table of Contents . . . . . S1
2.  $^1\text{H}$ -NMR and  $^{13}\text{C}$ -NMR for all reported compounds in the manuscript . . . . . S2-S65
3. HPLC traces for compounds **1, 12, 13, 14, 15, 16, 17, 18, 19** and **20** . . . . . S66-S75

CWII-147

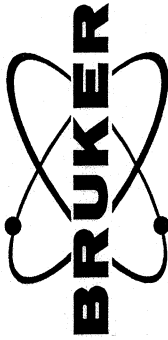

NAME CWII-147  
 EXPNO 12  
 PROCNO 1  
 Date\_ 20120419  
 Time\_ 16.55  
 INSTRUM spect  
 PROBHD 5 mm PABBO BB-  
 PULPROG zg30  
 TD 65536  
 SOLVENT CDCl3  
 NS 64  
 DS 2  
 SWH 8223.685 Hz  
 FIDRES 0.125483 Hz  
 AQ 3.9846387 sec  
 RG 4  
 DW 60.800 usec  
 DE 6.50 usec  
 TE 292.8 K  
 D1 1.00000000 sec  
 TD0 1

===== CHANNEL f1 =====  
 NUC1 1H  
 P1 14.00 usec  
 PL1 0.50 dB  
 PL1W 12.76071072 W  
 SF01 400.1324710 MHz  
 SI 32768  
 SF 400.1300101 MHz  
 WDW EM  
 SSB 0  
 LB 0.30 Hz  
 GB 0  
 PC 1.00

1.966  
 1.705  
 1.312  
 1.283

7.981  
 7.960  
 7.435  
 7.431  
 7.260  
 7.238  
 7.234  
 7.218  
 7.213  
 7.110  
 7.096  
 5.838  
 5.836  
 5.386  
 5.384

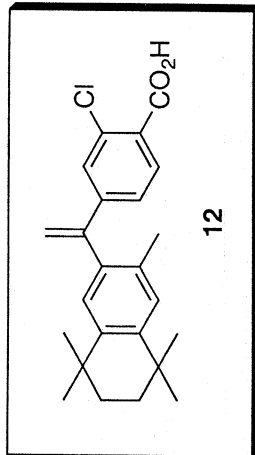

S2

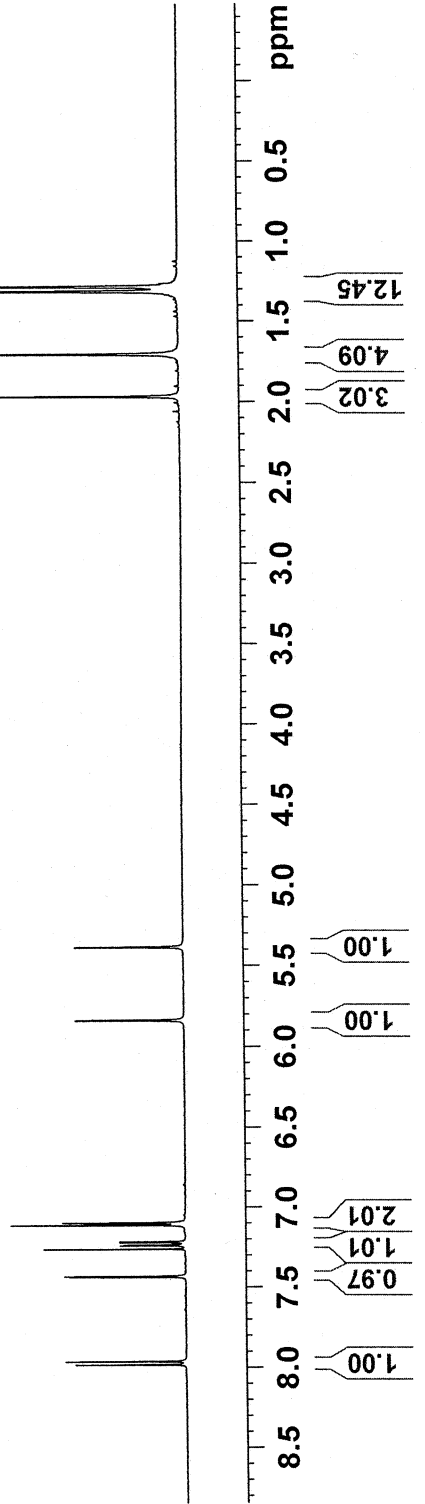

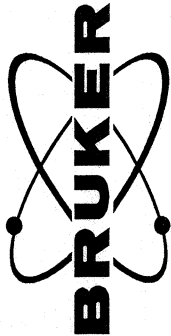

NAME CWII-147  
 EXPNO 13  
 PROCNO 1  
 Date\_ 20120419  
 Time\_ 17.22  
 INSTRUM spect  
 PROBD 5 mm PABBO BB-  
 PULPROG zgig30  
 TD 65536  
 SOLVENT CDC13  
 NS 419  
 DS 4  
 SWH 24038.461 Hz  
 FIDRES 0.366798 Hz  
 AQ 1.3631988 sec  
 RG 2050  
 DW 20.800 usec  
 DE 6.50 usec  
 TE 293.3 K  
 D1 2.00000000 sec  
 D11 0.03000000 sec  
 TD0 1

===== CHANNEL f1 =====  
 NUC1 13C  
 P1 8.50 usec  
 PL1 -2.10 dB  
 PL1W 60.29227829 W  
 SF01 100.6228298 MHz

===== CHANNEL f2 =====  
 CPDPRG2 waltz16  
 NUC2 1H  
 PCPD2 90.00 usec  
 PL2 -1.80 dB  
 PL12 17.28 dB  
 PL2W 21.67079544 W  
 PL12W 0.26783961 W  
 SFO2 400.1316005 MHz  
 SI 32768  
 SF 100.6127722 MHz  
 WDW EM  
 SSB 0  
 LB 1.00 Hz  
 GB 0  
 PC 1.40

19.99  
 31.85  
 31.91  
 33.89  
 34.02  
 35.11

76.69  
 77.00  
 77.32

118.26  
 124.95  
 126.54  
 128.05  
 128.21  
 129.34  
 132.60  
 132.69  
 135.02  
 137.10  
 142.51  
 144.71  
 146.81  
 147.86

170.46

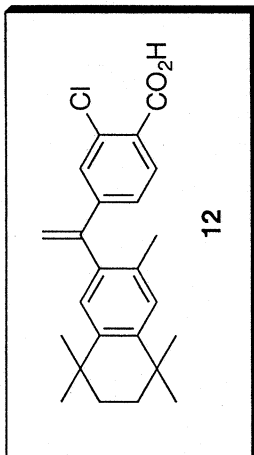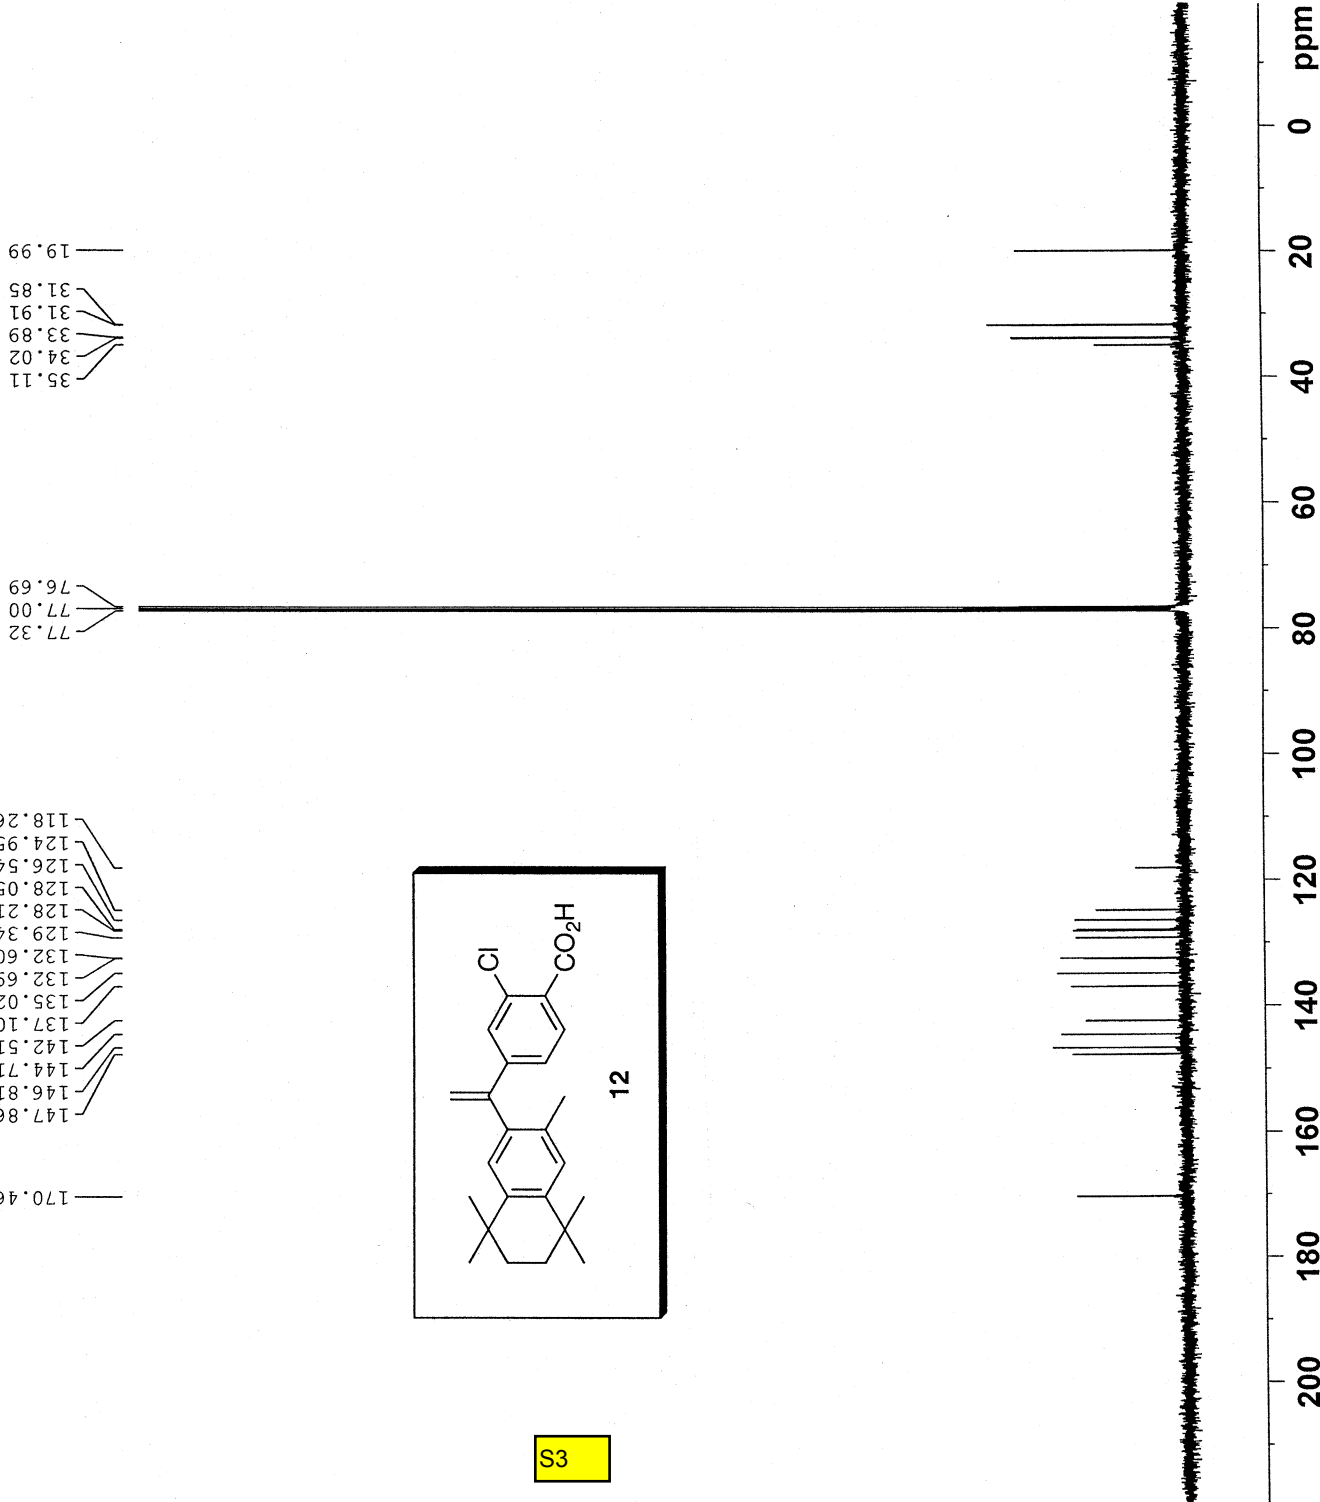

CWII-155

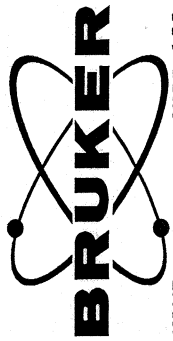

NAME CWII-155  
 EXPNO 5  
 PROCNO 1  
 Date\_ 20120419  
 Time\_ 22.12  
 INSTRUM spect  
 PROBHD 5 mm PABBO BB-  
 PULPROG zg30  
 TD 65536  
 SOLVENT CDCl3  
 NS 64  
 DS 2  
 SWH 8223.685 Hz  
 FIDRES 0.125483 Hz  
 AQ 3.9846387 sec  
 RG 4  
 DW 60.800 usec  
 DE 6.50 usec  
 TE 292.9 K  
 D1 1.00000000 sec  
 TD0 1

===== CHANNEL f1 =====  
 NUC1 1H  
 P1 14.00 usec  
 PL1 0.50 dB  
 PL1W 12.76071072 W  
 SFO1 400.1324710 MHz  
 SI 32768  
 SF 400.1300101 MHz  
 WDW EM  
 SSB 0  
 LB 0.30 Hz  
 GB 0  
 PC 1.00

1.221  
 1.322  
 1.702  
 2.374

7.234  
 7.260  
 7.276  
 7.739  
 7.743  
 7.759  
 7.763  
 7.924  
 7.928  
 8.080  
 8.100

11.335

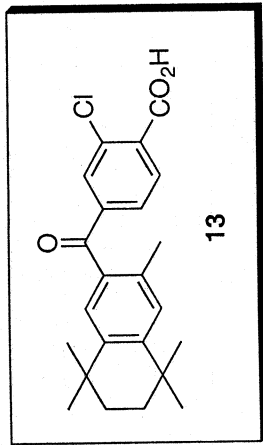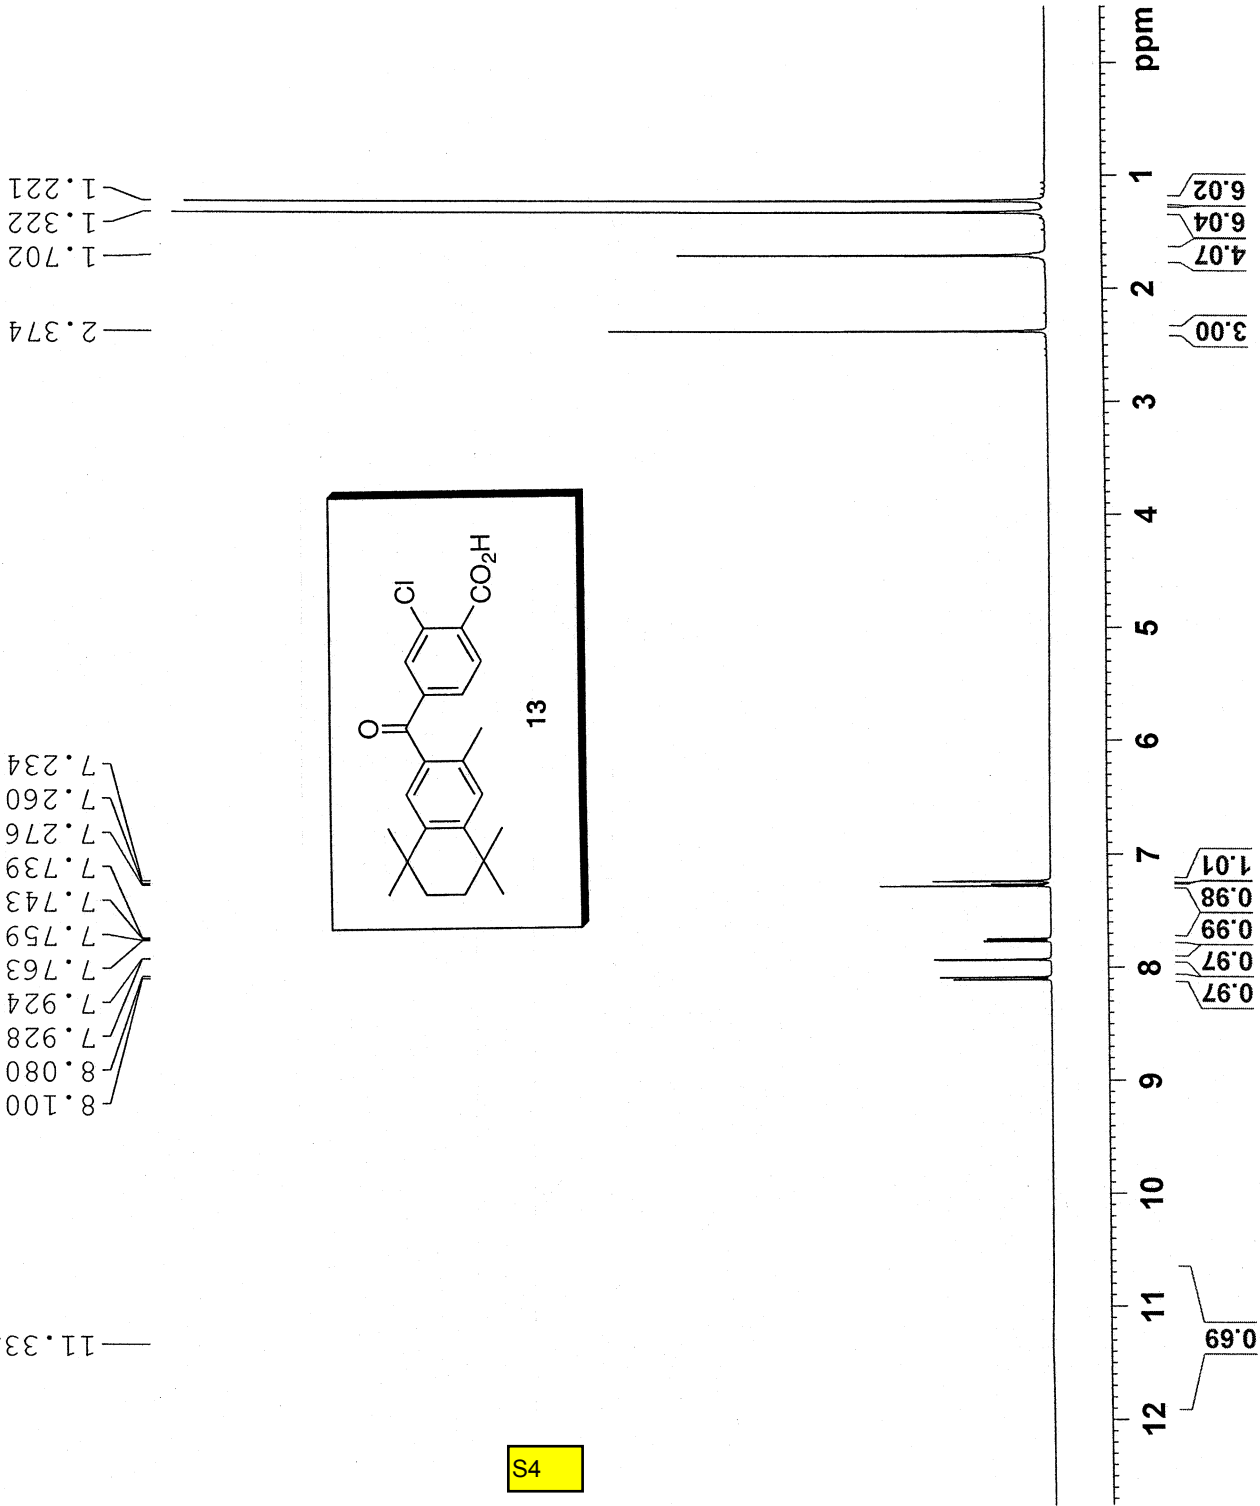

S4

CWII-155

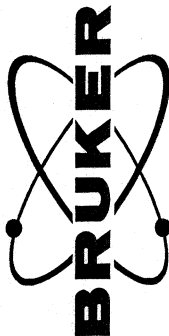

NAME CWII-155  
 EXPNO 6  
 PROCNO 1  
 Date\_ 20120419  
 Time\_ 22.42  
 INSTRUM spect  
 PROBHD 5 mm PABBO BB-  
 PULPROG zgpg30  
 TD 65536  
 SOLVENT CDCl3  
 NS 440  
 DS 4  
 SWH 24038.461 Hz  
 FIDRES 0.366798 Hz  
 AQC 1.3631988 sec  
 RG 2050  
 DW 20.800 usec  
 DE 6.50 usec  
 TE 293.3 K  
 D1 2.0000000 sec  
 D11 0.0300000 sec  
 TD0 1

===== CHANNEL f1 =====  
 NUC1 13C  
 P1 8.50 usec  
 PL1 -2.10 dB  
 PL1W 60.29227829 W  
 SFO1 100.6228298 MHz

===== CHANNEL f2 =====  
 CPDPRG2 waltz16  
 NUC2 1H  
 PCPD2 90.00 usec  
 PL2 -1.80 dB  
 PL12 17.28 dB  
 PL2W 21.67079544 W  
 PL12W 0.26783961 W  
 SFO2 400.1316005 MHz  
 SI 32768  
 SF 100.6127736 MHz  
 WDW EM  
 SSB 0  
 LB 1.00 Hz  
 GB 0  
 PC 1.40

20.13  
 31.56  
 31.67  
 33.90  
 34.41  
 34.76  
 34.82

76.68  
 77.00  
 77.32

127.94  
 128.75  
 129.72  
 131.57  
 132.22  
 132.73  
 133.75  
 134.83  
 134.94  
 142.10  
 142.69  
 149.01

170.25

196.04

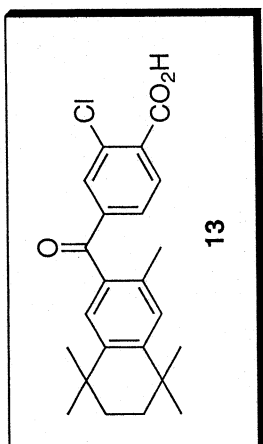

S5

200 180 160 140 120 100 80 60 40 20 0 ppm

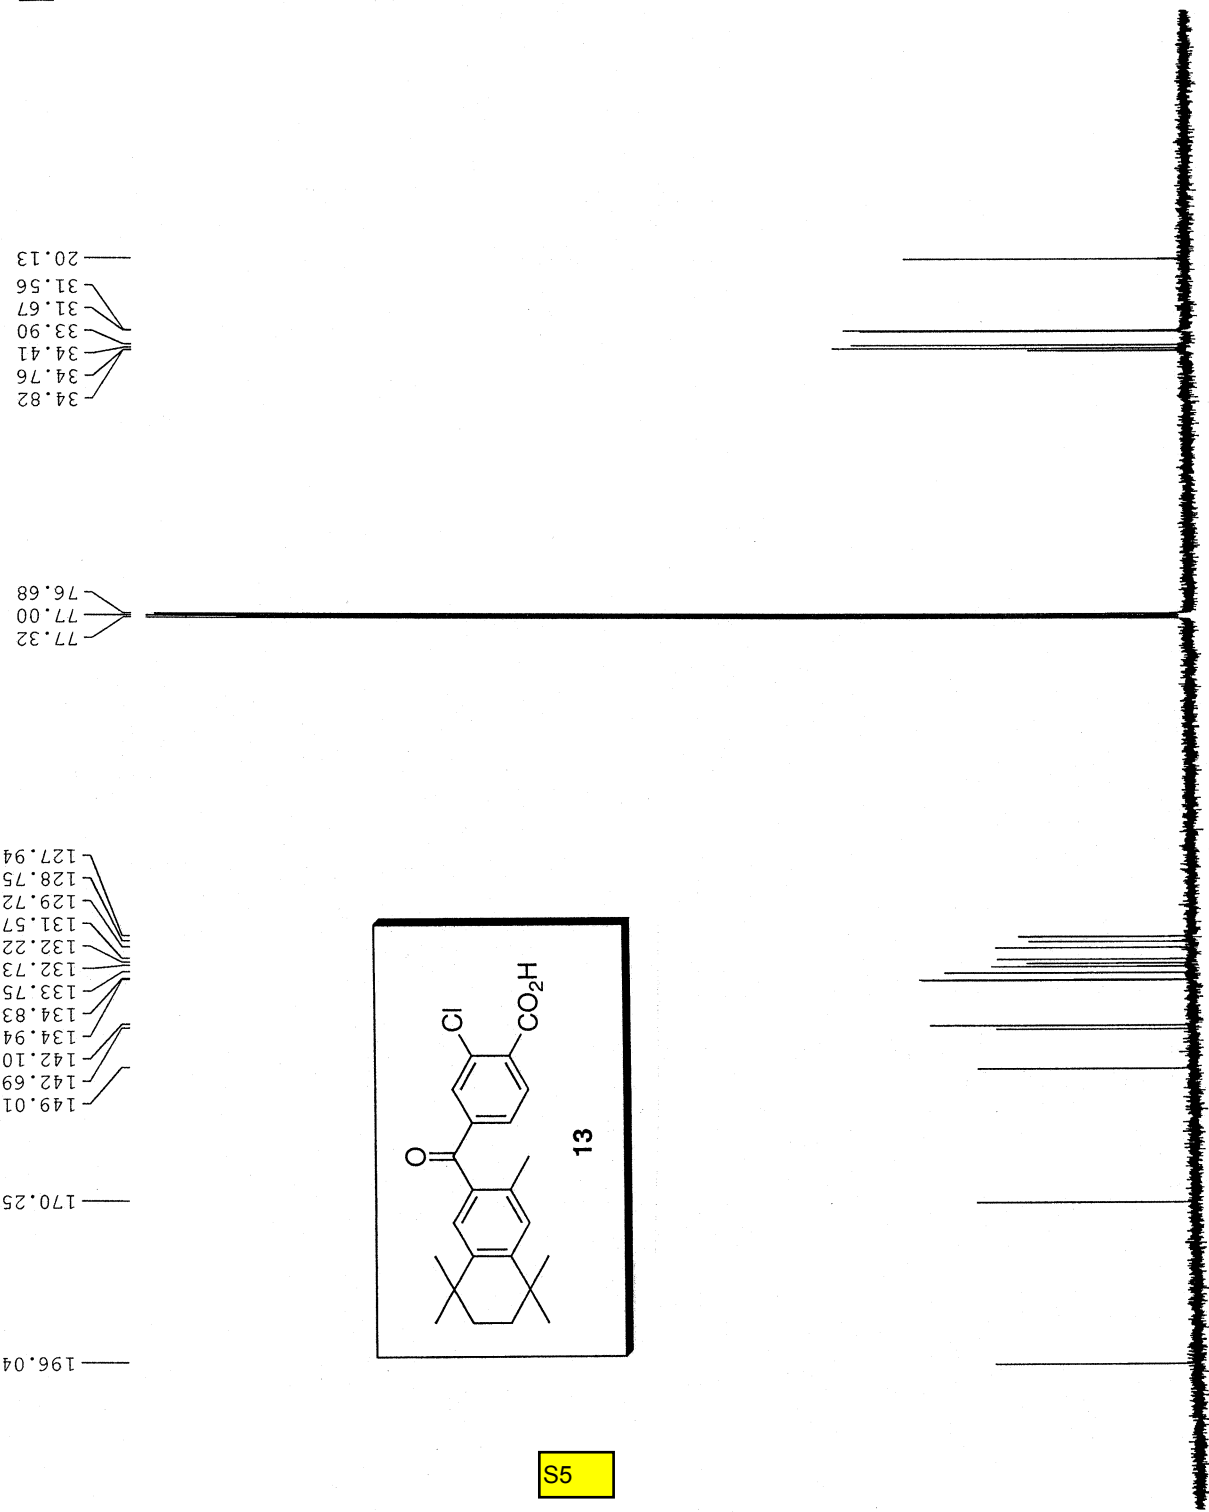

CWII-151

7.960  
7.940  
7.683  
7.679  
7.260  
7.256  
7.240  
7.236  
7.109  
7.097  
5.831  
5.829  
5.382  
5.380

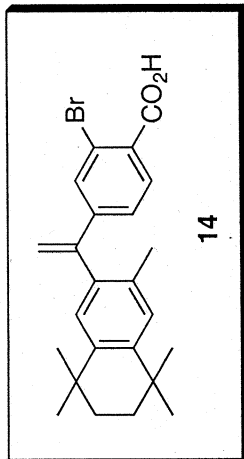

96

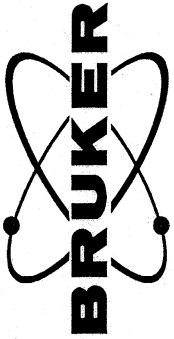

NAME CWII-151  
 EXPNO 5  
 PROCNO 1  
 Date\_ 20120419  
 Time\_ 17.33  
 INSTRUM spect  
 PROBHD 5 mm PABBO BB-  
 PULPROG zg30  
 65536  
 SOLVENT CDCl3  
 NS 64  
 DS 2  
 SWH 8223.685 Hz  
 FIDRES 0.125483 Hz  
 AQ 3.9846387 sec  
 RG 4  
 DW 60.800 usec  
 DE 6.50 usec  
 TE 292.9 K  
 D1 1.00000000 sec  
 TD0 1

==== CHANNEL f1 =====  
 NUC1 1H  
 P1 14.00 usec  
 PL1 0.50 dB  
 PL1W 12.76071072 W  
 SFO1 400.1324710 MHz  
 SI 32768  
 SF 400.1300101 MHz  
 EM  
 WDW 0  
 SSB 0  
 LB 0.30 Hz  
 GB 0  
 PC 1.00

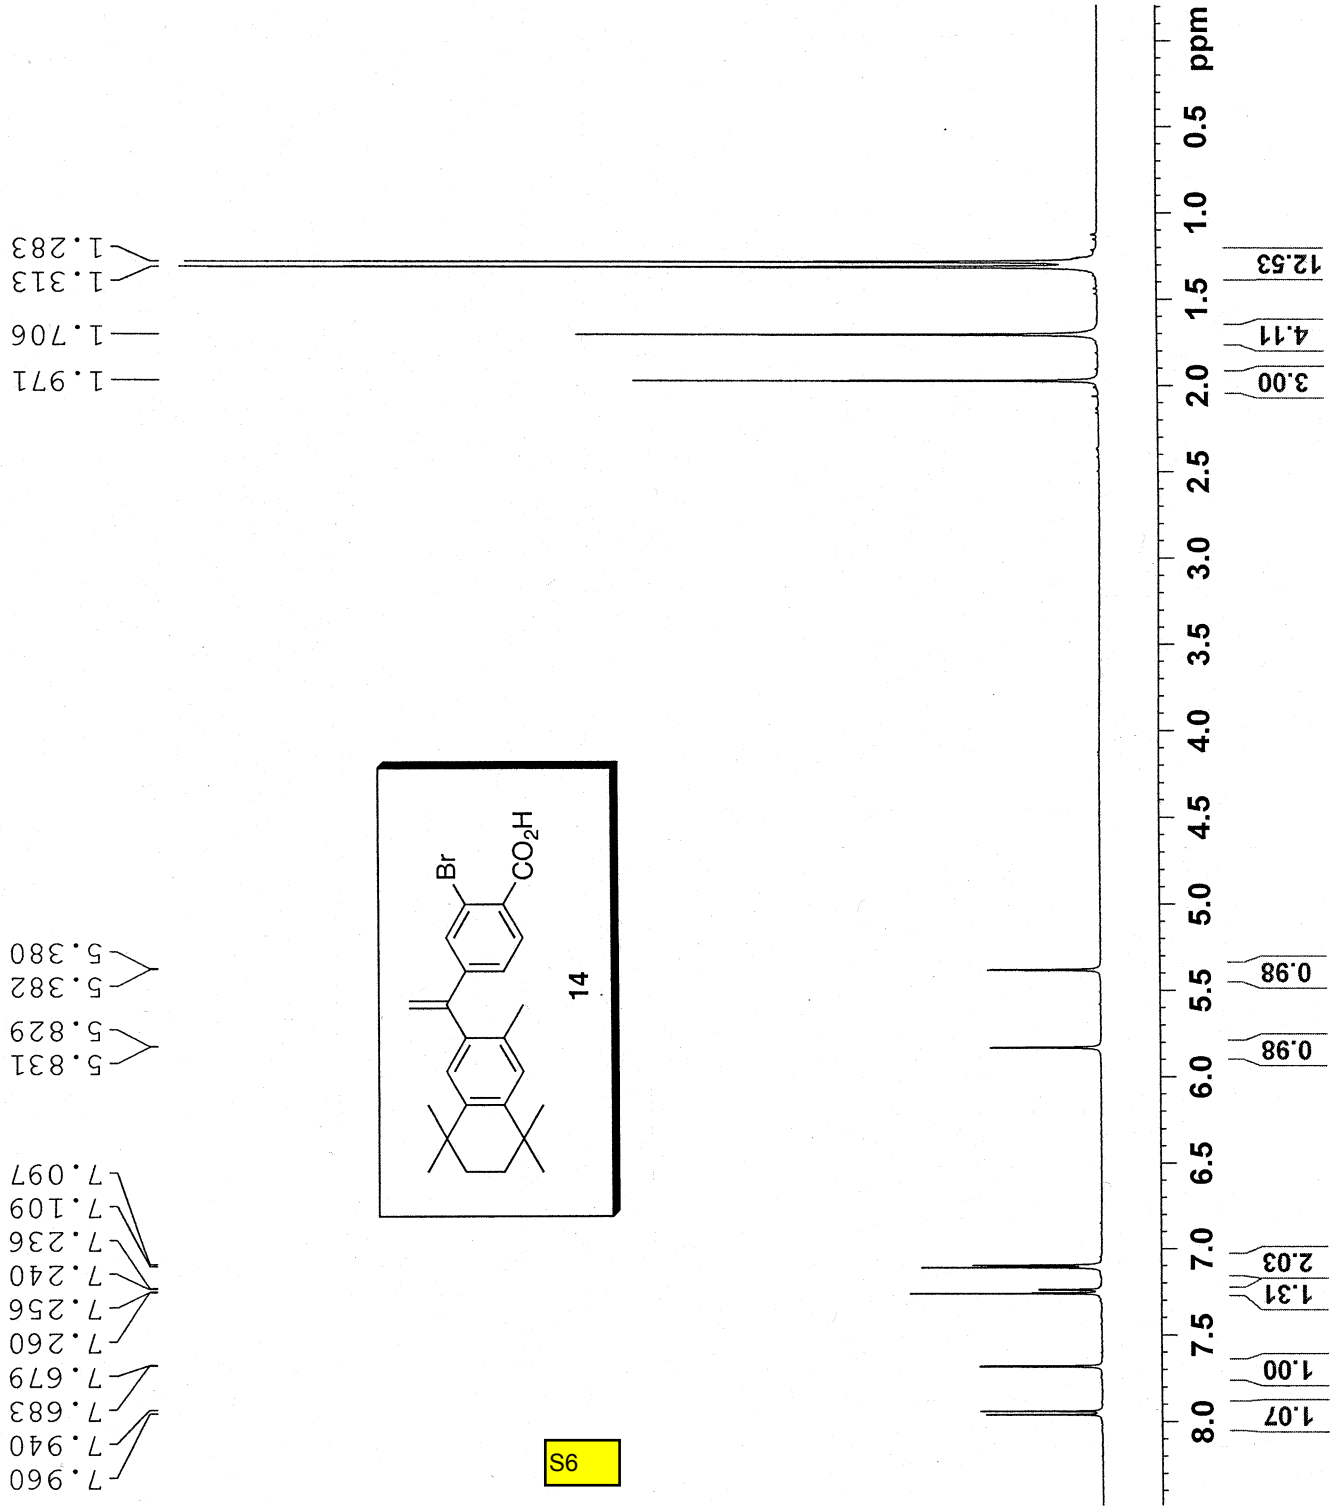

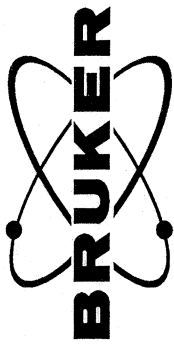

NAME CWII-151  
 EXPNO 6  
 PROCNO 1  
 Date 20120419  
 Time 18.00  
 INSTRUM spect  
 PROBHD 5 mm PABBO BB-  
 PULPROG zg1g30  
 TD 65536  
 SOLVENT CDCl3  
 NS 422  
 DS 4  
 SWH 24038.461 Hz  
 FIDRES 0.366798 Hz  
 AQ 1.3631988 sec  
 RG 2050  
 DW 20.800 usec  
 DE 6.50 usec  
 TE 293.4 K  
 D1 2.0000000 sec  
 D11 0.0300000 sec  
 TD0 1

===== CHANNEL f1 =====  
 NUC1 13C  
 P1 8.50 usec  
 PL1 -2.10 dB  
 PL1W 60.29227829 W  
 SFO1 100.6228298 MHz

===== CHANNEL f2 =====  
 CPDPRG2 waltz16  
 NUC2 1H  
 PCPD2 90.00 usec  
 PL2 -1.80 dB  
 PL12 17.28 dB  
 PL2W 21.67079544 W  
 PL12W 0.26783961 W  
 SFO2 400.1316005 MHz  
 SI 32768  
 SF 100.6127729 MHz  
 WDW EM  
 SSB 0  
 LB 1.00 Hz  
 GB 0  
 PC 1.40

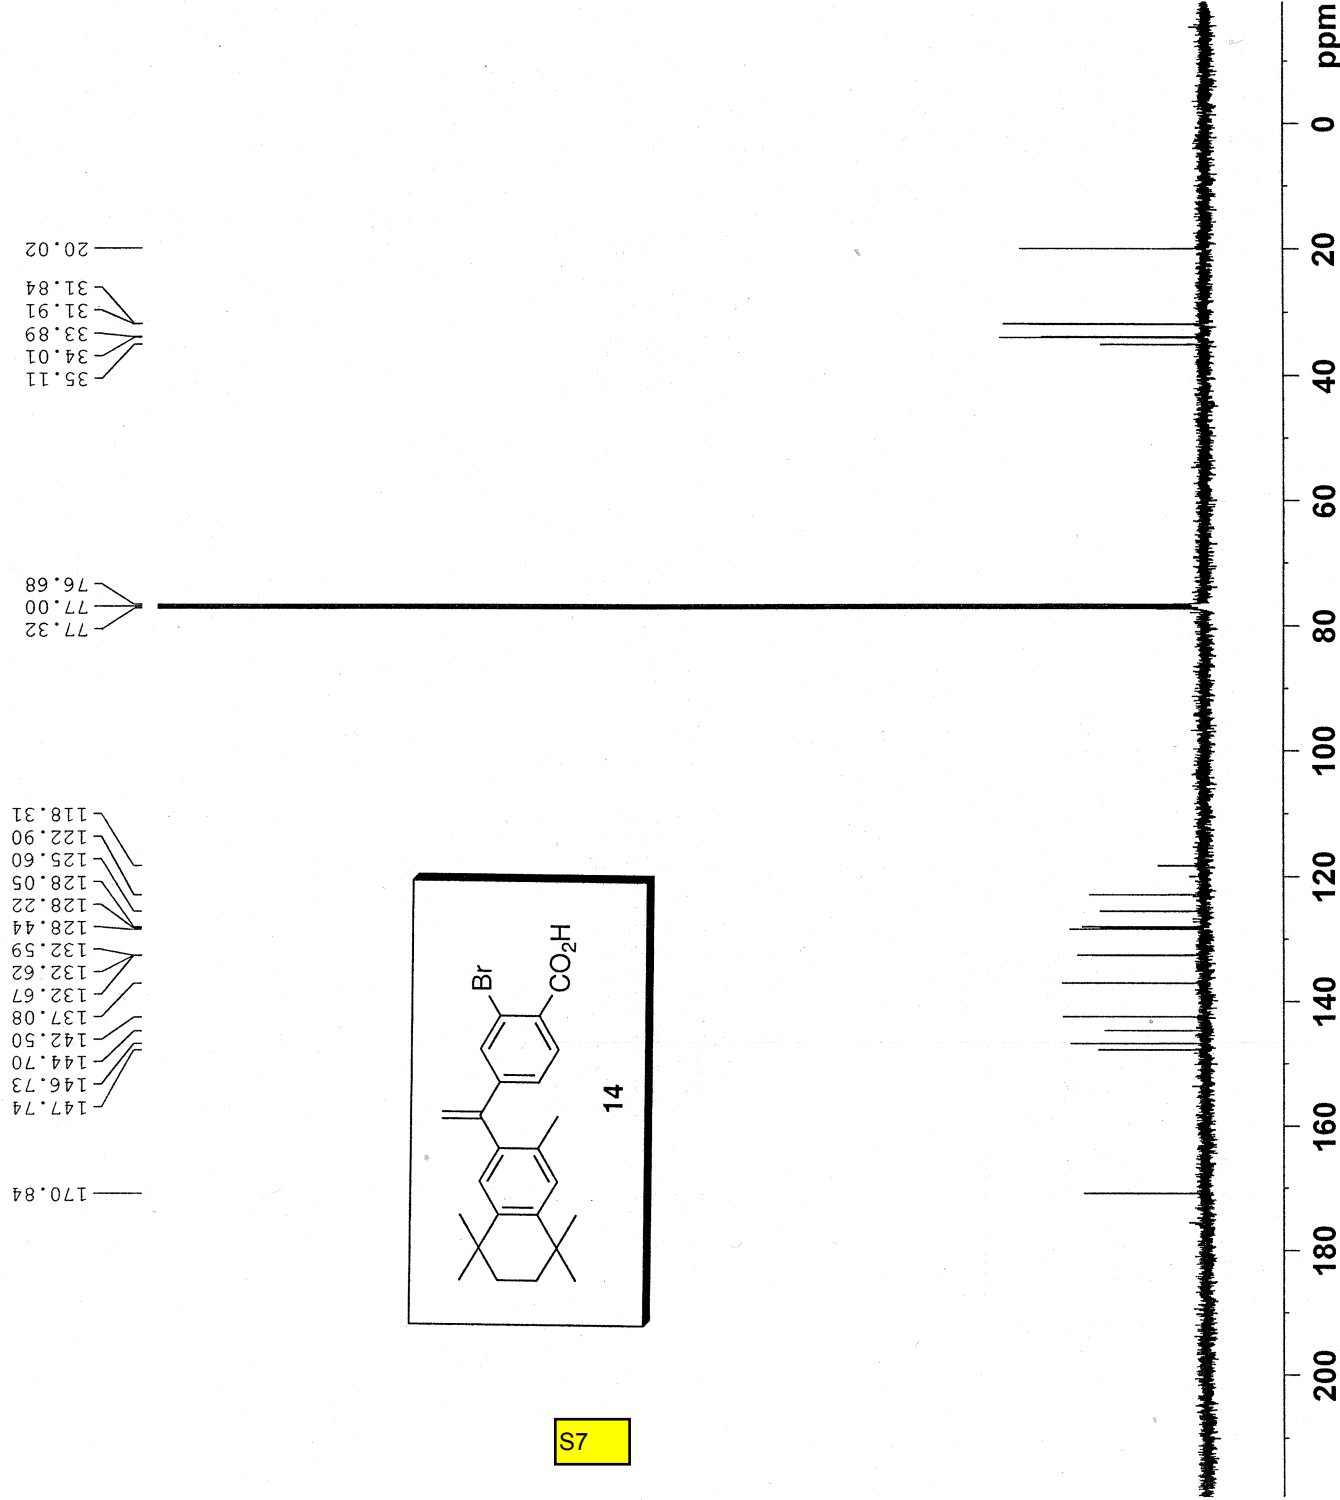

S7

CWII-157

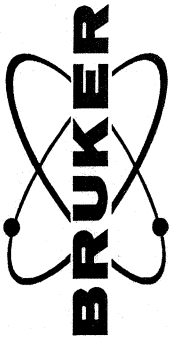

NAME CWII-157  
 EXPNO 3  
 PROCNO 1  
 Date\_ 20120420  
 Time\_ 17.52  
 INSTRUM spect  
 PROBHD 5 mm PABBO BB-  
 PULPROG zg30  
 TD 65536  
 SOLVENT CDCl3  
 NS 64  
 DS 2  
 SWH 8223.685 Hz  
 FIDRES 0.125483 Hz  
 AQ 3.9846387 sec  
 RG 4  
 DW 60.800 usec  
 DE 6.50 usec  
 TE 292.6 K  
 D1 1.00000000 sec  
 TD0 1

===== CHANNEL f1 =====  
 NUC1 1H  
 P1 14.00 usec  
 PL1 0.50 dB  
 PL1W 12.76071072 W  
 SF01 400.1324710 MHz  
 SI 32768  
 SF 400.1300101 MHz  
 EM  
 SSB 0  
 LB 0.30 Hz  
 GB 0  
 PC 1.00

2.379  
 1.702  
 1.323  
 1.222

8.137  
 8.133  
 8.068  
 8.048  
 7.815  
 7.811  
 7.795  
 7.791  
 7.277  
 7.260  
 7.235

9.849

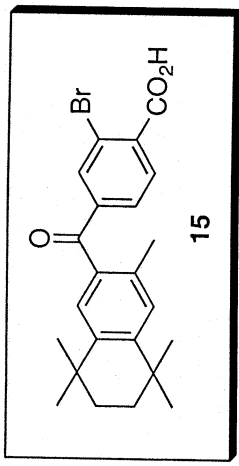

S8

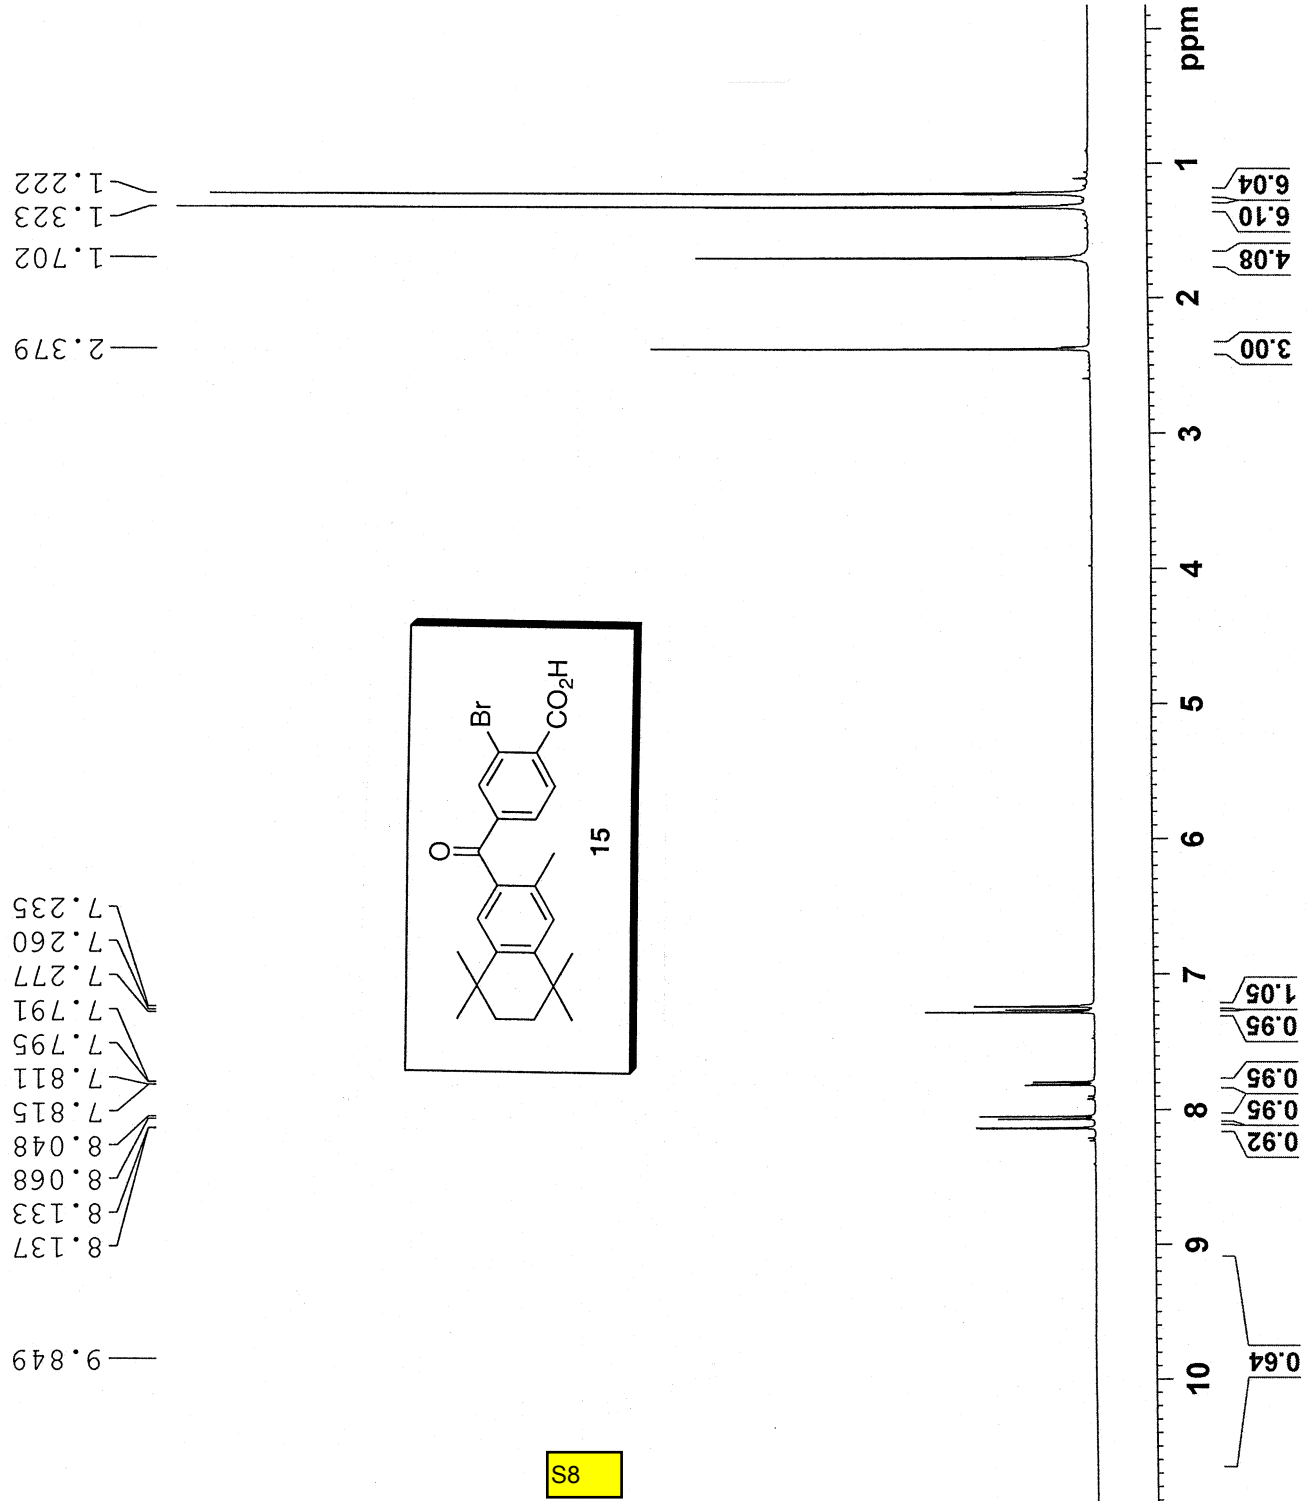



CWII-157

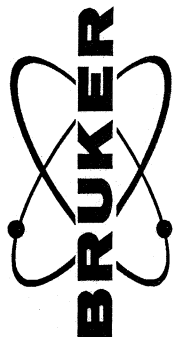

NAME CWII-157  
 EXPNO 4  
 PROCNO 1  
 Date\_ 20120420  
 Time\_ 18.14  
 INSTRUM spect  
 PROBHD 5 mm PABBO BB-  
 PULPROG zgig30  
 TD 65536  
 SOLVENT CDCl3  
 NS 328  
 DS 4  
 SWH 24038.461 Hz  
 FIDRES 0.366798 Hz  
 AQ 1.3631988 sec  
 RG 2050  
 DW 20.800 usec  
 DE 6.50 usec  
 TE 293.1 K  
 D1 2.00000000 sec  
 D11 0.03000000 sec  
 TD0 1

===== CHANNEL f1 =====  
 NUC1 13C  
 P1 8.50 usec  
 PL1 -2.10 dB  
 PL1W 60.29227829 W  
 SF01 100.6228298 MHz

===== CHANNEL f2 =====  
 CPDPRG2 waltz16  
 NUC2 1H  
 PCPD2 90.00 usec  
 PL2 -1.80 dB  
 PL12 17.28 dB  
 PL2W 21.67079544 W  
 PL12W 0.26783961 W  
 SFO2 400.1316005 MHz  
 SI 32768  
 SF 100.6127736 MHz  
 WDW EM  
 SSB 0  
 LB 1.00 Hz  
 GB 0  
 PC 1.40

20.15  
 31.56  
 31.68  
 33.90  
 34.42  
 34.76  
 34.82

76.68  
 77.00  
 77.32

122.41  
 128.57  
 128.85  
 129.74  
 132.08  
 133.61  
 133.69  
 135.01  
 136.08  
 142.09  
 142.50  
 149.03

170.54

195.89

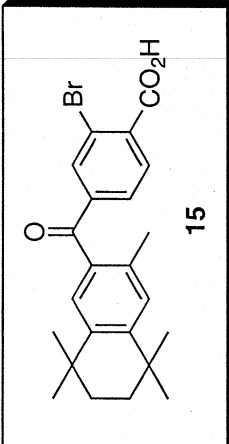

69

ppm 0 20 40 60 80 100 120 140 160 180 200

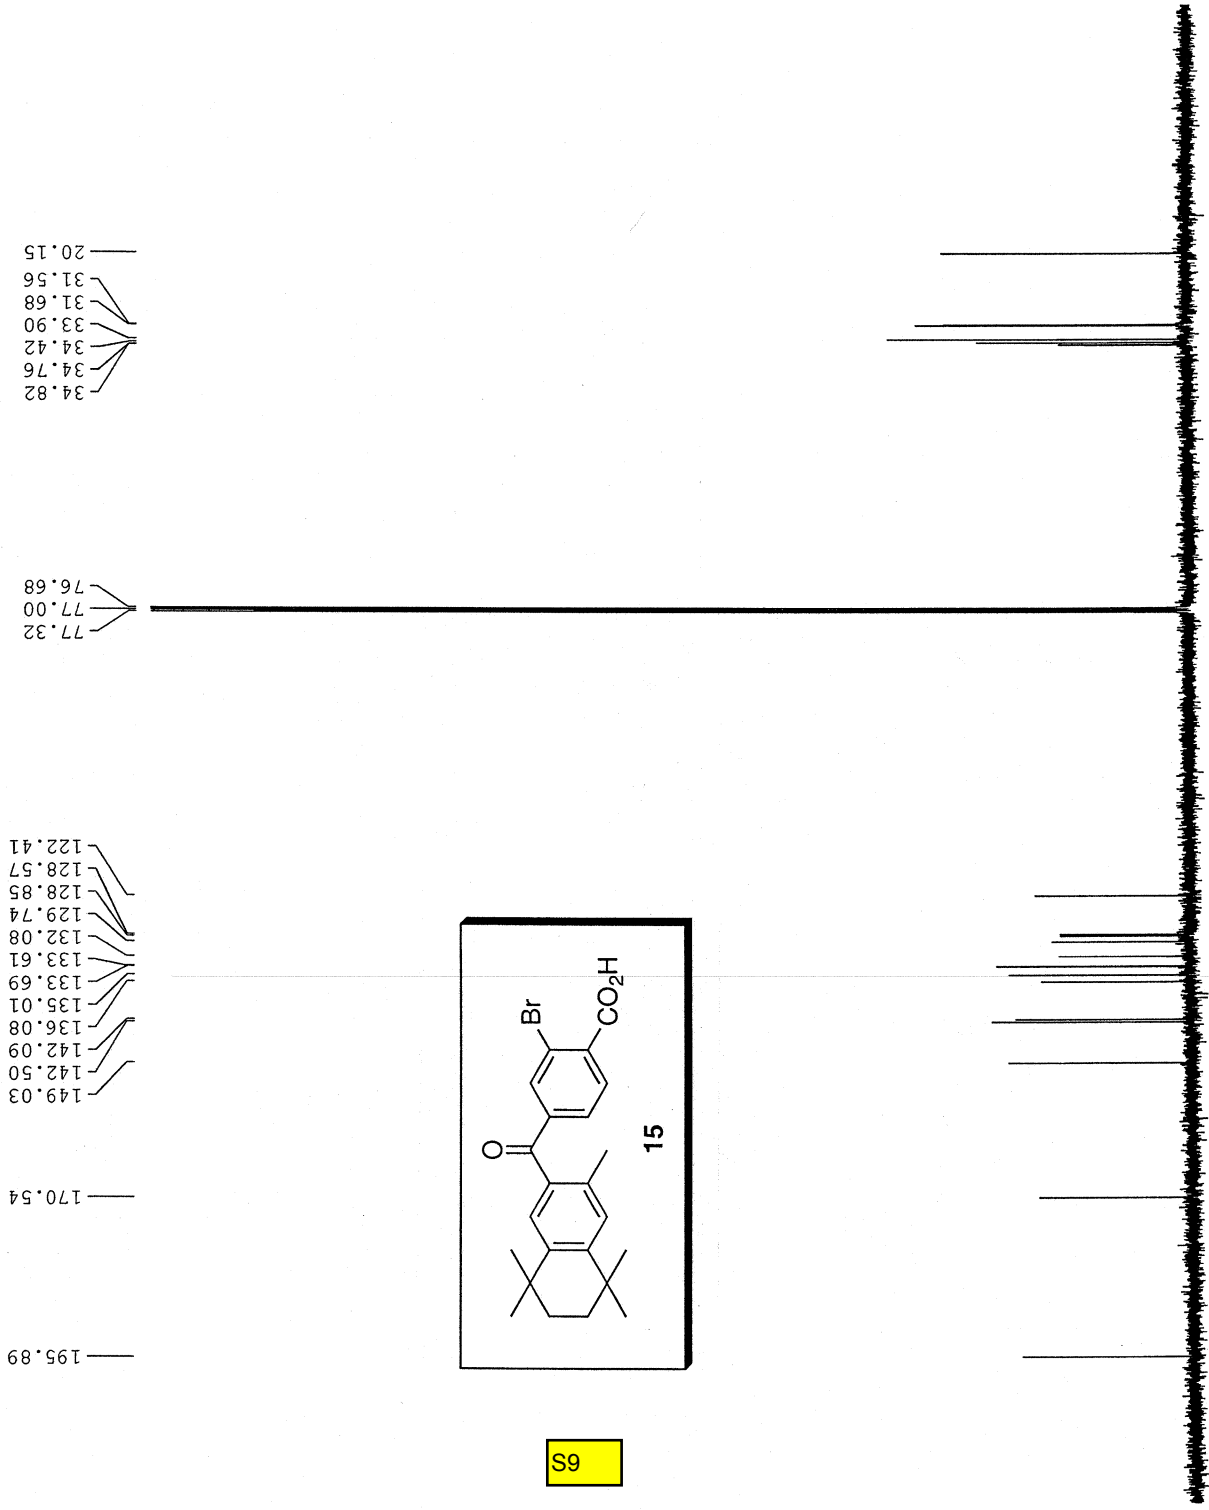

CWII-153

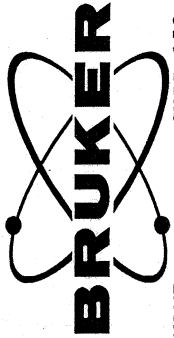

NAME CWII-153  
 EXPNO 4  
 PROCNO 1  
 Date\_ 20120423  
 Time 17.34  
 INSTRUM spect  
 PROBHD 5 mm PABBO BB-  
 PULPROG zg30  
 TD 65536  
 SOLVENT CDCl3  
 NS 128  
 DS 2  
 SWH 8223.685 Hz  
 FIDRES 0.125483 Hz  
 AQ 3.9846387 sec  
 RG 4  
 DW 60.800 usec  
 DE 6.50 usec  
 TE 293.0 K  
 D1 1.0000000 sec  
 TDO 1

===== CHANNEL f1 =====  
 NUC1 1H  
 P1 14.00 usec  
 PL1 0.50 dB  
 PL1W 12.76071072 W  
 SFO1 400.1324710 MHz  
 SI 32768  
 SF 400.1300101 MHz  
 WDW EM  
 SSB 0  
 LB 0.30 Hz  
 GB 0  
 PC 1.00

1.970  
 1.702  
 1.310  
 1.279

5.817  
 5.815  
 5.370  
 5.368

8.063  
 8.059  
 7.953  
 7.933  
 7.260  
 7.242  
 7.237  
 7.101  
 7.093

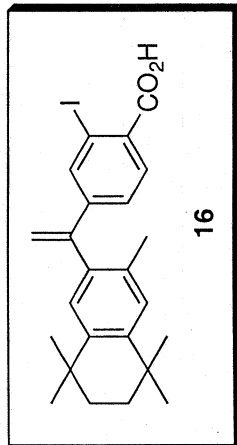

S10

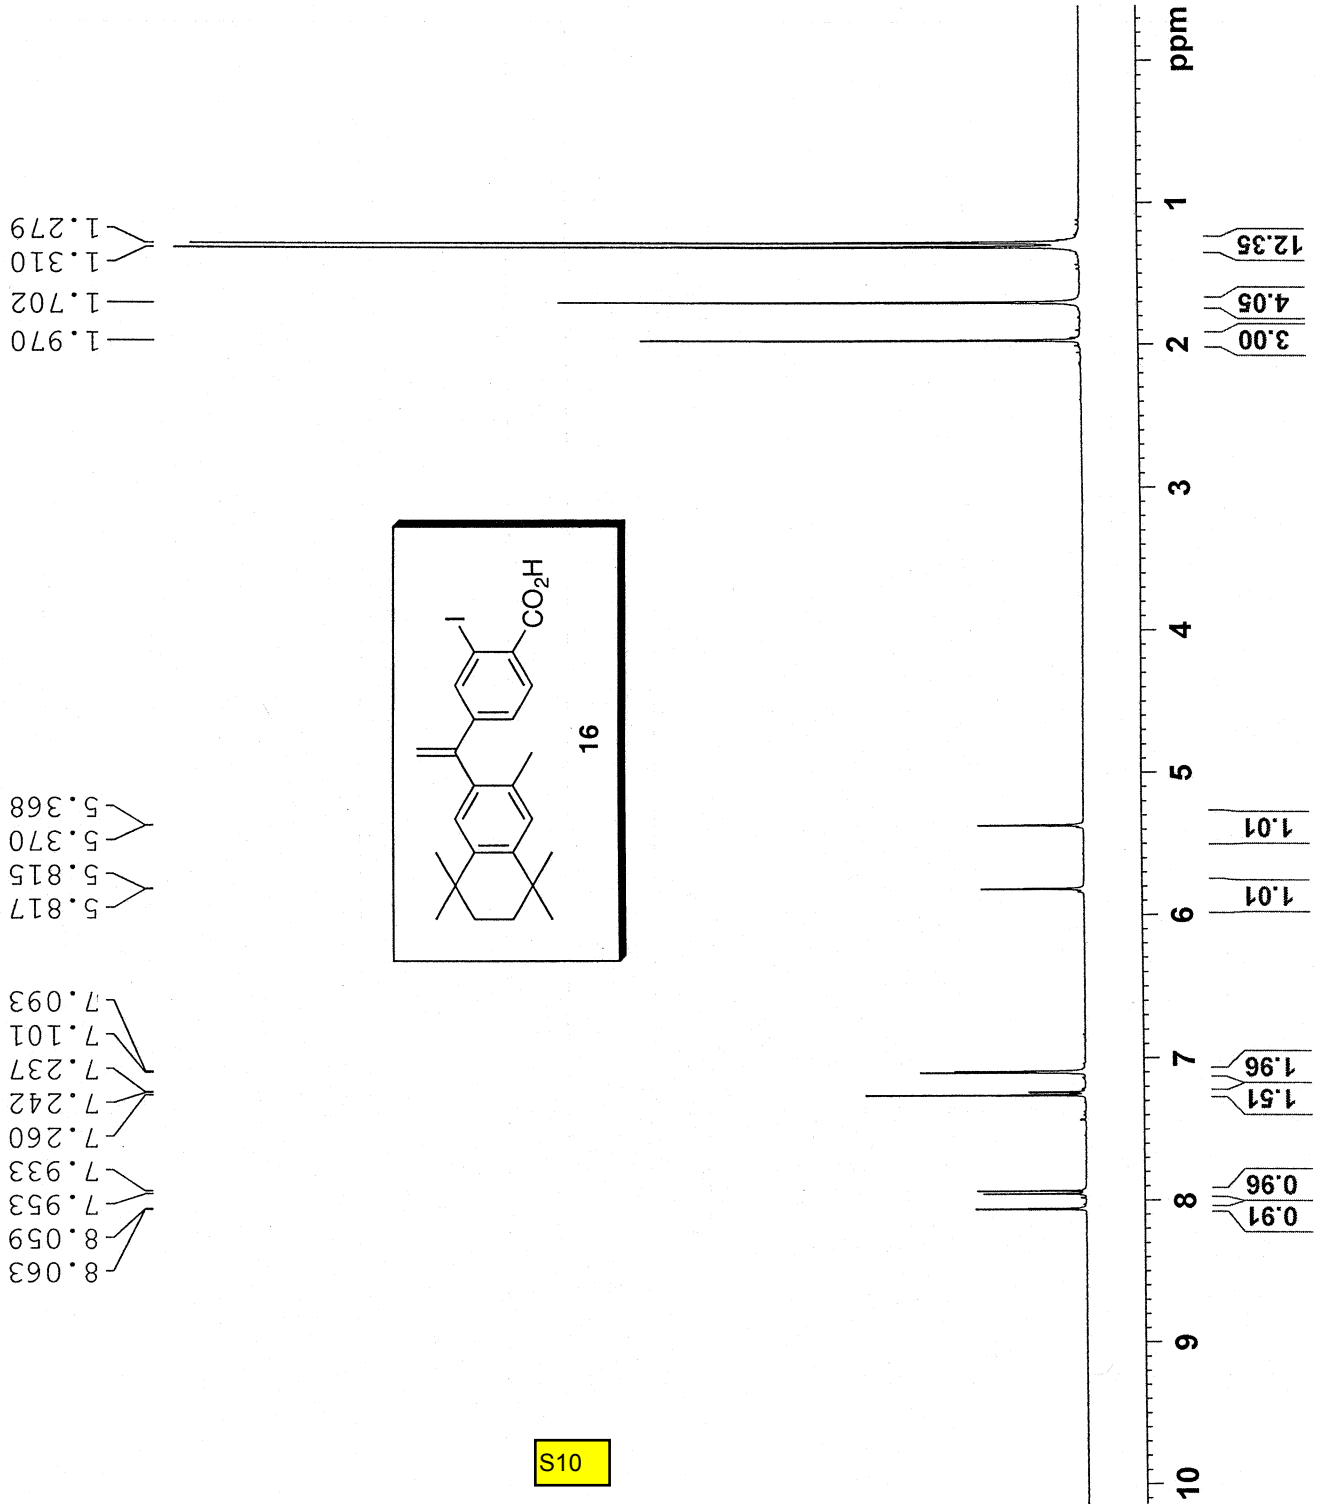

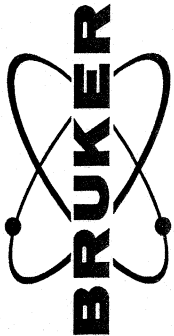

NAME CWII-153  
 EXPNO 5  
 PROCNO 1  
 Date\_ 20120423  
 Time 18.06  
 INSTRUM spect  
 PROBHD 5 mm PABBO BB-  
 PULPROG zgig30  
 TD 65536  
 SOLVENT CDC13  
 NS 507  
 DS 4  
 SWH 24038.461 Hz  
 FIDRES 0.366798 Hz  
 AQ 1.3631988 sec  
 RG 2050  
 DW 20.800 usec  
 DE 6.50 usec  
 TE 293.3 K  
 D1 2.0000000 sec  
 D11 0.0300000 sec  
 TD0 1

===== CHANNEL f1 =====  
 NUC1 13C  
 P1 8.50 usec  
 PL1 -2.10 dB  
 PL1W 60.29227829 W  
 SFO1 100.6228298 MHz

===== CHANNEL f2 =====  
 CPDPRG2 waltz16  
 NUC2 1H  
 PCPD2 90.00 usec  
 PL2 -1.80 dB  
 PLI2 17.28 dB  
 PL2W 21.67079544 W  
 PLI2W 0.26783961 W  
 SFO2 400.1316005 MHz  
 SI 32768  
 SF 100.6127722 MHz  
 WDW EM  
 SSB 0  
 LB 1.00 Hz  
 GB 0  
 PC 1.40

170.72  
 147.56  
 146.57  
 144.67  
 142.48  
 139.77  
 137.10  
 132.60  
 132.09  
 131.25  
 128.22  
 128.05  
 126.49  
 118.29  
 95.10  
 77.32  
 77.00  
 76.68  
 35.11  
 34.01  
 33.89  
 31.91  
 31.85  
 20.06

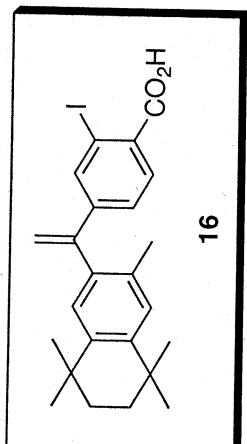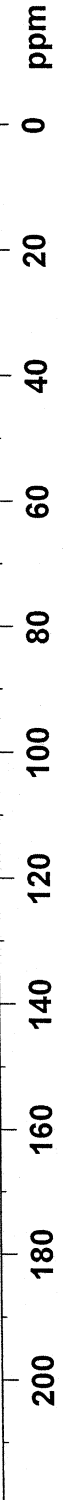

CWII-159

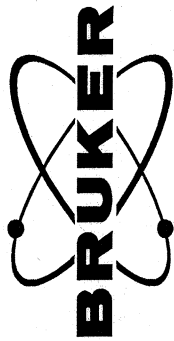

NAME CWII-159  
 EXPNO 6  
 PROCNO 1  
 Date\_ 20120419  
 Time\_ 22.52  
 INSTRUM spect  
 PROBHD 5 mm PABBO BB-  
 PULPROG zg30  
 TD 65536  
 SOLVENT CDCl3  
 NS 64  
 DS 2  
 SWH 8223.685 Hz  
 FIDRES 0.125483 Hz  
 AQ 3.9846387 sec  
 RG 4  
 DW 60.800 usec  
 DE 6.50 usec  
 TE 293.1 K  
 D1 1.00000000 sec  
 TD0 1

===== CHANNEL f1 =====  
 NUC1 1H  
 P1 14.00 usec  
 PL1 0.50 dB  
 PL1W 12.76071072 W  
 SFO1 400.1324710 MHz  
 SI 32768  
 SF 400.1300101 MHz  
 WDW EM  
 SSB 0  
 LB 0.30 Hz  
 GB 0  
 PC 1.00

8.457  
 8.453  
 8.075  
 8.055  
 7.858  
 7.854  
 7.838  
 7.834  
 7.277  
 7.260  
 7.234

2.387  
 1.702  
 1.323  
 1.224

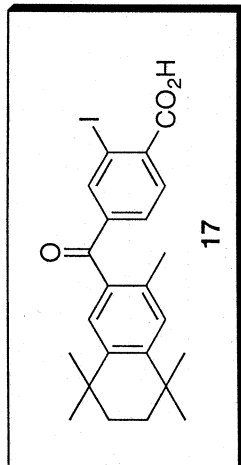

S12

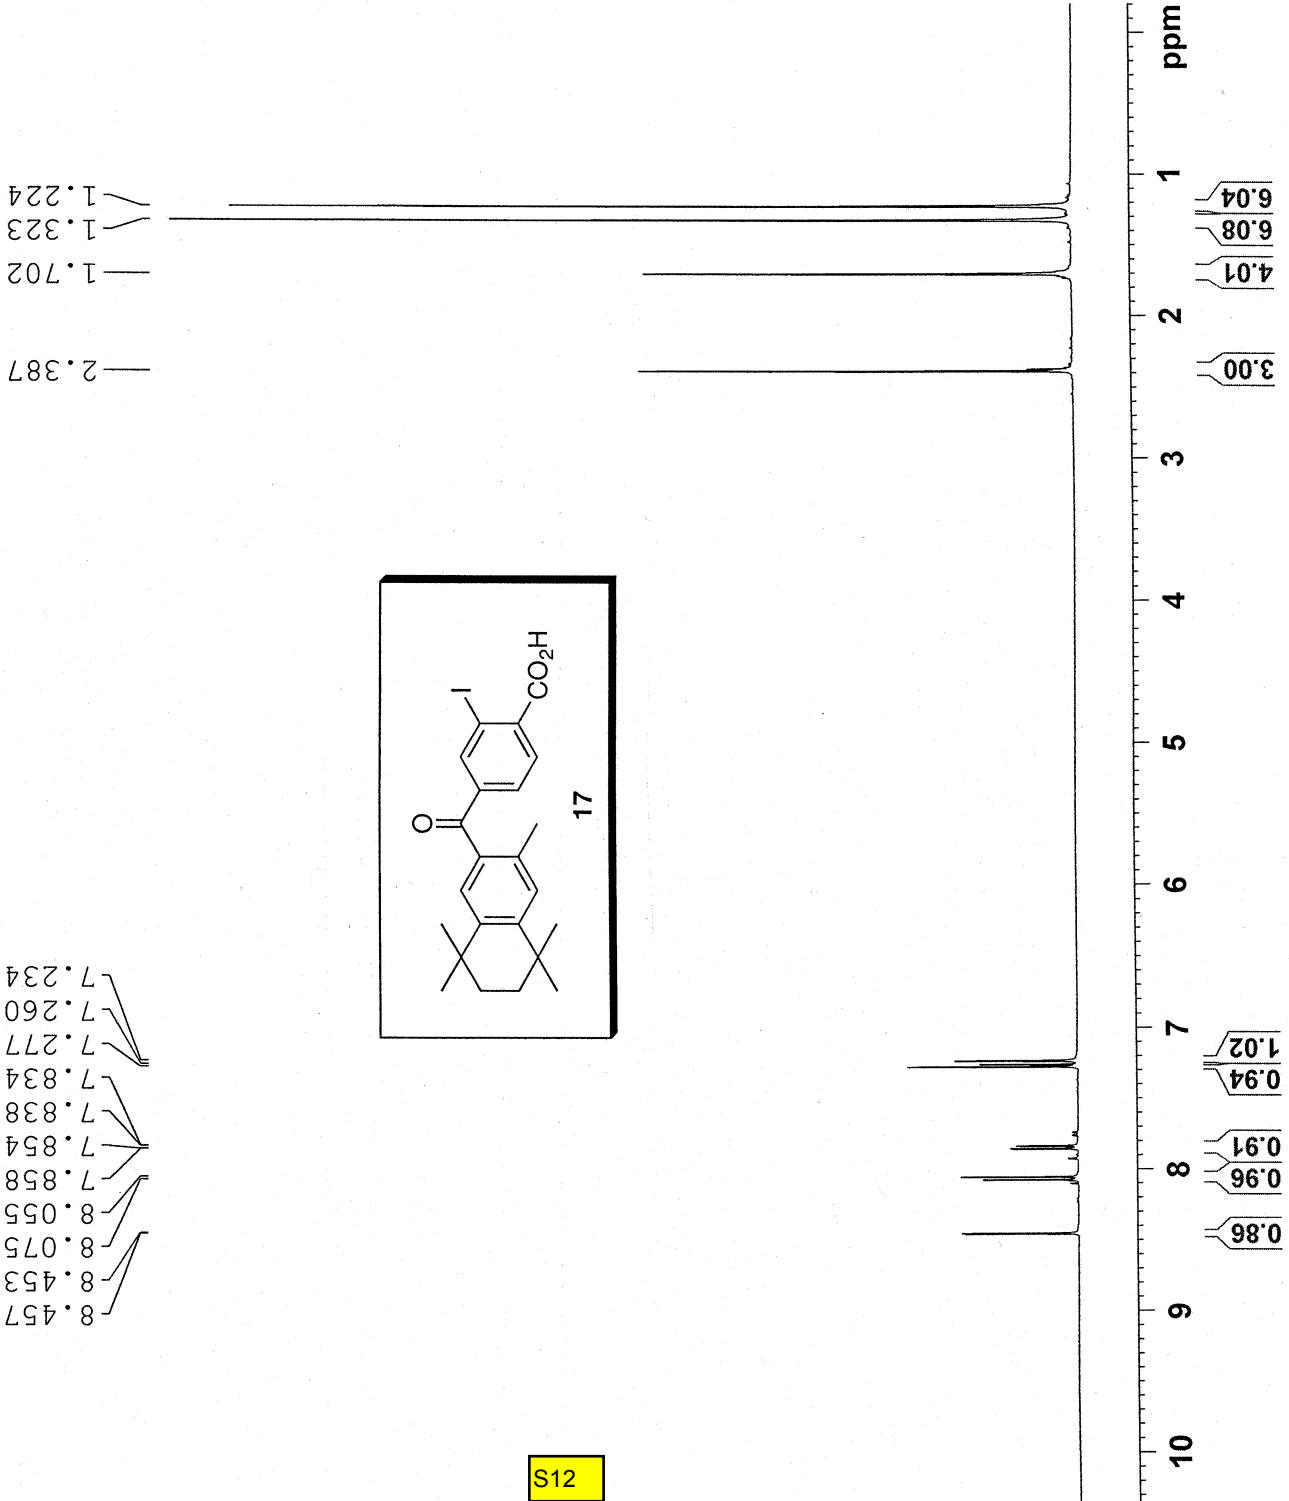

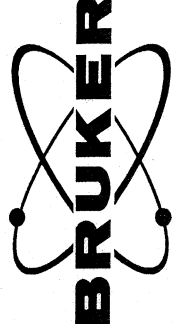

CWII-159

195.74  
170.76  
149.03  
143.14  
142.25  
142.06  
136.43  
135.12  
133.62  
131.64  
129.76  
129.40  
129.00  
34.82  
34.76  
34.42  
33.90  
31.70  
31.55  
20.18

NAME CWII-159  
EXPNO 7  
PROCNO 1  
Date\_ 20120419  
Time\_ 23.05  
INSTRUM spect  
PROBHD 5 mm PABBO BB-  
PULPROG zgig30  
TD 65536  
SOLVENT CDCl3  
NS 163  
DS 4  
SWH 24038.461 Hz  
FIDRES 0.366798 Hz  
AQ 1.3631988 sec  
RG 2050  
DW 20.800 usec  
DE 6.50 usec  
TE 293.3 K  
D1 2.00000000 sec  
D11 0.03000000 sec  
TD0 1

==== CHANNEL f1 =====  
NUC1 13C  
P1 8.50 usec  
PL1 -2.10 dB  
PL1W 60.29227829 W  
SFO1 100.6228298 MHz

==== CHANNEL f2 =====  
CPDPRG2 waltz16  
NUC2 1H  
PCPD2 90.00 usec  
PL2 -1.80 dB  
PL12 17.28 dB  
PL2W 21.67079544 W  
PL12W 0.26783961 W  
SFO2 400.1316005 MHz  
SI 32768  
SF 100.6127736 MHz  
WDW EM  
SSB 0  
LB 1.00 Hz  
GB 0  
PC 1.40

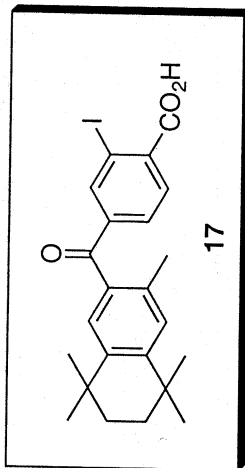

S13

200 180 160 140 120 100 80 60 40 20 0 ppm

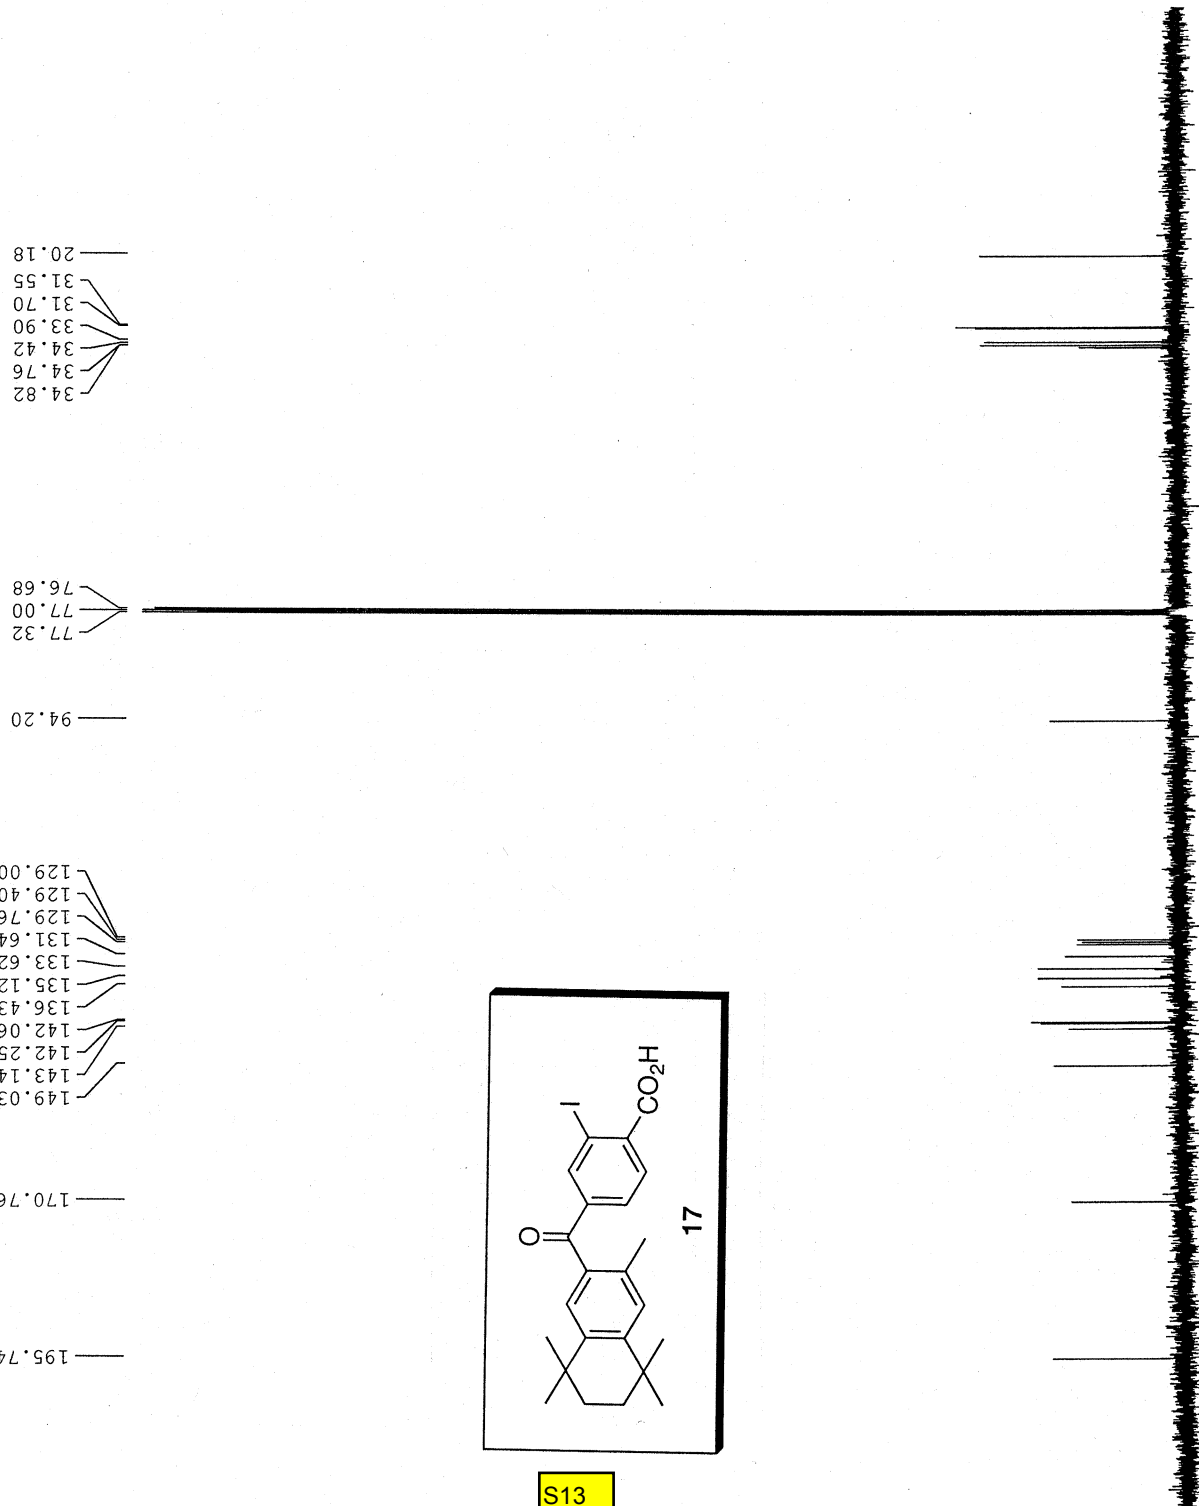

CWIII-087

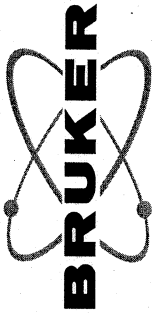

NAME CWIII-087  
 EXPNO 1  
 PROCNO 1  
 Date\_ 20100827  
 Time\_ 15.06  
 INSTRUM spect  
 PROBHD 5 mm PABBO BB-  
 PULPROG zg30  
 TD 65536  
 SOLVENT CDC13  
 NS 16  
 DS 2  
 SWH 8223.685 Hz  
 FIDRES 0.1125483 Hz  
 AQ 3.9846387 sec  
 RG 4  
 DW 60.800 usec  
 DE 6.50 usec  
 TE 292.0 K  
 D1 1.00000000 sec  
 TDO 1  
 ===== CHANNEL f1 =====  
 NUC1 1H  
 P1 10.00 usec  
 PL1 -1.80 dB  
 PL1W 21.67079544 W  
 SFO1 400.1324710 MHz  
 SI 32768  
 SF 400.1300106 MHz  
 WDW EM  
 SSB 0  
 LB 0.30 Hz  
 GB 0  
 PC 1.00

1.279  
 1.312  
 1.705  
 1.974

5.413  
 5.845  
 5.847  
 6.886  
 6.889  
 6.914  
 7.086  
 7.106  
 7.260

9.230

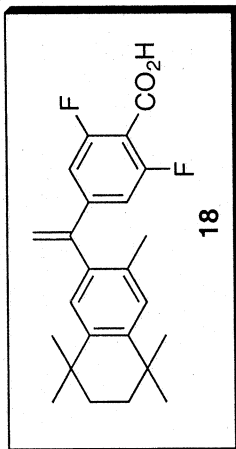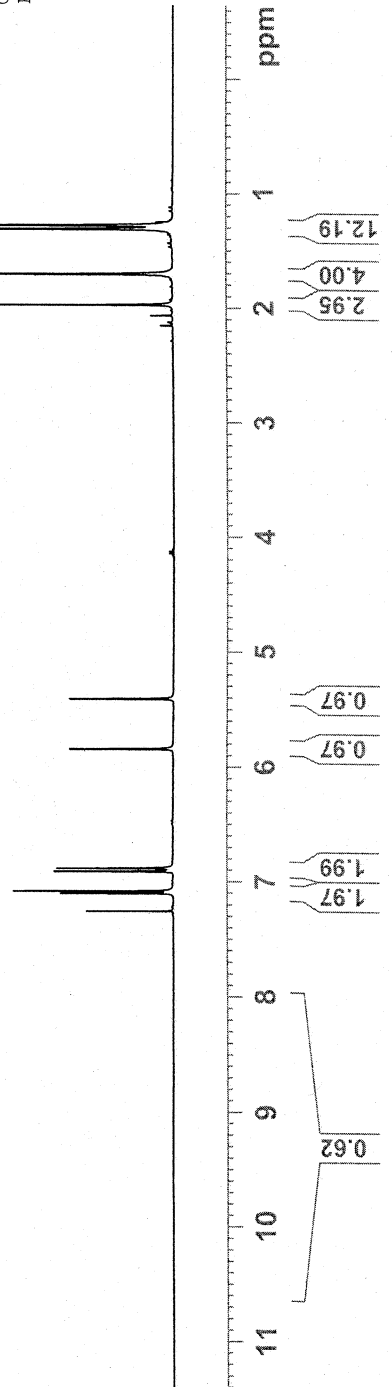

CWIII-087

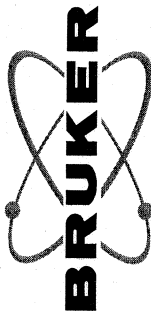

NAME CWIII-087  
 EXPNO 2  
 PROCNO 1  
 Date\_ 20100827  
 Time\_ 15.18  
 INSTRUM spect  
 PROBHD 5 mm PABEO BB-  
 PULPROG zgpg30  
 TD 65536  
 SOLVENT CDC13  
 NS 1024  
 DS 4  
 SWH 24038.461 Hz  
 FIDRES 0.366798 Hz  
 AQ 1.3631988 sec  
 RG 2050  
 DW 20.800 usec  
 DE 6.50 usec  
 TE 292.2 K  
 D1 2.0000000 sec  
 D11 0.0300000 sec  
 TDO 1

==== CHANNEL f1 =====  
 NUC1 13C  
 P1 8.50 usec  
 PL1 -1.50 dB  
 PL1W 52.51238251 W  
 SFO1 100.6228298 MHz

==== CHANNEL f2 =====  
 CPDPRG2 waltz16  
 NUC2 1H  
 PCPD2 90.00 usec  
 PL2 -1.80 dB  
 PL12 17.28 dB  
 PL2W 21.67079544 W  
 PL12W 0.26783961 W  
 SFO2 400.1316005 MHz  
 SI 32768  
 SF 100.6127736 MHz  
 WDM EM  
 SSB 0  
 LB 1.00 Hz  
 GB 0  
 PC 1.40

19.83  
 31.83  
 31.90  
 33.88  
 34.02  
 35.05  
 35.08

76.68  
 76.99  
 77.31

107.51  
 107.67  
 107.83  
 110.14  
 110.37  
 110.40  
 118.71  
 118.71  
 128.01  
 128.28  
 132.56  
 136.49  
 142.64  
 144.98  
 147.26  
 147.71  
 147.81  
 147.91  
 160.23  
 160.29  
 162.80  
 162.86  
 166.69

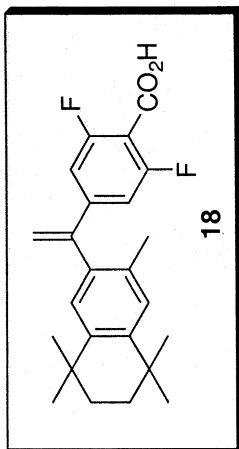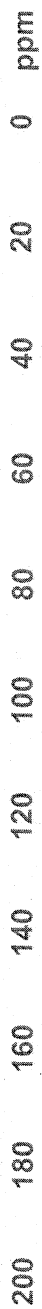

CWIII-089

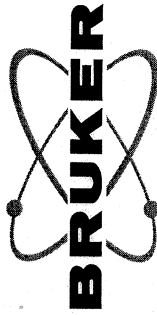

NAME CWIII-089  
 EXPNO 1  
 PROCNO 1  
 Date\_ 20110321  
 Time\_ 16.47  
 INSTRUM spect  
 PROBHD 5 mm PABBO BB-  
 PULPROG zg30  
 TD 65536  
 SOLVENT CDCI3  
 NS 16  
 DS 2  
 SWH 8223.685 Hz  
 FIDRES 0.125483 Hz  
 AQ 3.9846387 sec  
 RG 4  
 DW 60.800 usec  
 DE 6.50 usec  
 TE 293.4 K  
 D1 1.00000000 sec  
 TD0 1

===== CHANNEL f1 =====  
 NUC1 1H  
 P1 10.00 usec  
 PL1 -1.80 dB  
 PL1W 21.67079544 W  
 SF01 400.1324710 MHz  
 SI 32768  
 SF 400.1300106 MHz  
 WDW EM  
 SSB 0  
 LB 0.30 Hz  
 GB 0  
 PC 1.00

2.345  
 1.696  
 1.313  
 1.218

7.407  
 7.386  
 7.260  
 7.251  
 7.225

8.548

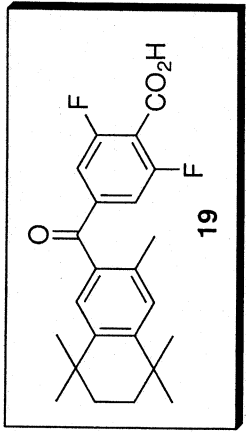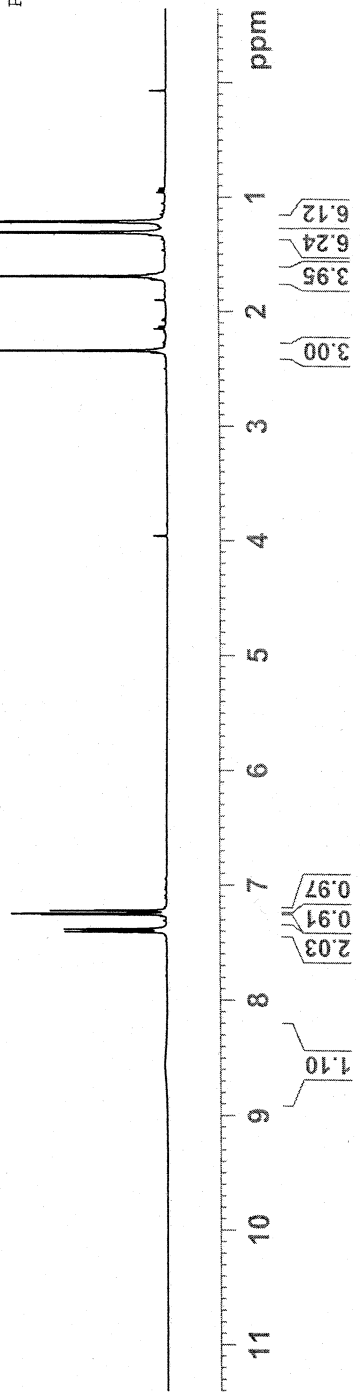



CWIII-089

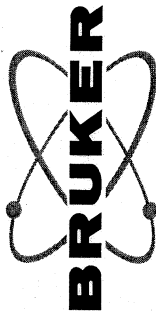

NAME CWIII-089  
 EXPNO 2  
 PROCNO 1  
 Date\_ 20110321  
 Time\_ 17.07  
 INSTRUM spect  
 PROBHD 5 mm PABBO BB-  
 PULPROG zgig30  
 TD 65536  
 SOLVENT CDCl3  
 NS 1024  
 DS 4  
 SWH 24038.461 Hz  
 FIDRES 0.366798 Hz  
 AQ 1.3631988 sec  
 RG 2050  
 DW 20.800 usec  
 DE 6.50 usec  
 TE 293.7 K  
 D1 2.0000000 sec  
 D11 0.0300000 sec  
 TDO 1

===== CHANNEL f1 =====  
 NUC1 13C  
 P1 8.50 usec  
 PL1 -1.50 dB  
 PL1W 52.51238251 W  
 SFO1 100.6228298 MHz

===== CHANNEL f2 =====  
 CPDPRG2 waltz16  
 NUC2 1H  
 PCPD2 90.00 usec  
 PL2 -1.80 dB  
 PL12 17.28 dB  
 PL2W 21.67079544 W  
 PL12W 0.26783961 W  
 SFO2 400.1316005 MHz  
 SI 32768  
 SF 100.6127722 MHz  
 WDW EM  
 SSB 0  
 LB 1.00 Hz  
 GB 0  
 PC 1.40

20.03  
 31.56  
 31.68  
 33.92  
 34.44  
 34.74  
 34.79

76.68  
 77.00  
 77.32

113.44  
 113.71

128.39  
 129.79  
 133.27  
 134.85  
 142.24  
 143.27  
 149.23  
 159.44  
 159.49  
 162.02  
 162.08  
 165.69

194.70

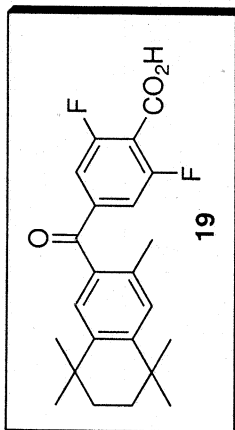

ppm

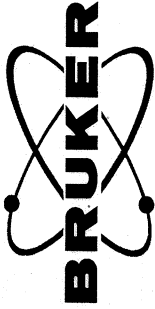

CWII-085H

NAME CWII-085  
EXPNO 2  
PROCNO 1  
Date\_ 20090328  
Time\_ 19.17  
INSTRUM spect  
PROBHD 5 mm PABBO BB-  
PULPROG zg30  
TD 65536  
SOLVENT CDC13  
NS 16  
DS 2  
SWH 8223.685 Hz  
FIDRES 0.125483 Hz  
AQ 3.9846387 sec  
RG 4  
DW 60.800 usec  
DE 6.50 usec  
TE 298.2 K  
D1 1.00000000 sec  
TD0 1

==== CHANNEL f1 =====  
NUC1 1H  
P1 10.00 usec  
PL1 -1.80 dB  
PL1W 21.67079544 W  
SF01 400.1324710 MHz  
SI 32768  
SF 400.1300104 MHz  
WDW EM  
SSB 0  
LB 0.30 Hz  
GB 0  
PC 1.00

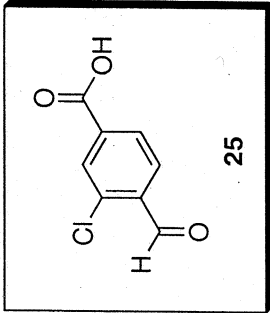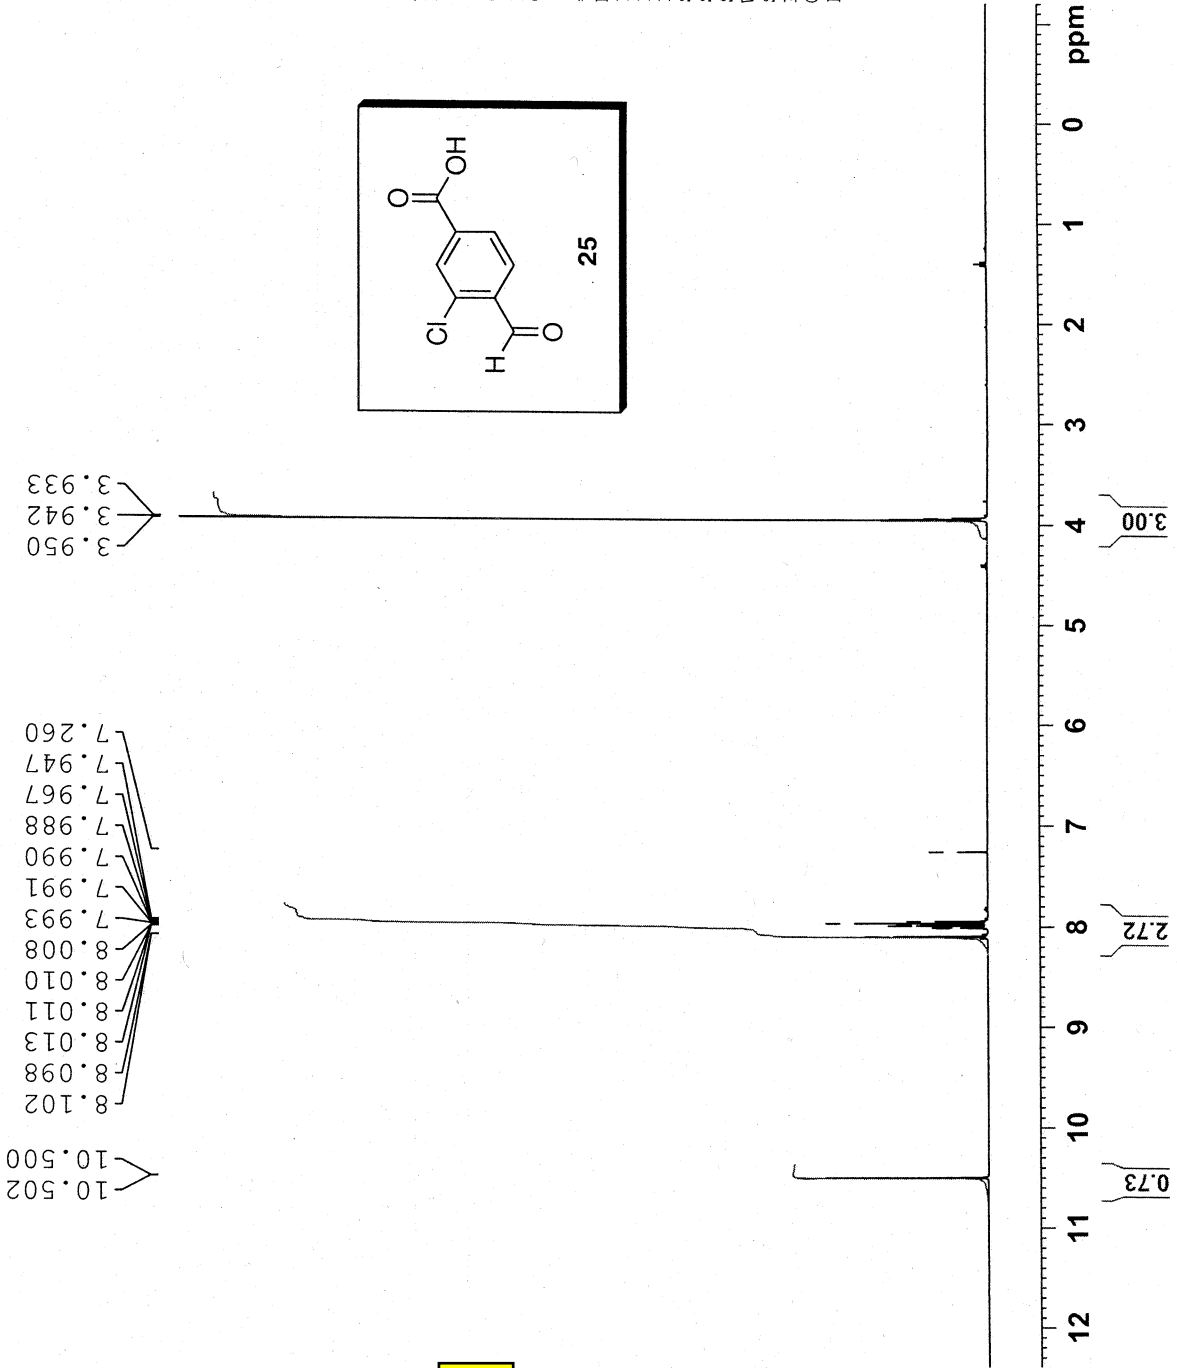

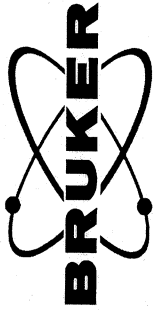

CWII-085  
NAME  
EXPNO 3  
PROCNO 1  
Date\_ 20090328  
Time\_ 19.28  
INSTRUM spect  
PROBHD 5 mm PABBO BB-  
PULPROG zgig30  
TD 65536  
SOLVENT CDCl3  
NS 64  
DS 4  
SWH 24038.461 Hz  
FIDRES 0.366798 Hz  
AQ 1.3631988 sec  
RG 2050  
DW 20.800 usec  
DE 6.50 usec  
TE 298.3 K  
D1 2.00000000 sec  
D11 0.03000000 sec  
TD0 1

==== CHANNEL f1 =====  
NUC1 13C  
P1 8.50 usec  
PL1 -1.50 dB  
PL1W 52.51238251 W  
SF01 100.6228298 MHz  
==== CHANNEL f2 =====  
CPDPRG2 waltz16  
NUC2 1H  
PCPD2 90.00 usec  
PL2 -1.80 dB  
PL12 17.28 dB  
PL2W 21.67079544 W  
PL12W 0.26783961 W  
SFO2 400.1316005 MHz  
SI 32768  
SF 100.6127729 MHz  
WDW EM  
SSB 0  
LB 1.00 Hz  
GB 0  
PC 1.40

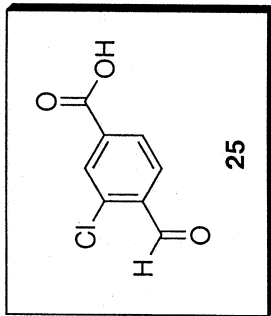

CWII-0085C

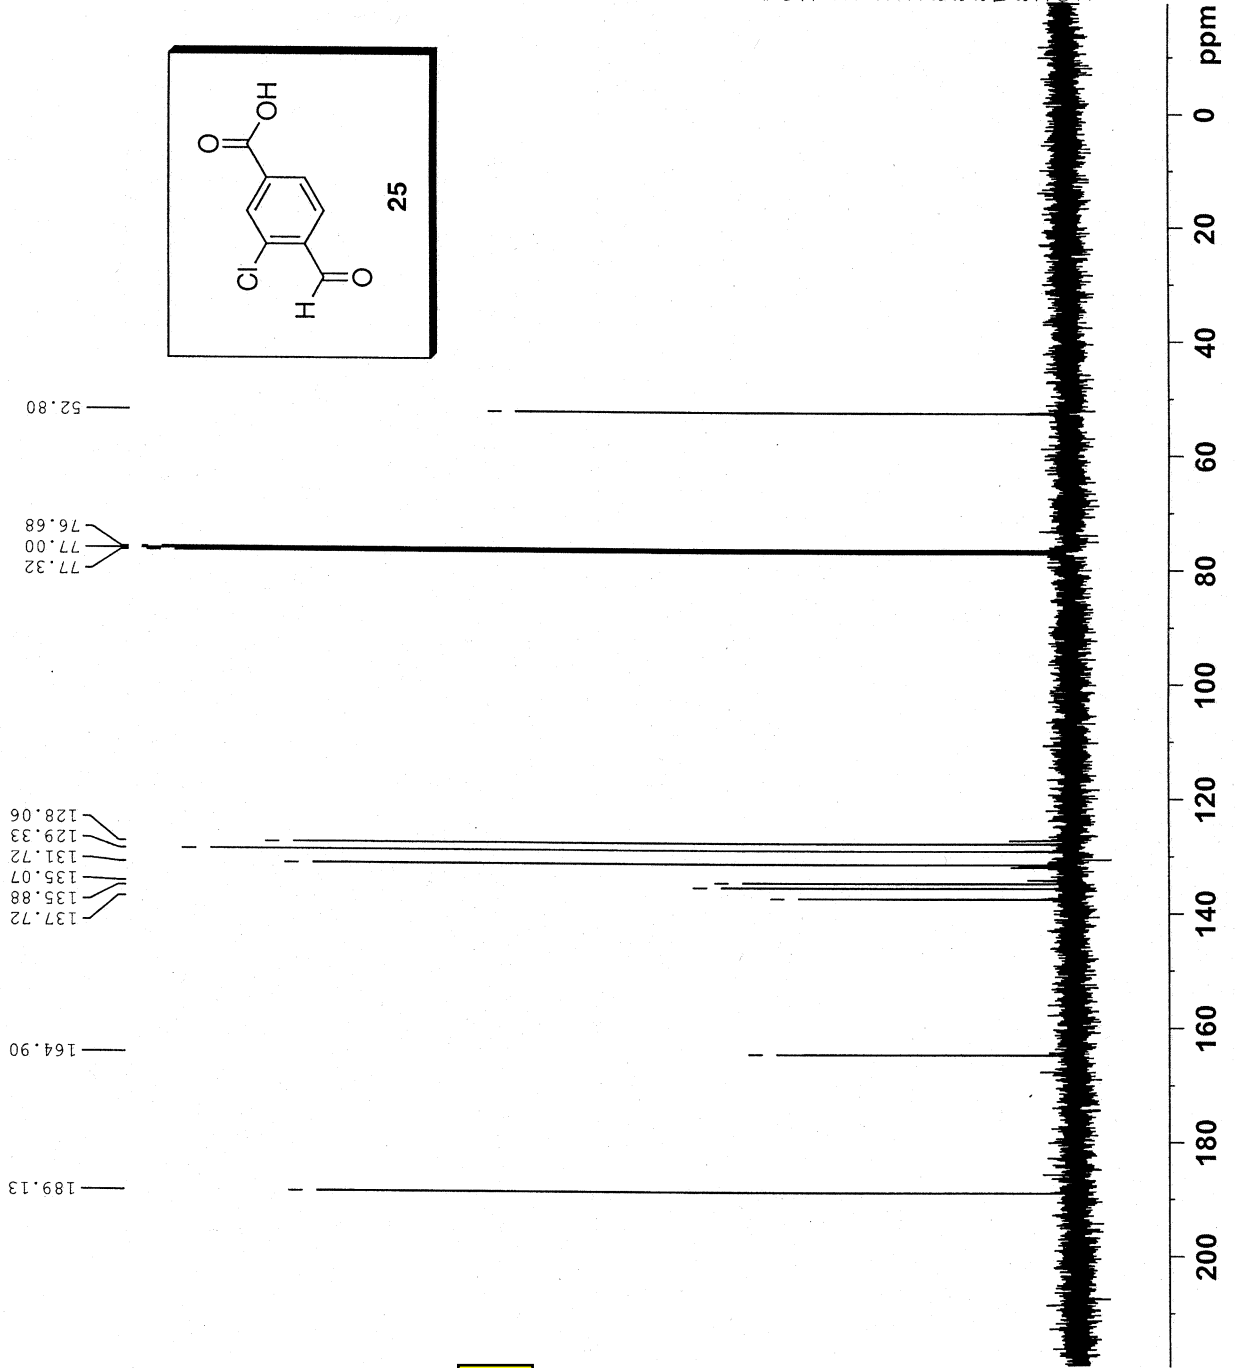

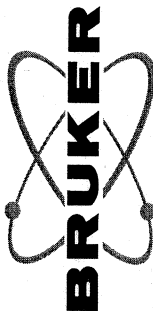

CWII-107  
NAME  
EXPNO 2  
PROCNO 1  
Date\_ 20090319  
Time\_ 11.24  
INSTRUM spect  
PROBHD 5 mm PABBO BB-  
PULPROG zg30  
TD 65536  
SOLVENT CDC13  
NS 16  
DS 2  
SWH 8223.685 Hz  
FIDRES 0.125483 Hz  
AQ 3.9846387 sec  
RG 4  
DW 60.800 usec  
DE 6.50 usec  
TE 293.4 K  
D1 1.00000000 sec  
TDO 1

==== CHANNEL f1 =====  
NUC1 1H  
P1 10.00 usec  
PL1 -1.80 dB  
PL1W 21.67079544 W  
SFO1 400.1324710 MHz  
SI 32768  
SF 400.1300104 MHz  
WDW no  
SSB 0  
LB 0.00 Hz  
GB 0  
PC 1.00

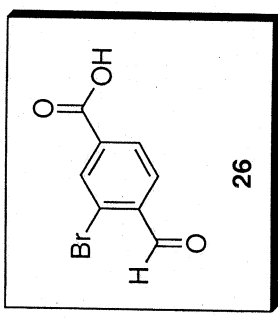

CWII-107H

10.392  
8.303  
8.300  
8.060  
8.058  
8.040  
8.038  
7.960  
7.939  
7.260

3.954

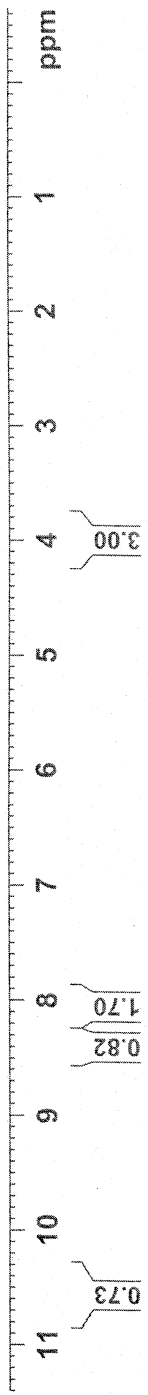

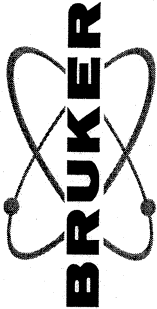

NAME CWII-107  
 EXPNO 3  
 PROCNO 1  
 Date 20090319  
 Time 11.44  
 INSTRUM spect  
 PROBHD 5 mm PABEO BB-  
 PULPROG zgpg30  
 TD 65536  
 SOLVENT CDC13  
 NS 68  
 DS 4  
 SWH 24038.461 Hz  
 FIDRES 0.366798 Hz  
 AQ 1.363198 sec  
 RG 2050  
 DW 20.800 usec  
 DE 6.50 usec  
 TE 293.4 K  
 D1 2.0000000 sec  
 D11 0.0300000 sec  
 TD0 1

===== CHANNEL f1 =====  
 NUC1 13C  
 P1 8.50 usec  
 PL1 -1.50 dB  
 PL1W 52.51238251 W  
 SFO1 100.6228298 MHz

===== CHANNEL f2 =====  
 CPDPRG2 waltz16  
 NUC2 1H  
 PCPD2 90.00 usec  
 PL2 -1.80 dB  
 PL12 17.28 dB  
 PL2W 21.67079544 W  
 PL12W 0.26783961 W  
 SFO2 400.1316005 MHz  
 SI 32768  
 SF 100.6127690 MHz  
 WDW no  
 SSB 0  
 TB 0.00 Hz  
 GB 0  
 PC 1.40

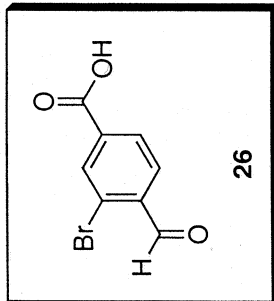

CWII-107C

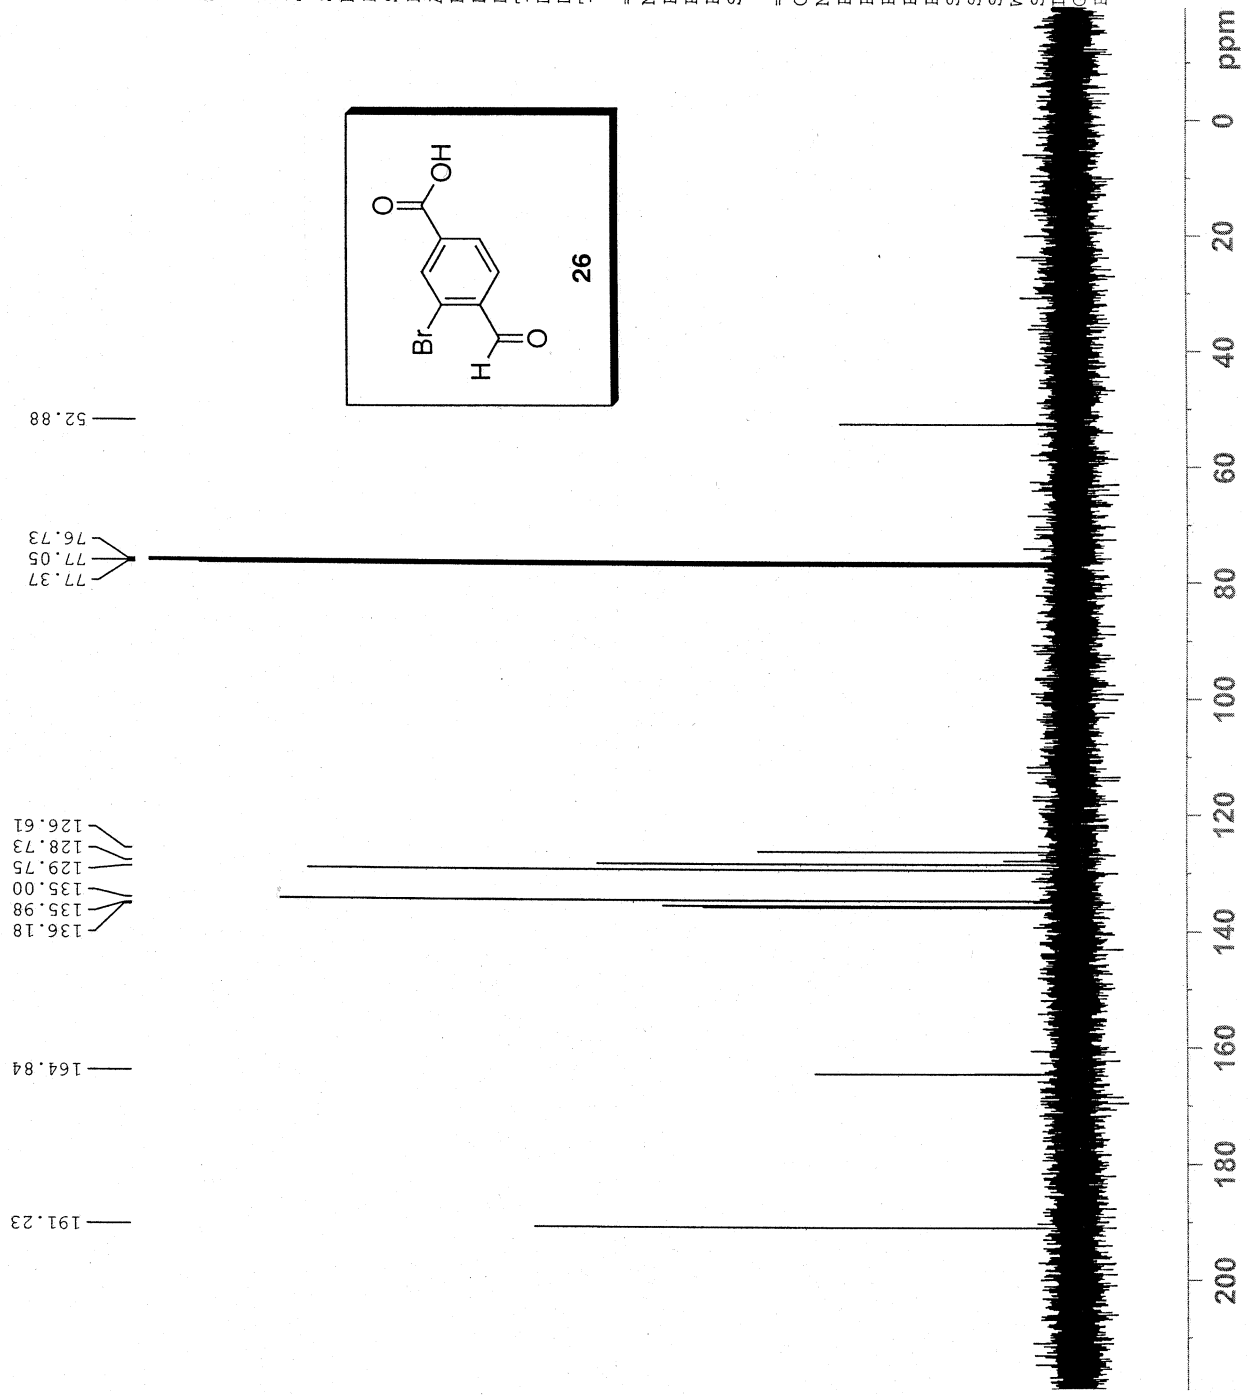

CWIII-071 ppt

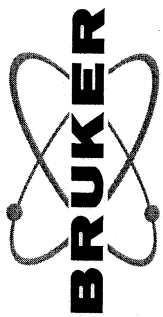

NAME CWIII-071  
 EXPNO 4  
 PROCNO 1  
 Date\_ 20091130  
 Time\_ 15.00  
 INSTRUM spect  
 PROBHD 5 mm PABEO BB-  
 PULPROG zg30  
 TD 65536  
 SOLVENT DMSO  
 NS 16  
 DS 2  
 SWH 8223.685 Hz  
 \*FIDRES 0.125483 Hz  
 AQ 3.9846387 sec  
 RG 4  
 DW 60.800 usec  
 DE 6.50 usec  
 TE 293.2 K  
 D1 1.00000000 sec  
 TD0 1

===== CHANNEL f1 =====  
 NUC1 1H  
 P1 10.00 usec  
 PL1 -1.80 dB  
 PL1W 21.67079544 W  
 SFO1 400.1324710 MHz  
 SI 32768  
 SF 400.1300044 MHz  
 WDW EM  
 SSB 0  
 LB 0.30 Hz  
 GB 0  
 PC 1.00

2.509  
 2.504  
 2.500  
 2.495  
 2.491

7.668  
 7.664  
 7.658  
 7.635  
 7.630  
 7.613

10.228

13.985

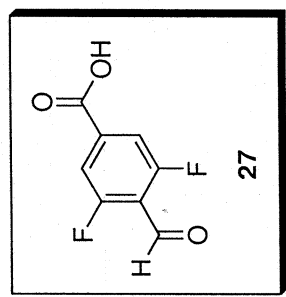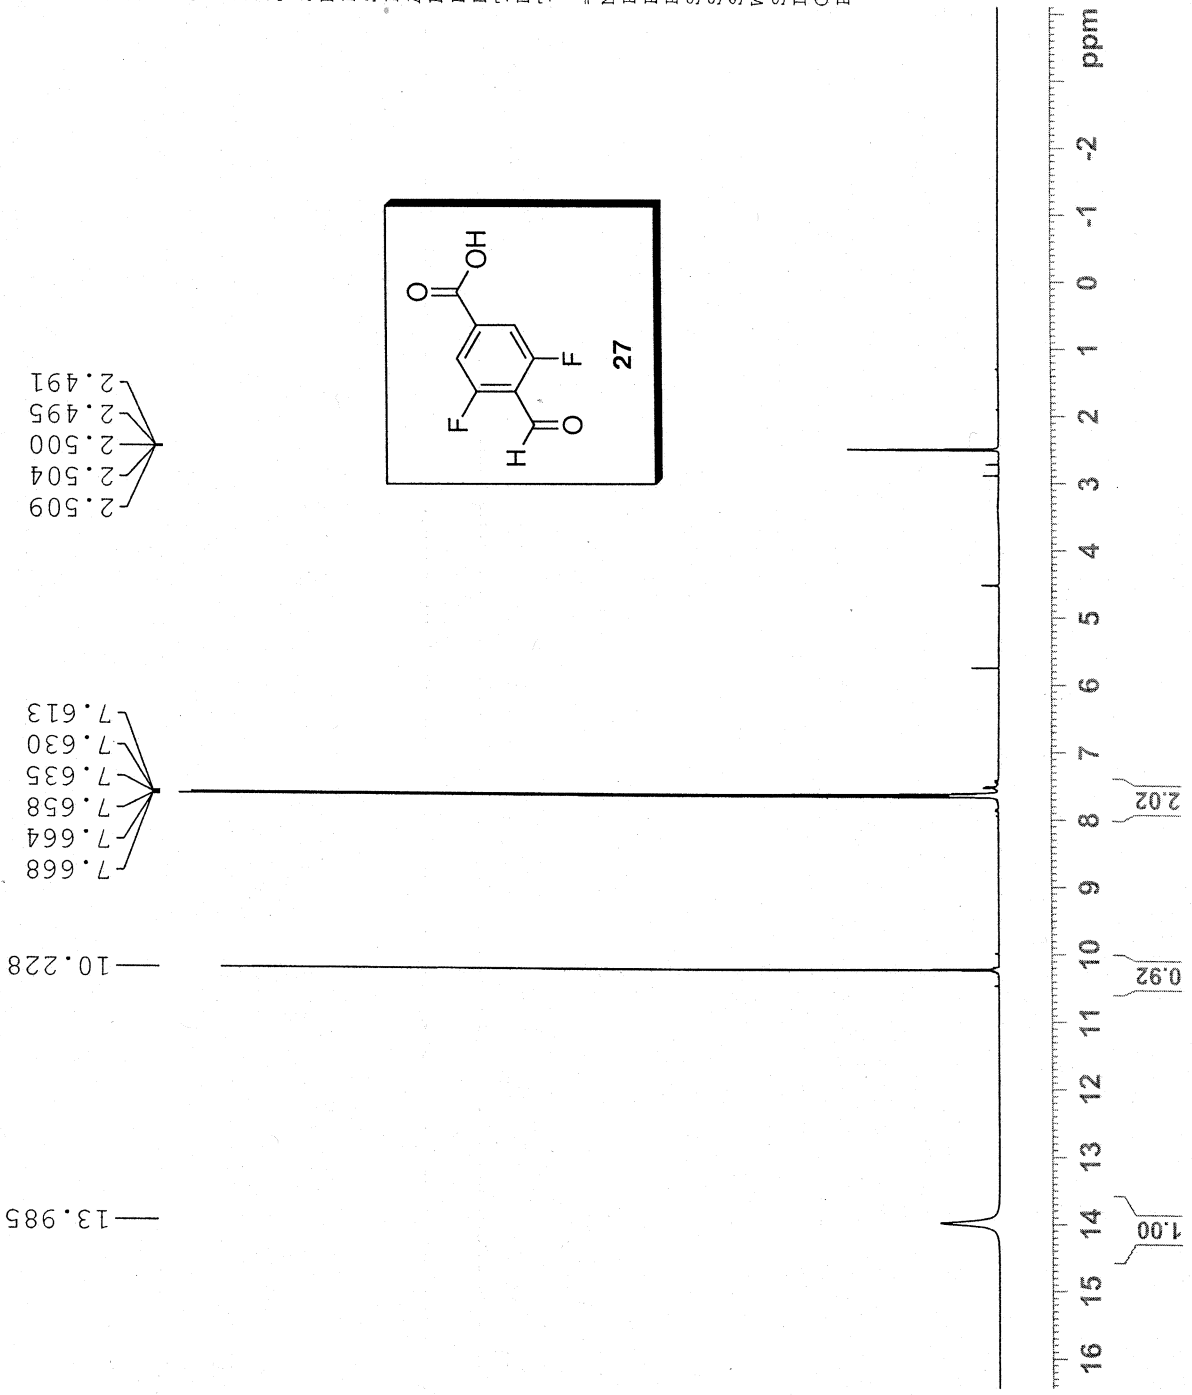

CWIII-071 ppt

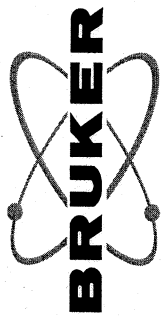

NAME CWIII-071  
 EXPNO 5  
 PROCNO 1  
 Date\_ 20091130  
 Time\_ 16.04  
 INSTRUM spect  
 PROBHD 5 mm PABBO BB-  
 PULPROG zgig30  
 TD 65536  
 SOLVENT DMSO  
 NS 1024  
 DS 4  
 SWH 24038.461 Hz  
 FIDRES 0.366798 Hz  
 AQ 1.3631988 sec  
 RG 2050  
 DW 20.800 usec  
 DE 6.50 usec  
 TE 293.5 K  
 D1 2.00000000 sec  
 D11 0.03000000 sec  
 TD0 1

===== CHANNEL f1 =====  
 NUC1 13C  
 P1 8.50 usec  
 PL1 -1.50 dB  
 PL1W 52.51238251 W  
 SFO1 100.6228298 MHz

===== CHANNEL f2 =====  
 CPDPRG2 waltz16  
 NUC2 1H  
 PCPD2 90.00 usec  
 PL2 -1.80 dB  
 PL12 17.28 dB  
 PL2W 21.67079544 W  
 PL12W 0.26783961 W  
 SFO2 400.1316005 MHz  
 SI 32768  
 SF 100.6128098 MHz  
 WDW EM  
 SSB 0  
 LB 1.00 Hz  
 GB 0  
 PC 1.40

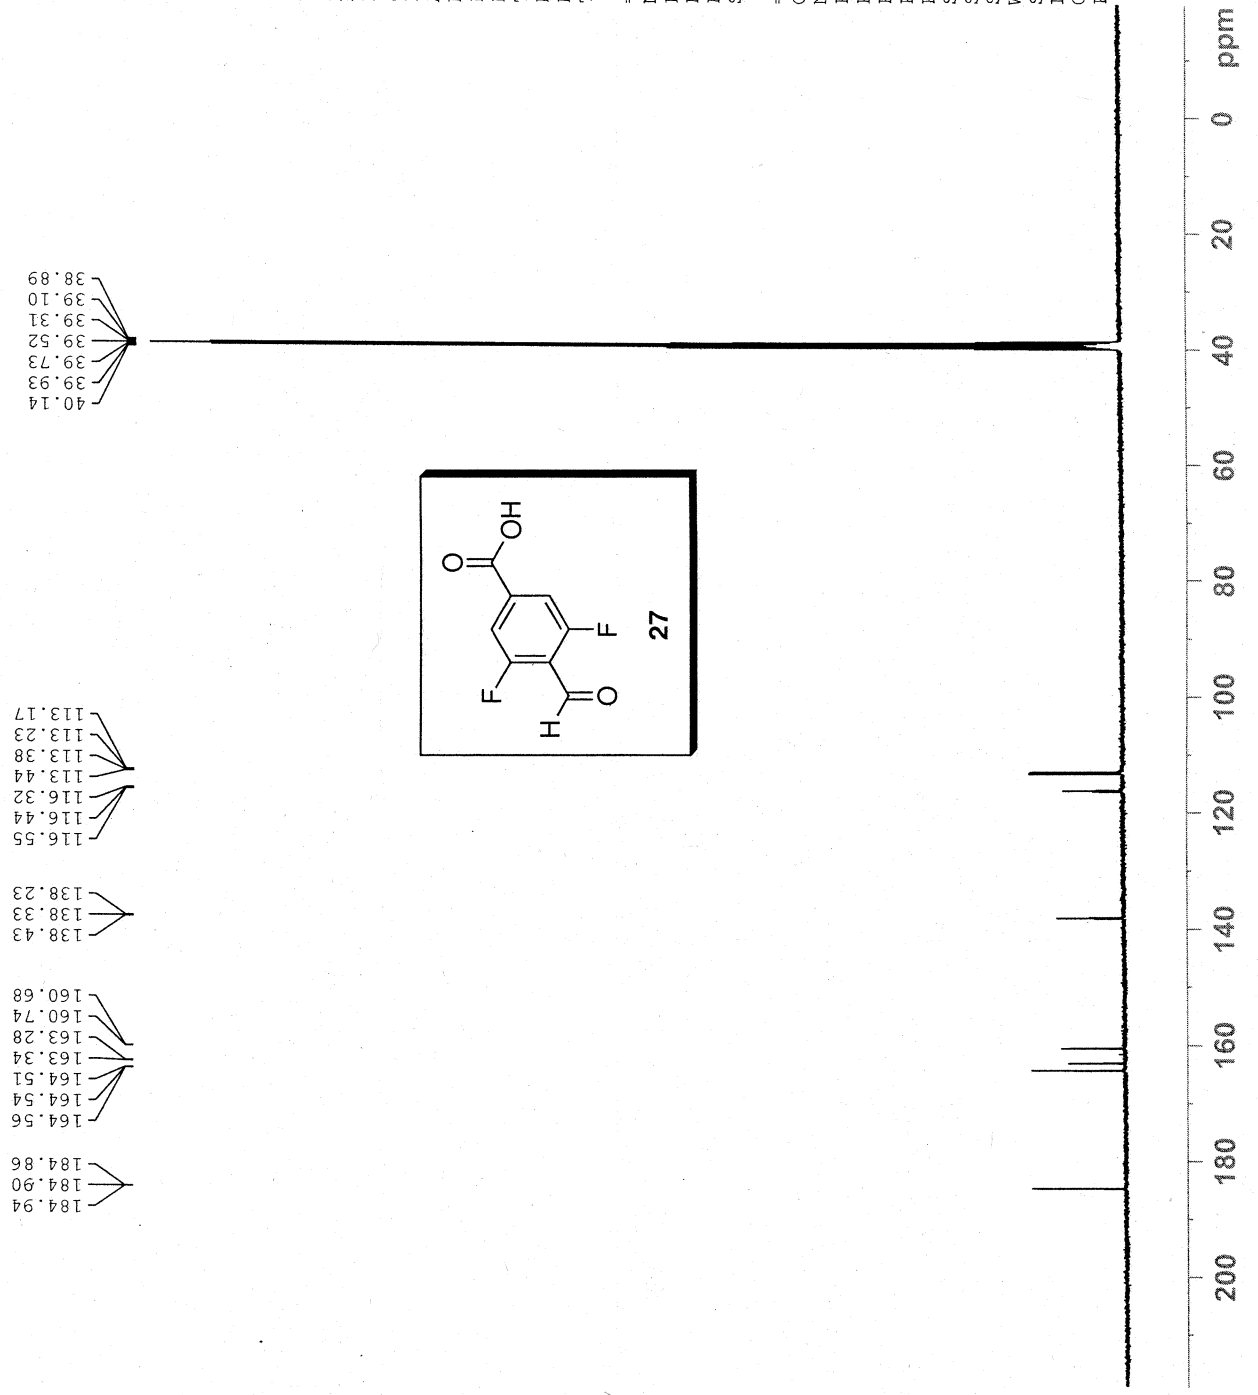

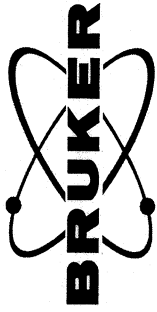

CWII-087  
NAME CWII-087  
EXPNO 2  
PROCNO 1  
Date\_ 20090328  
Time\_ 19.39  
INSTRUM spect  
PROBHD 5 mm PABBO BB-  
PULPROG zg30  
TD 65536  
SOLVENT CDCl3  
NS 16  
DS 2  
SWH 8223.685 Hz  
FIDRES 0.125483 Hz  
AQ 3.9846387 sec  
RG 4  
DW 60.800 usec  
DE 6.50 usec  
TE 298.2 K  
D1 1.0000000 sec  
TD0 1

==== CHANNEL f1 =====  
NUC1 1H  
P1 10.00 usec  
PL1 -1.80 dB  
PL1W 21.67079544 W  
SF01 400.1324710 MHz  
SI 32768  
SF 400.1300106 MHz  
WDW EM  
SSB 0  
LB 0.30 Hz  
GB 0  
PC 1.00

CWII-087H

10.518  
8.168  
8.166  
8.165  
8.146  
8.142  
8.039  
8.036  
8.030  
8.026  
7.985  
7.965  
7.464  
7.448  
7.445  
7.436  
7.432  
7.415  
7.411  
7.401  
7.397  
7.392  
7.385  
7.375  
7.260  
5.396

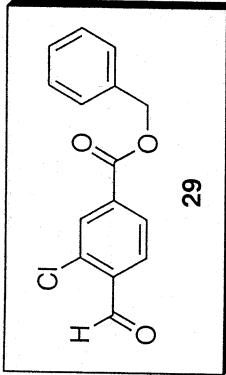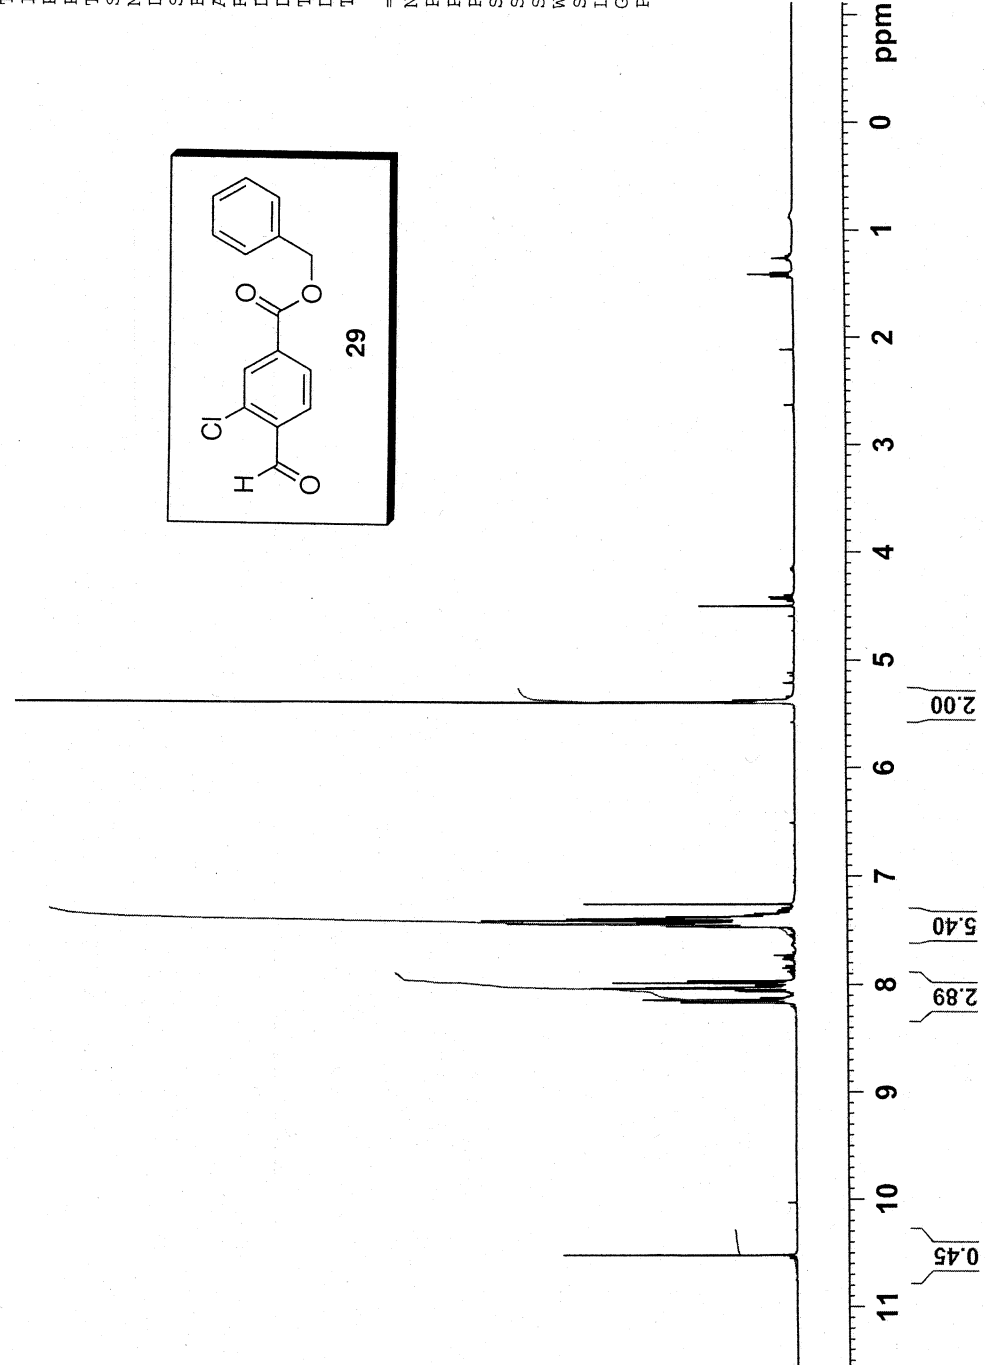



CWII-087C

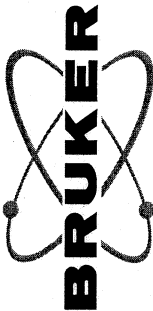

NAME CWII-087  
 EXPNO 3  
 PROCNO 1  
 Date\_ 20090328  
 Time\_ 19.44  
 INSTRUM spect  
 PROBHD 5 mm PABBO BB-  
 PULPROG zgig30  
 TD 65536  
 SOLVENT CDC13  
 NS 64  
 DS 4  
 SWH 24038.461 Hz  
 FIDRES 0.366798 Hz  
 AQ 1.3631988 sec  
 RG 2050  
 DW 20.800 usec  
 DE 6.50 usec  
 TE 298.3 K  
 D1 2.00000000 sec  
 D11 0.03000000 sec  
 TDO 1

===== CHANNEL f1 =====  
 NUC1 13C  
 P1 8.50 usec  
 PL1 -1.50 dB  
 PL1W 52.51238251 W  
 SFO1 100.6228298 MHz  
 ===== CHANNEL f2 =====  
 CPDPRG2 waltz16  
 NUC2 1H  
 PCPD2 90.00 usec  
 PL2 -1.80 dB  
 PL12 17.28 dB  
 PL2W 21.67079544 W  
 PL12W 0.26783961 W  
 SFO2 400.1316005 MHz  
 SI 32768  
 SF 100.6127736 MHz  
 WDW EM  
 SSB 0  
 LB 1.00 Hz  
 GB 0  
 FC 1.40

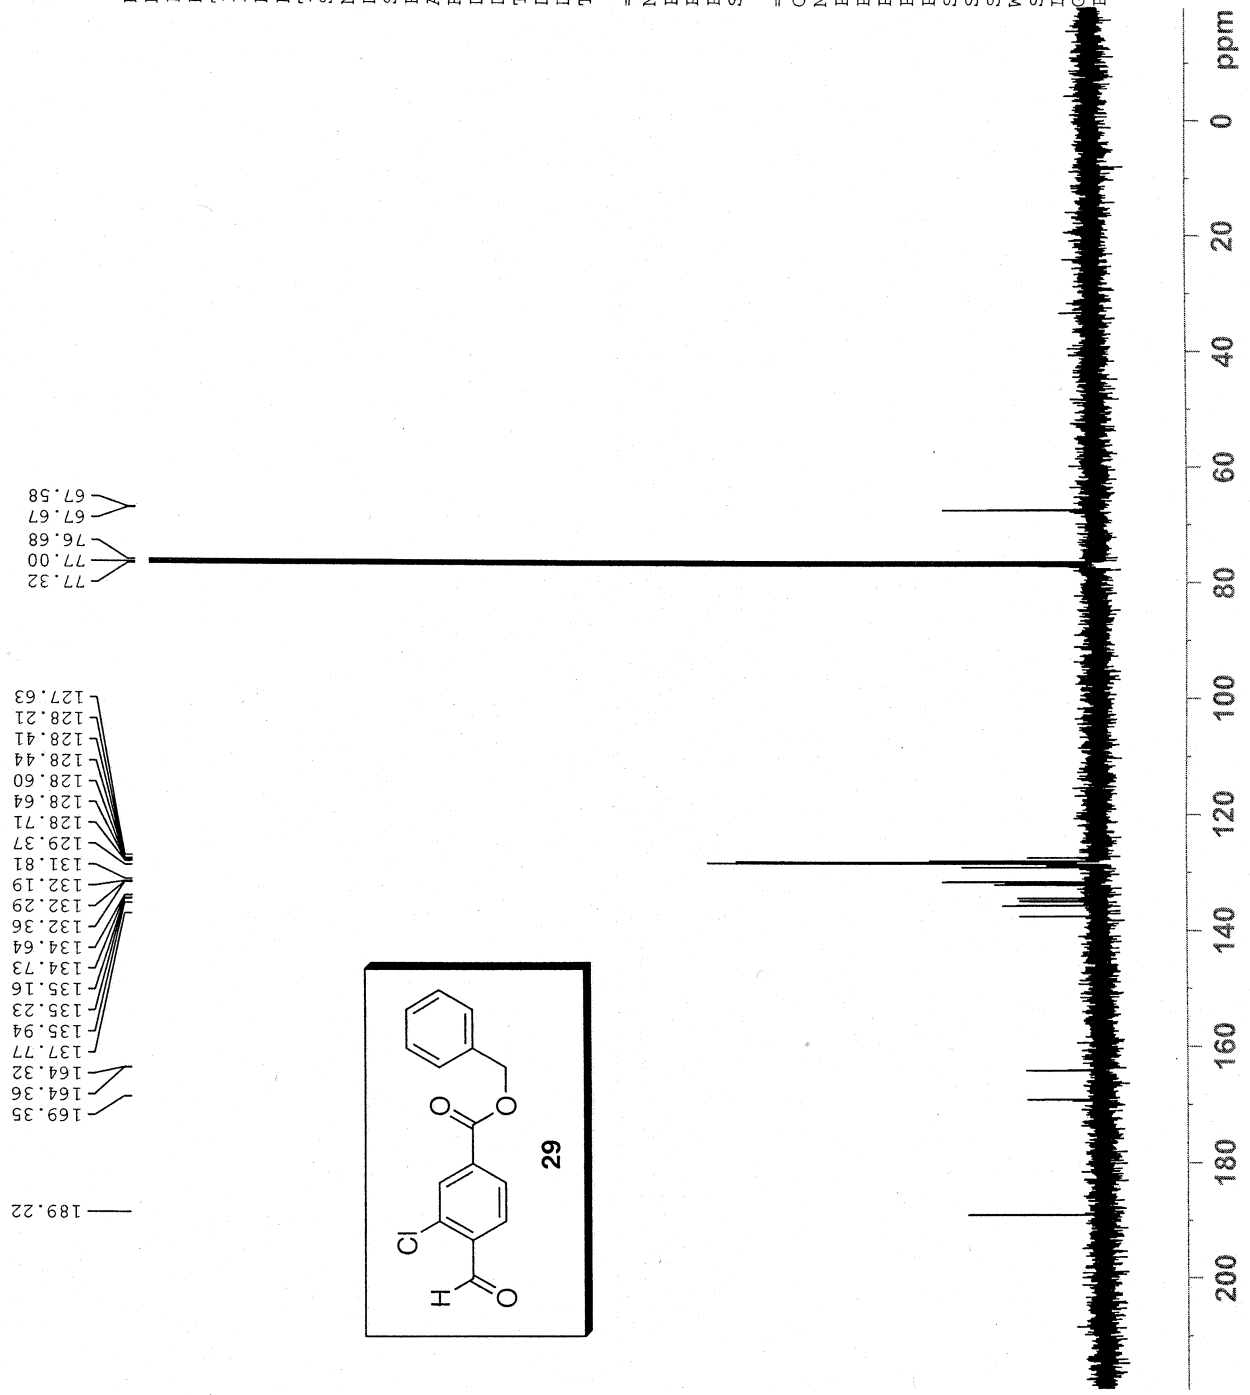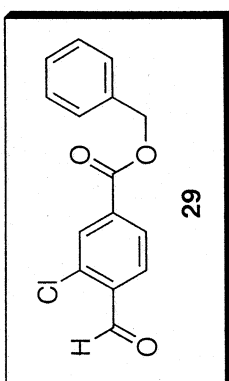

CWII-109H

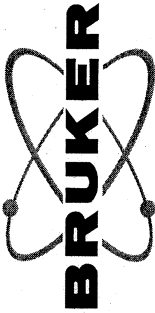

NAME CWII-109  
 EXPNO 2  
 PROCNO 1  
 Date\_ 20090327  
 Time\_ 19.59  
 INSTRUM spect  
 PROBD 5 mm PABBO BB-  
 PULPROG zg30  
 TD 65536  
 SOLVENT CDC13  
 NS 16  
 DS 2  
 SWH 8223.685 Hz  
 FIDRES 0.125483 Hz  
 AQ 3.9846387 sec  
 RG 4  
 DW 60.800 usec  
 DE 6.50 usec  
 TE 298.0 K  
 D1 1.00000000 sec  
 TD0 1

===== CHANNEL f1 =====  
 NUC1 1H  
 P1 10.00 usec  
 PL1 -1.80 dB  
 PL1W 21.67079544 W  
 SF01 400.1324710 MHz  
 SI 32768  
 SF 400.1300106 MHz  
 WDW EM  
 SSB 0  
 LB 0.30 Hz  
 GB 0  
 PC 1.00

4.502  
 5.394  
 7.260  
 7.344  
 7.362  
 7.365  
 7.376  
 7.385  
 7.388  
 7.392  
 7.397  
 7.402  
 7.405  
 7.411  
 7.416  
 7.418  
 7.422  
 7.432  
 7.437  
 7.444  
 7.447  
 7.464  
 7.468  
 7.948  
 7.968  
 8.078  
 8.080  
 8.082  
 8.084  
 8.098  
 8.101  
 8.102

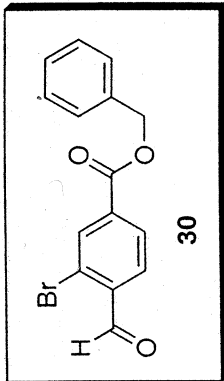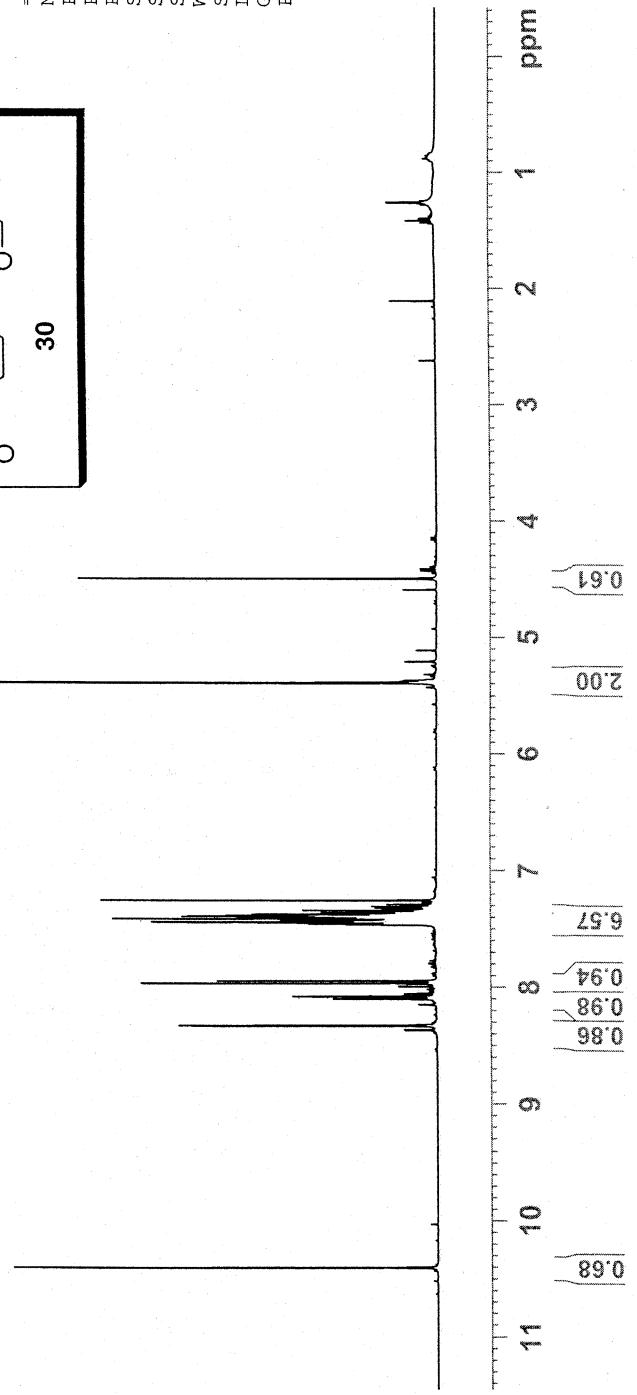

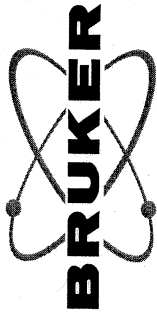

CWII-109  
NAME  
EXPNO 3  
PROCNO 1  
Date 20090327  
Time 20.06  
INSTRUM spect  
PROBHD 5 mm PABBO BB-  
PULPROG zg1930  
TD 65536  
SOLVENT CDCl3  
NS 64  
DS 4  
SWH 24038.461 Hz  
FIDRES 0.366798 Hz  
AQ 1.3631988 sec  
RG 2050  
DW 20.800 usec  
DE 6.50 usec  
TE 298.2 K  
D1 2.00000000 sec  
D11 0.03000000 sec  
TD0 1

==== CHANNEL f1 =====  
NUC1 13C  
P1 8.50 usec  
PL1 -1.50 dB  
PL1W 52.51238251 W  
SFO1 100.6228298 MHz

==== CHANNEL f2 =====  
CPDPRG2 waltz16  
NUC2 1H  
PCPD2 90.00 usec  
PL2 -1.80 dB  
PL12 17.28 dB  
PL2W 21.67079544 W  
PL12W 0.26783961 W  
SFO2 400.1316005 MHz  
SI 32768  
SF 100.6127729 MHz  
WDM EM  
SSB 0  
LB 1.00 Hz  
GB 0  
PC 1.40

CWII-109C

191.17  
164.19  
136.25  
136.00  
135.19  
135.03  
129.74  
129.00  
128.82  
128.77  
128.72  
128.64  
128.46  
128.39  
126.57  
77.32  
77.00  
76.68  
67.67  
33.53

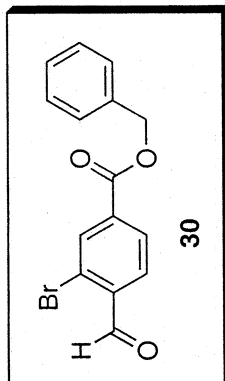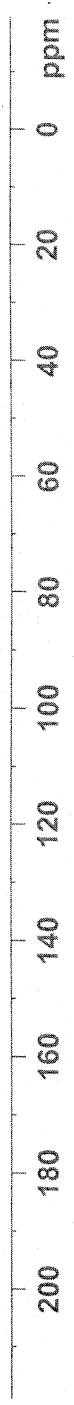

CWIII-073

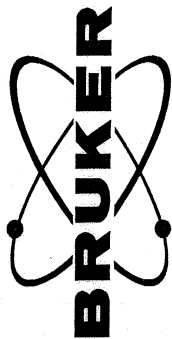

NAME CWIII-073  
 EXPNO 4  
 PROCNO 1  
 Date 20120423  
 Time 21.26  
 INSTRUM spect  
 PROBHD 5 mm PABBO BB-  
 PULPROG zg30  
 TD 65536  
 SOLVENT CDCl3  
 NS 2048  
 DS 2  
 SWH 8223.685 Hz  
 FIDRES 0.125483 Hz  
 AQ 3.9846387 sec  
 RG 4  
 DW 60.800 usec  
 DE 6.50 usec  
 TE 292.8 K  
 D1 1.00000000 sec  
 TD0 1

===== CHANNEL f1 =====  
 NUC1 1H  
 P1 14.00 usec  
 PL1 0.50 dB  
 PLLW 12.76071072 W  
 SFO1 400.1324710 MHz  
 SI 32768  
 SF 400.1300101 MHz  
 WDW EM  
 SSB 0  
 LB 0.30 Hz  
 GB 0  
 PC 1.00

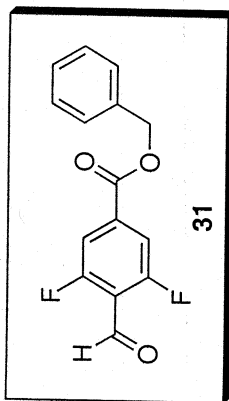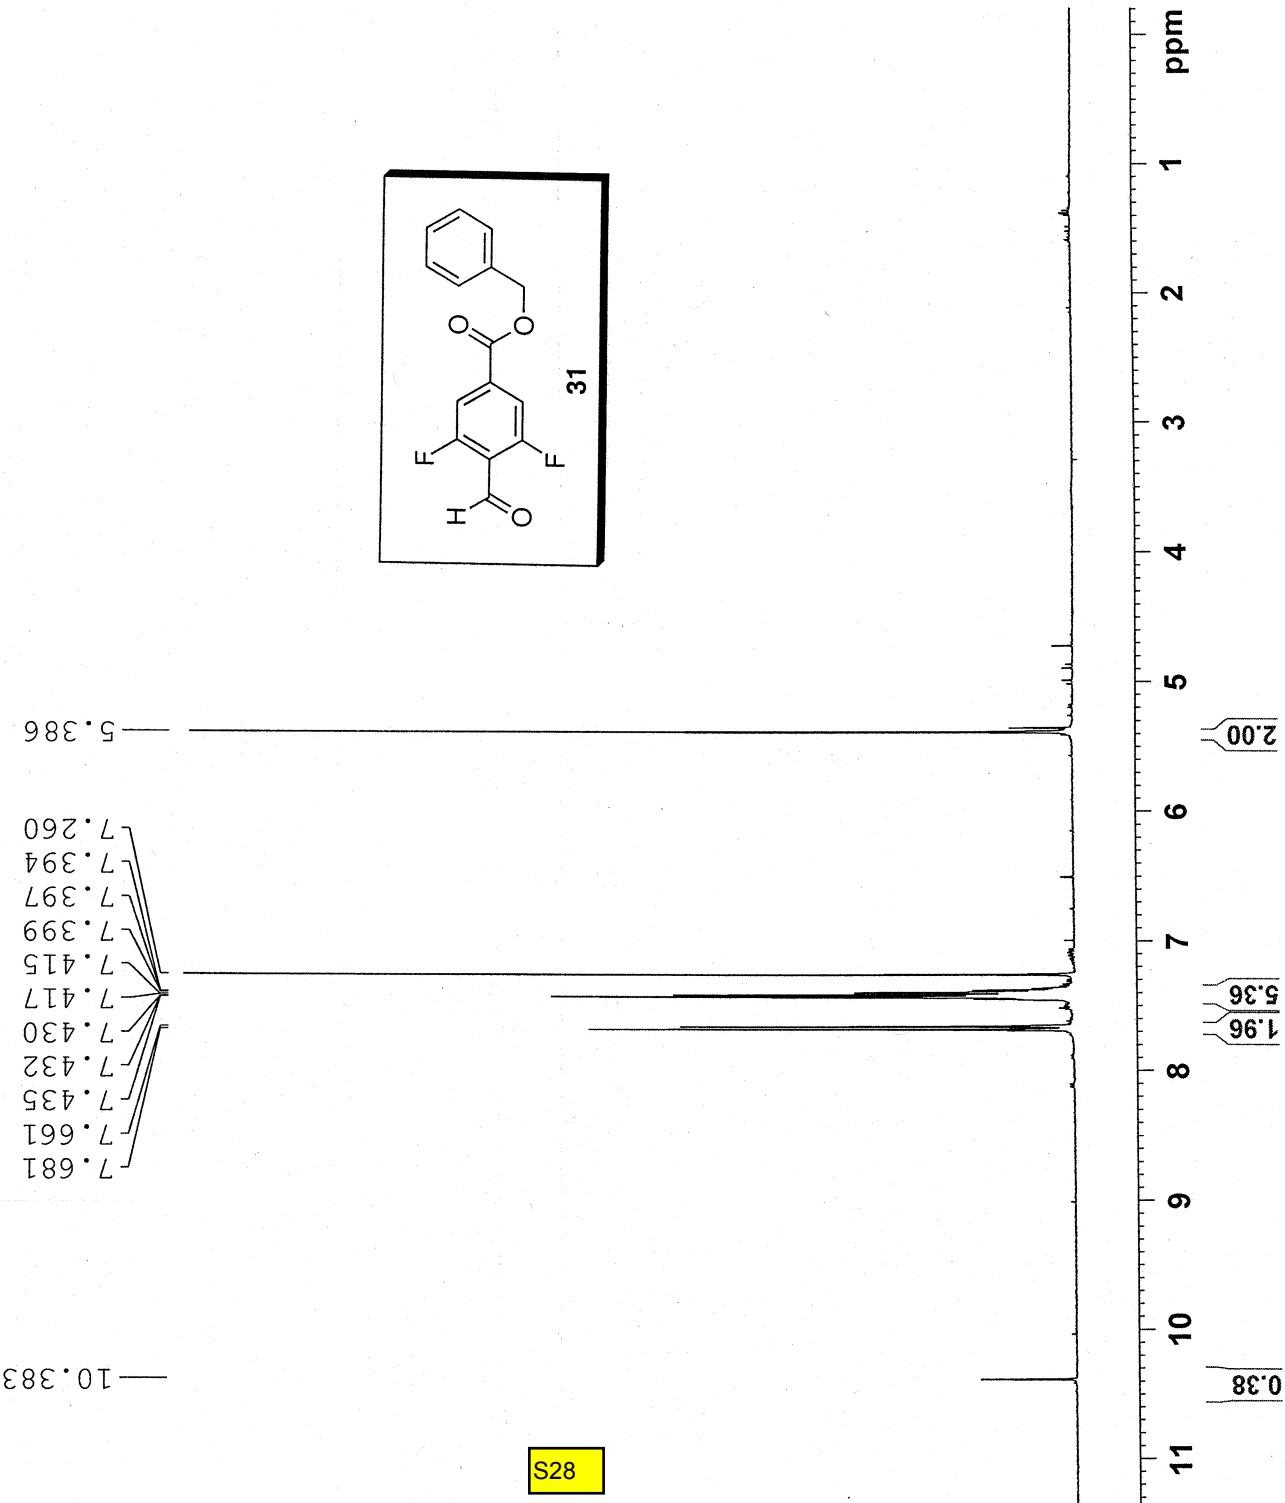

S28

CWIII-073

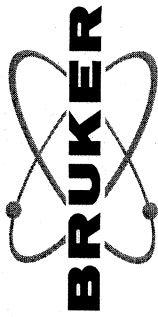

NAME CWIII-073  
 EXPNO 2  
 PROCNO 1  
 Date\_ 20091202  
 Time\_ 16.19  
 INSTRUM spect  
 PROBHD 5 mm PABBO BB-  
 PULPROG zgig30  
 TD 65536  
 SOLVENT CDCl3  
 NS 1024  
 DS 4  
 SWH 24038.461 Hz  
 FIDRES 0.366798 Hz  
 AQ 1.3631988 sec  
 RG 2050  
 DW 20.800 usec  
 DE 6.50 usec  
 TE 293.4 K  
 D1 2.0000000 sec  
 D11 0.0300000 sec  
 TDO 1

==== CHANNEL f1 =====  
 NUC1 13C  
 P1 8.50 usec  
 PL1 -1.50 dB  
 PL1W 52.51238251 W  
 SF01 100.6228298 MHz

==== CHANNEL f2 =====  
 CPDPRG2 waltz16  
 NUC2 1H  
 PCPD2 90.00 usec  
 PL2 -1.80 dB  
 PL12 17.28 dB  
 PL2W 21.67079544 W  
 PL12W 0.26783961 W  
 SF02 400.1316005 MHz  
 SI 32768  
 SF 100.6127744 MHz  
 WDW EM  
 SSB 0  
 LB 1.00 Hz  
 GB 0  
 PC 1.40

186.24  
 186.21  
 184.04  
 184.00  
 184.00  
 183.96  
 164.05  
 164.00  
 163.18  
 163.15  
 163.12  
 161.43  
 161.37  
 137.40  
 137.29  
 137.19  
 134.81  
 134.66  
 128.78  
 128.76  
 128.71  
 128.71  
 128.70  
 128.51  
 128.41  
 116.89  
 116.78  
 116.67  
 113.81  
 113.78  
 113.75  
 113.60  
 113.57  
 113.54  
 113.03  
 107.91  
 107.66  
 77.32  
 77.00  
 76.68  
 68.42  
 68.03

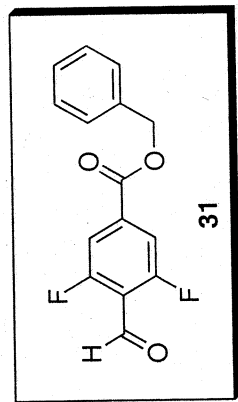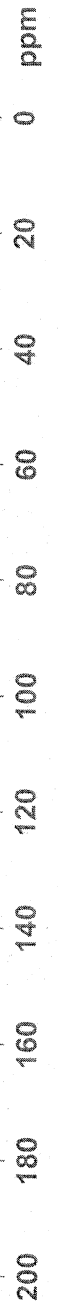

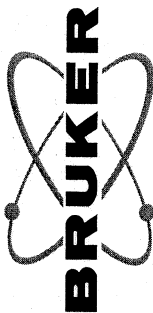

CWII-093H

10.706  
 8.174  
 8.171  
 8.068  
 8.048  
 8.036  
 8.033  
 8.016  
 8.012  
 7.471  
 7.467  
 7.462  
 7.451  
 7.447  
 7.442  
 7.438  
 7.433  
 7.428  
 7.423  
 7.417  
 7.413  
 7.403  
 7.398  
 7.392  
 7.388  
 7.384  
 7.376  
 7.260  
 5.399

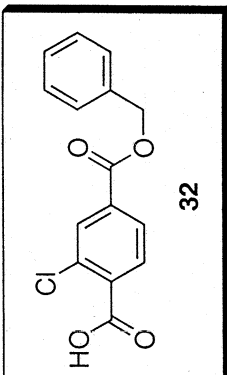

NAME CWII-093  
 EXPNO 2  
 PROCNO 1  
 Date\_ 20090507  
 Time\_ 20.04  
 INSTRUM spect  
 PROBHD 5 mm PABBO BB-  
 PULPROG zg30  
 TD 65536  
 SOLVENT CDCl3  
 NS 16  
 DS 2  
 SWH 8223.685 Hz  
 FIDRES 0.125483 Hz  
 AQ 3.9846387 sec  
 RG 4  
 DW 60.800 usec  
 DE 6.50 usec  
 TE 295.1 K  
 D1 1.00000000 sec  
 TD0 1

===== CHANNEL f1 =====  
 NUC1 1H  
 P1 10.00 usec  
 PL1 -1.80 dB  
 PL1W 21.67079544 W  
 SF01 400.1324710 MHz  
 SI 32768  
 SF 400.1300106 MHz  
 WDW EM  
 SSB 0  
 LB 0.30 Hz  
 GB 0  
 FC 1.00

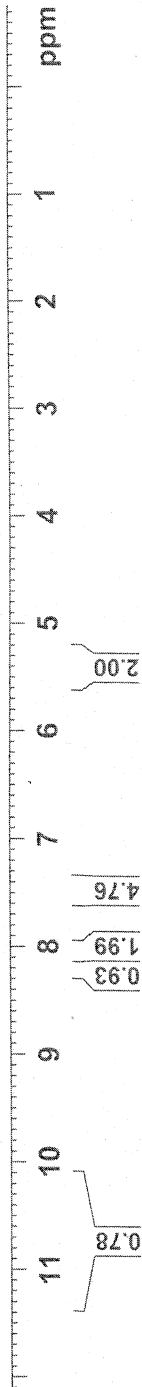

CWII-093C

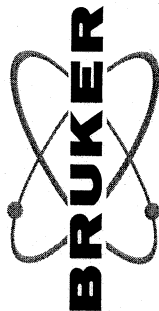

CWII-093  
 NAME  
 EXNO 3  
 PROCNO 1  
 Date 20090507  
 Time\_ 20.14  
 INSTRUM spect  
 PROBHD 5 mm PABBO BB-  
 PULPROG zgig30  
 TD 65536  
 SOLVENT CDC13  
 NS 178  
 DS 4  
 SWH 24038.461 Hz  
 FIDRES 0.366798 Hz  
 AQ 1.3631988 sec  
 RG 2050  
 DW 20.800 usec  
 DE 6.50 usec  
 TE 295.4 K  
 D1 2.00000000 sec  
 D11 0.03000000 sec  
 TDO 1

=====  
 CHANNEL f1  
 NUC1 13C  
 P1 8.50 usec  
 PL1 -1.50 dB  
 PL1W 52.51238251 W  
 SFO1 100.6228298 MHz

=====  
 CHANNEL f2  
 CPDPRG2 waltz16  
 NUC2 1H  
 PCPD2 90.00 usec  
 PL2 -1.80 dB  
 PL12 17.28 dB  
 PL2W 21.67079544 W  
 PL12W 0.26783961 W  
 SFO2 400.1316005 MHz  
 SI 32768  
 SF 100.6127744 MHz  
 WDW EM  
 SSB 0  
 LB 1.00 Hz  
 GB 0  
 PC 1.40

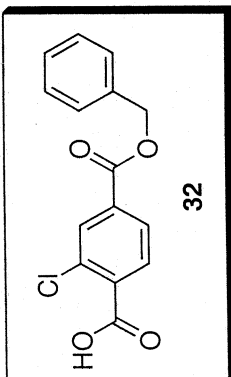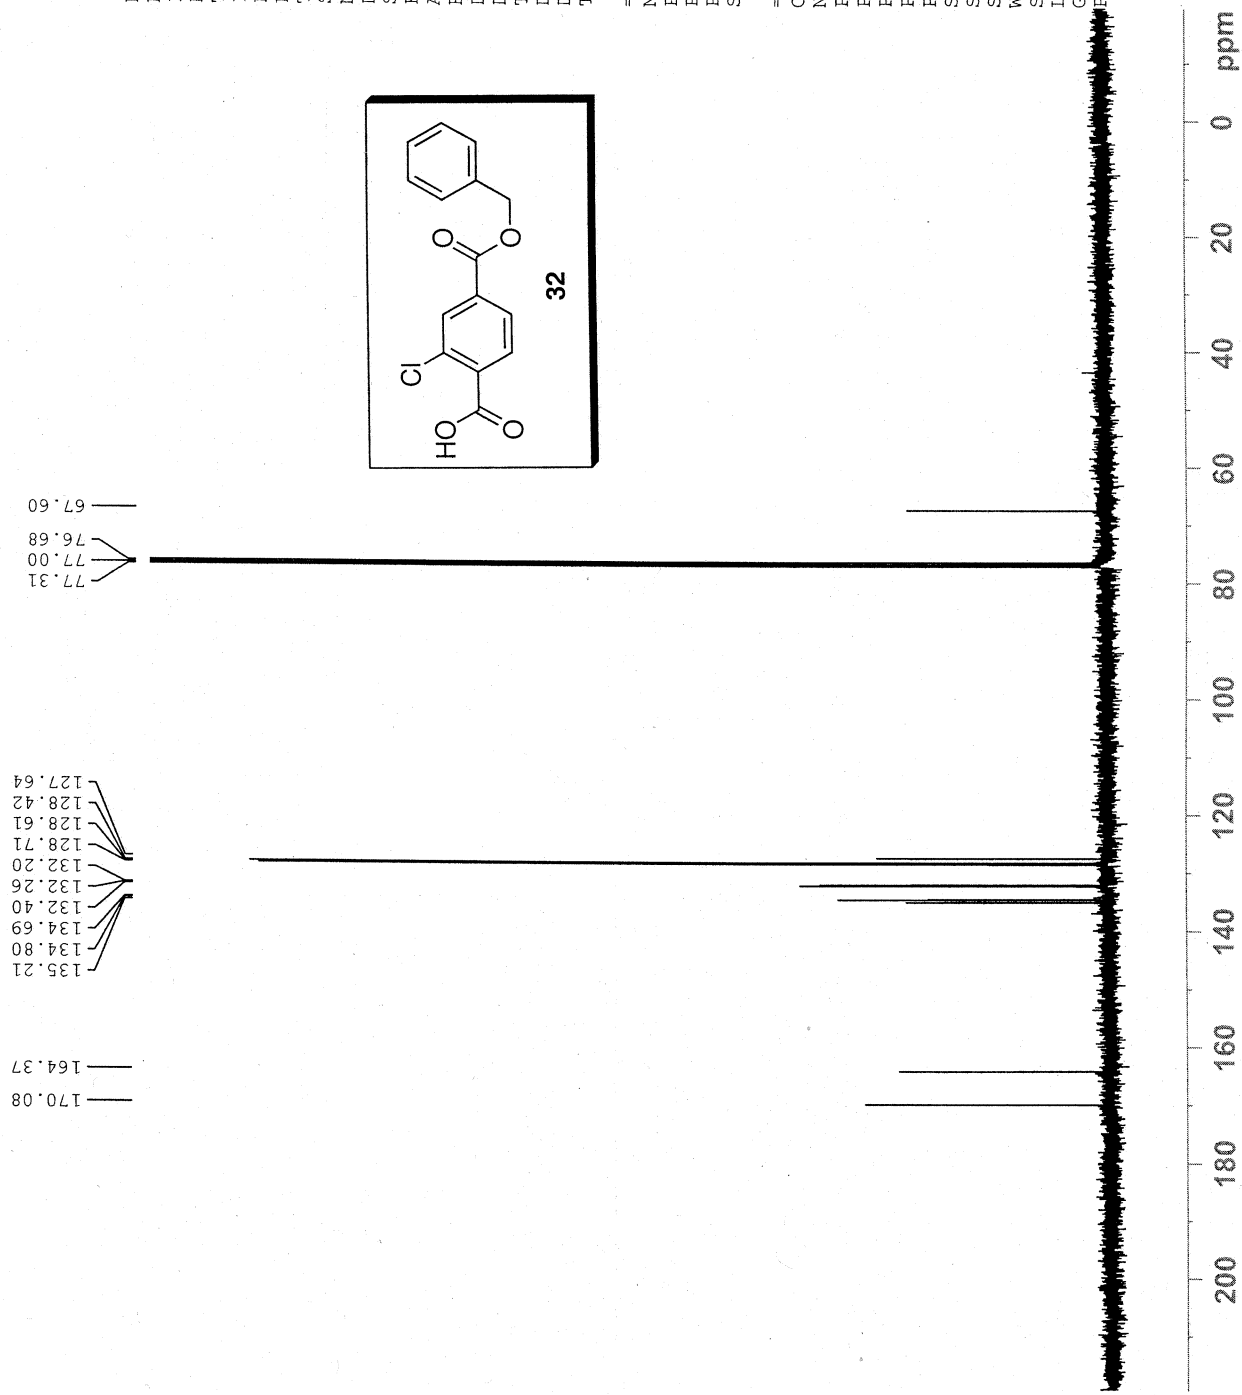

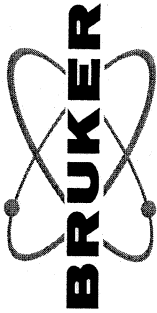

CWII-113  
NAME  
EXPNO 1  
PROCNO 1  
Date 20090717  
Time 13.16  
INSTRUM spect  
PROBHD 5 mm PABBO BB-  
PULPROG zg30  
TD 65536  
SOLVENT CDCl3  
NS 16  
DS 2  
SWH 8223.685 Hz  
FIDRES 0.125483 Hz  
AQ 3.9846387 sec  
RG 4  
DW 60.800 usec  
DE 6.50 usec  
TE 292.0 K  
DI 1.00000000 sec  
TD0 1

===== CHANNEL f1 =====  
NUC1 1H  
P1 10.00 usec  
PL1 -1.80 dB  
PL1W 21.67079544 W  
SFO1 400.1324710 MHz  
SI 32768  
SF 400.1300111 MHz  
WDW EM  
SSB 0  
LB 0.30 Hz  
GB 0  
PC 1.00

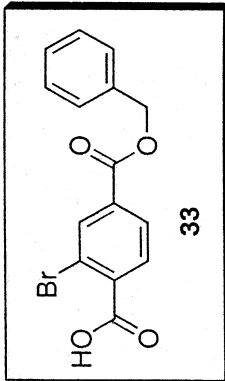

CWII-113

8.379  
8.375  
8.088  
8.085  
8.068  
8.064  
8.026  
8.006  
7.470  
7.465  
7.460  
7.449  
7.445  
7.437  
7.432  
7.427  
7.422  
7.416  
7.412  
7.402  
7.397  
7.392  
7.387  
7.375  
7.260  
5.394

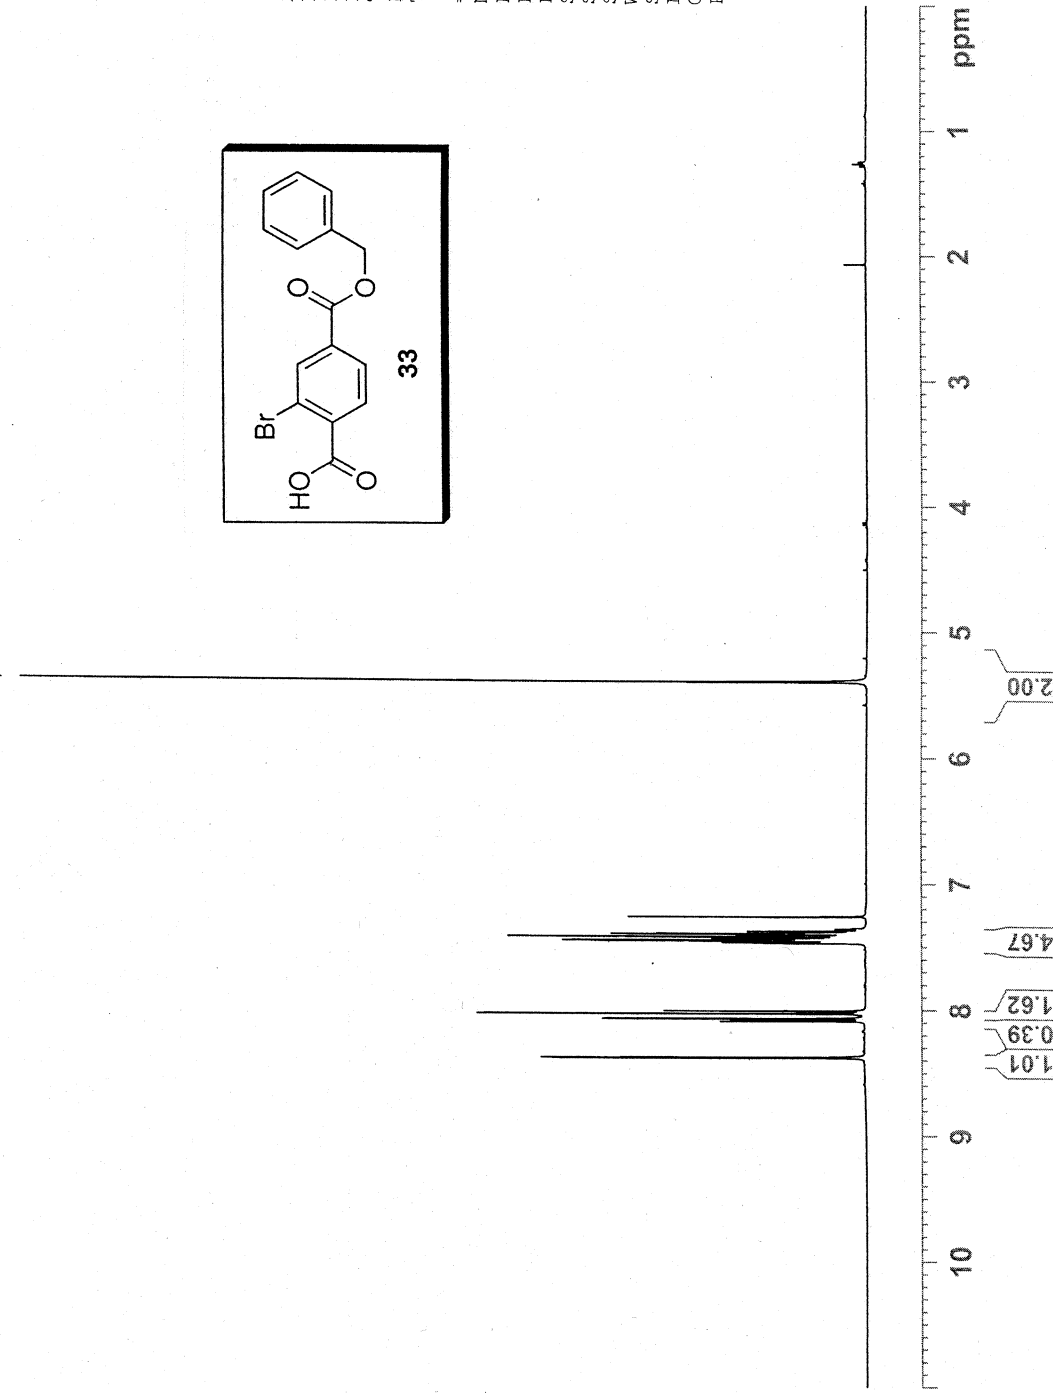



CWII-113

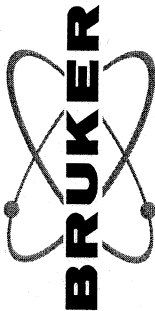

NAME CWII-113  
 EXPNO 2  
 PROCNO 1  
 Date 20090717  
 Time 13.42  
 INSTRUM spect  
 PROBHD 5 mm PABBO BB  
 PULPROG zgpg30  
 TD 65536  
 SOLVENT CDCl3  
 NS 138  
 DS 4  
 SWH 24038.461 Hz  
 FIDRES 0.366798 Hz  
 AQ 1.3631988 sec  
 RG 2050  
 DW 20.800 usec  
 DE 6.50 usec  
 TE 292.5 K  
 D1 2.00000000 sec  
 D11 0.03000000 sec  
 TDO 1

===== CHANNEL f1 =====  
 NUC1 13C  
 P1 8.50 usec  
 PL1 -1.50 dB  
 PL1W 52.51238251 W  
 SFO1 100.6228298 MHz

===== CHANNEL f2 =====  
 CPDPRG2 waltz16  
 NUC2 1H  
 PCPD2 90.00 usec  
 PL2 -1.80 dB  
 PL12 17.28 dB  
 PL2W 21.67079544 W  
 PL12W 0.26783961 W  
 SFO2 400.1316005 MHz  
 SI 32768  
 SF 100.6127744 MHz  
 WDW EM  
 SSB 0  
 LB 1.00 Hz  
 GB 0  
 PC 1.40

77.32  
 77.00  
 76.69  
 67.60

135.68  
 135.20  
 134.48  
 134.28  
 132.10  
 128.71  
 128.61  
 128.45  
 128.26  
 122.32

170.32  
 164.27

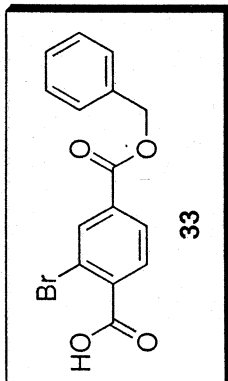

S33

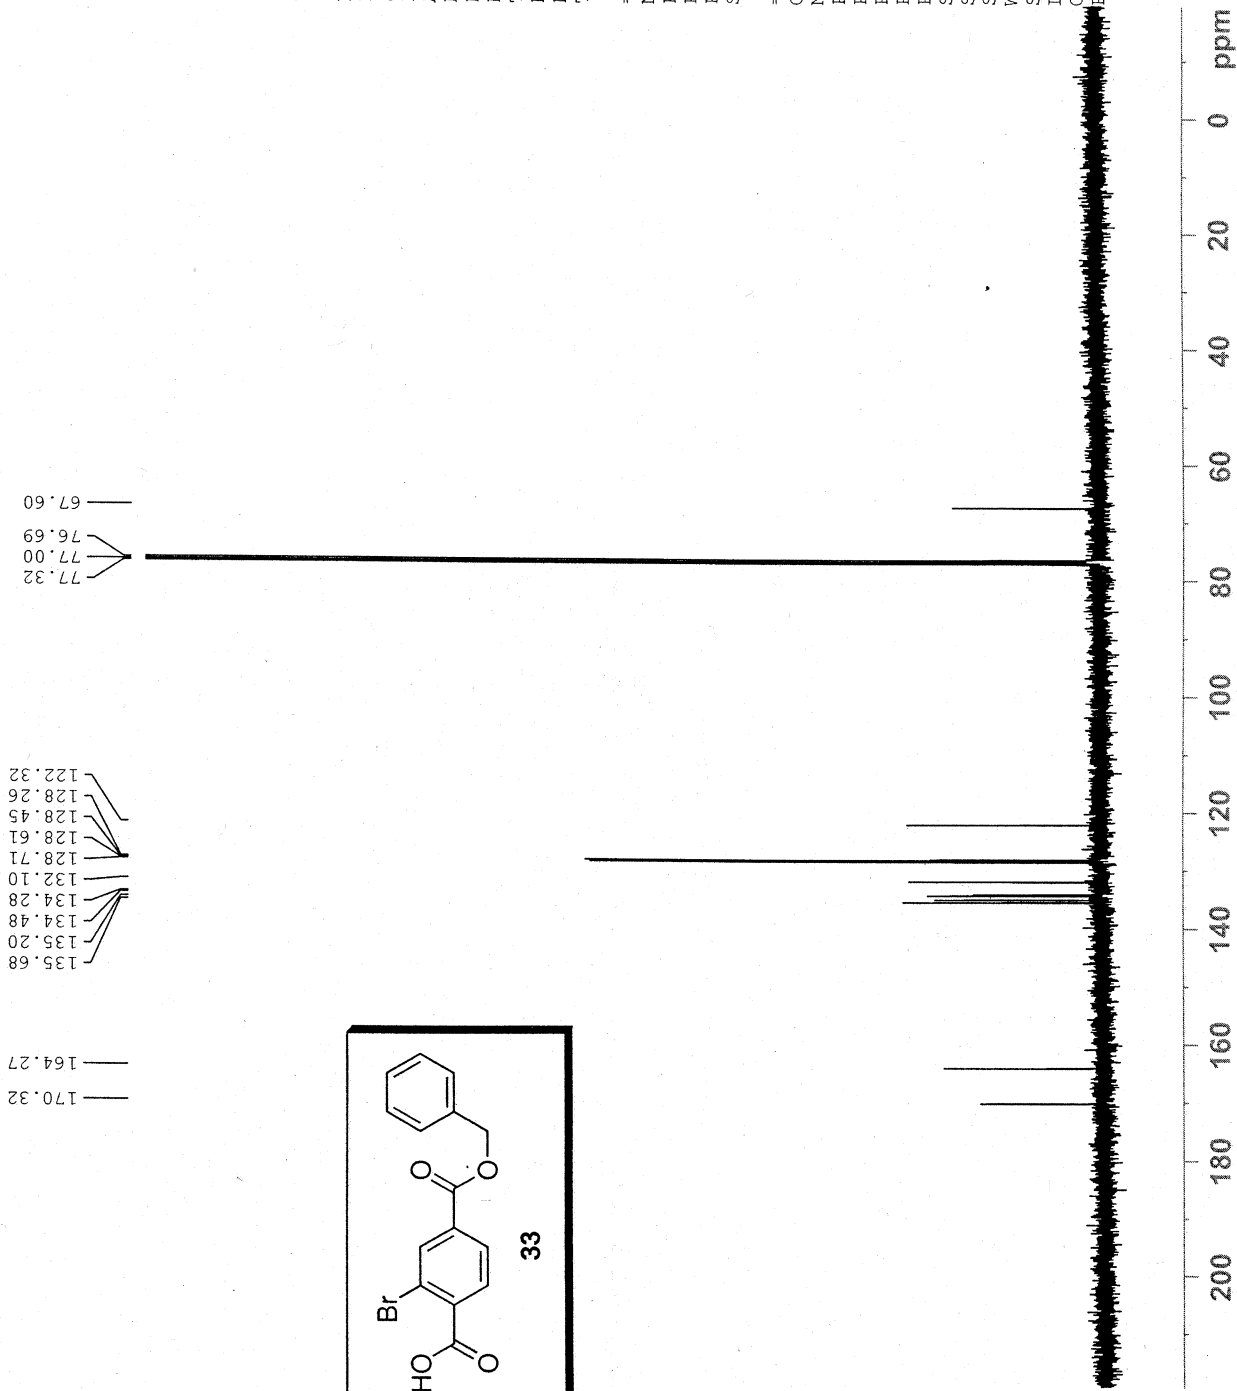

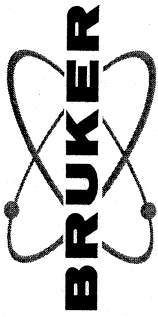

NAME CWIII-075  
 EXPNO 3  
 PROCNO 1  
 Date\_ 20110314  
 Time\_ 15.33  
 INSTRUM spect  
 PROBHD 5 mm PABBO BB-  
 PULPROG zg30  
 TD 65536  
 SOLVENT CDCl3  
 NS 16  
 DS 2  
 SWH 8223.685 Hz  
 FIDRES 0.125483 Hz  
 AQ 3.9846387 sec  
 RG 4  
 DW 60.800 usec  
 DE 6.50 usec  
 TE 293.2 K  
 D1 1.00000000 sec  
 TDO 1

===== CHANNEL f1 =====  
 NUC1 1H  
 P1 10.00 usec  
 PL1 -1.80 dB  
 PL1W 21.67079544 W  
 SF01 400.1324710 MHz  
 SI 32768  
 SF 400.1300106 MHz  
 WDW EM  
 SSB 0  
 LB 0.30 Hz  
 GB 0  
 PC 1.00

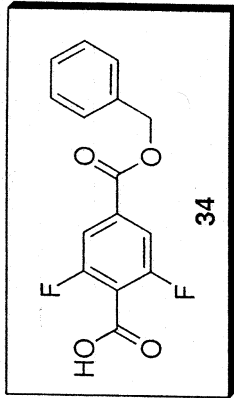

CWIII-075

9.826  
 7.686  
 7.666  
 7.439  
 7.432  
 7.422  
 7.417  
 7.411  
 7.401  
 7.398  
 7.396  
 7.391  
 7.380  
 7.260  
 5.391

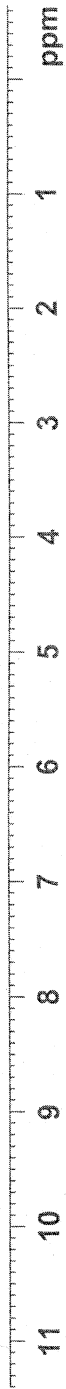

CWIII-075

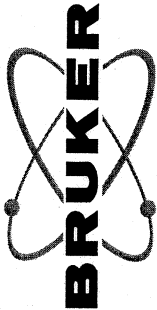

CWIII-075  
 NAME  
 EXPNO 4  
 PROCNO 1  
 Date\_ 20110314  
 Time\_ 15.41  
 INSTRUM spect  
 PROBD 5 mm PABBO BB-  
 PULPROG zgpg30  
 TD 65536  
 SOLVENT CDCl3  
 NS 1024  
 DS 4  
 SWH 24038.461 Hz  
 FIDRES 0.366798 Hz  
 AQ 1.3631988 sec  
 RG 2050  
 DW 20.800 usec  
 DE 6.50 usec  
 TE 293.6 K  
 D1 2.00000000 sec  
 D11 0.03000000 sec  
 TD0 1

==== CHANNEL f1 =====  
 NUC1 13C  
 P1 8.50 usec  
 PL1 -1.50 dB  
 PL1W 52.51238251 W  
 SF01 100.6228298 MHz

==== CHANNEL f2 =====  
 CPDPRG2 waitz16  
 NUC2 1H  
 PCPD2 90.00 usec  
 PL2 -1.80 dB  
 PL12 17.28 dB  
 PL2W 21.67079544 W  
 PL12W 0.26783961 W  
 SFO2 400.1316005 MHz  
 SI 32768  
 SF 100.6127736 MHz  
 WDW EM  
 SSB 0  
 LB 1.00 Hz  
 GB 0  
 PC 1.40

77.31  
77.20  
77.00  
76.68  
67.96

135.61  
135.51  
135.41  
134.89  
128.76  
128.47  
113.60  
113.57  
113.41  
113.35  
113.32  
113.24

165.65  
163.43  
163.40  
162.14  
162.08  
159.55  
159.50

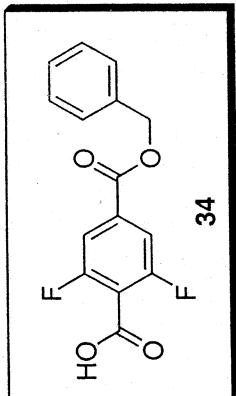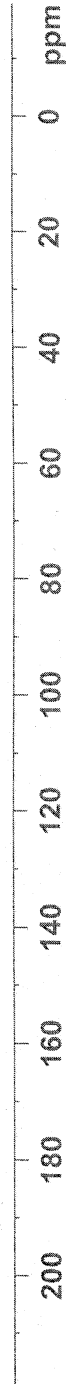

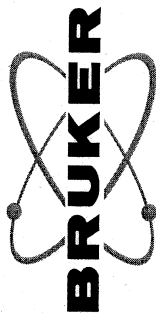

NAME CWII-097  
 EXPNO 2  
 PROCNO 1  
 Date\_ 20090507  
 Time\_ 14.46  
 INSTRUM spect  
 PROBHD 5 mm PABBO BB-  
 PULPROG zg30  
 TD 65536  
 SOLVENT CDC13  
 NS 16  
 DS 2  
 SWH 8223.685 Hz  
 FIDRES 0.125483 Hz  
 AQ 3.9846387 sec  
 RG 4  
 DW 60.800 usec  
 DE 6.50 usec  
 TE 295.6 K  
 D1 1.00000000 sec  
 TD0 1

===== CHANNEL f1 =====  
 NUC1 1H  
 P1 10.00 usec  
 PL1 -1.80 dB  
 PL1W 21.67079544 W  
 SF01 400.1324710 MHz  
 SI 32768  
 SF 400.1300106 MHz  
 WDW EM  
 SSB 0  
 LB 0.30 Hz  
 GB 0  
 PC 1.00

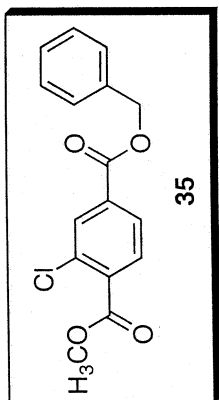

CWII-097H

8.132  
 8.128  
 7.996  
 7.992  
 7.976  
 7.971  
 7.860  
 7.840  
 7.456  
 7.440  
 7.436  
 7.429  
 7.424  
 7.408  
 7.403  
 7.388  
 7.383  
 7.366  
 7.260  
 5.379

3.954

ppm

3.00

1.93

4.58

0.97

0.98

0.92

CWII-097C

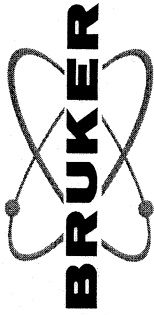

NAME CWII-097  
 EXPNO 3  
 PROCNO 1  
 Date 20090507  
 Time 14.53  
 INSTRUM spect  
 PROBHD 5 mm PABBO BB-  
 PULPROG zgig30  
 TD 65536  
 SOLVENT CDCl3  
 NS 129  
 DS 4  
 SWH 24038.461 Hz  
 FIDRES 0.366798 Hz  
 AQ 1.3631988 sec  
 RG 2050  
 DW 20.800 usec  
 DE 6.50 usec  
 TE 295.9 K  
 D1 2.00000000 sec  
 D11 0.03000000 sec  
 TDO 1

===== CHANNEL f1 =====  
 NUC1 13C  
 P1 8.50 usec  
 PL1 -1.50 dB  
 PLLW 52.51238251 W  
 SFO1 100.6228298 MHz

===== CHANNEL f2 =====  
 CPDPRG2 waltz16  
 NUC2 1H  
 PCPD2 90.00 usec  
 PL2 -1.80 dB  
 PL12 17.28 dB  
 PL2W 21.67079544 W  
 PL12W 0.26783961 W  
 SFO2 400.1316005 MHz  
 SI 32768  
 SF 100.6127729 MHz  
 WDW EM  
 SSB 0  
 LB 1.00 Hz  
 GB 0  
 PC 1.40

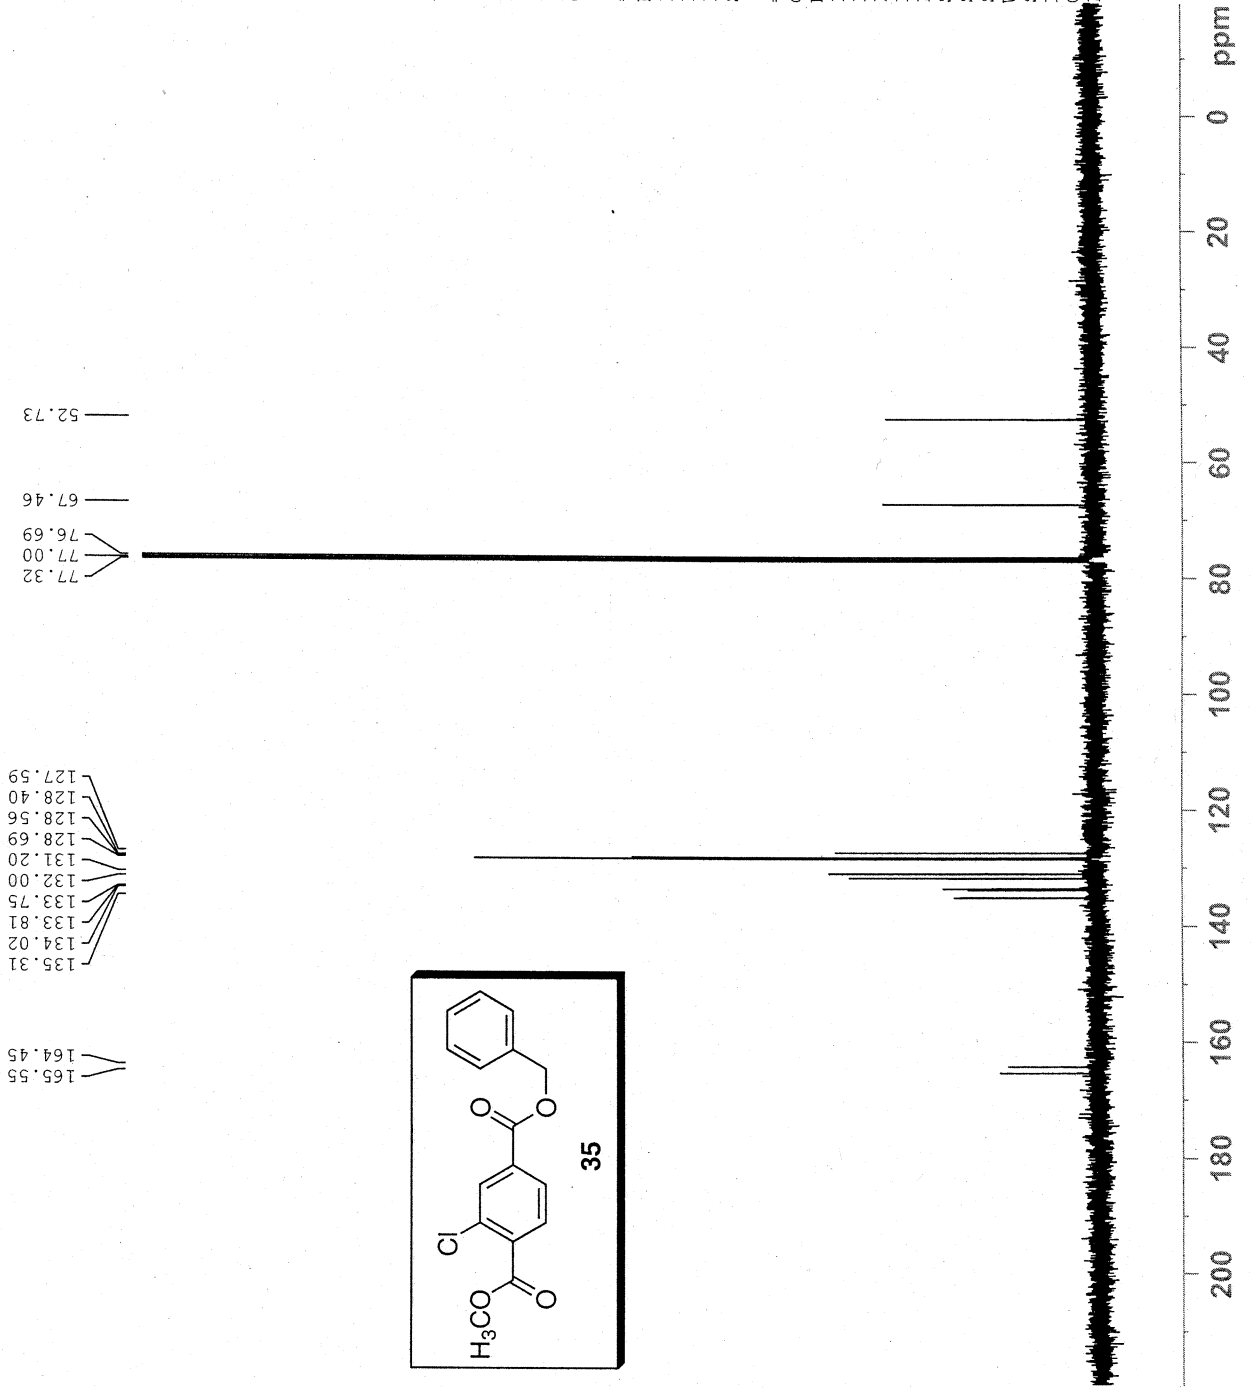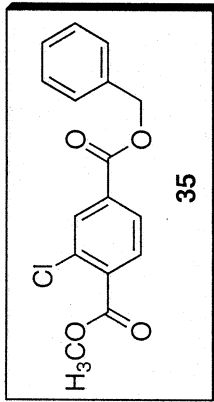

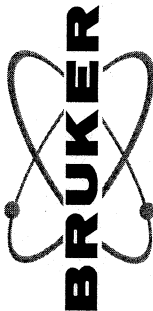

NAME CWII-117  
 EXPNO 2  
 PROCNO 1  
 Date 20090327  
 Time\_ 19.22  
 INSTRUM spect  
 PROBHD 5 mm PABBO BB-  
 PULPROG zg30  
 TD 65536  
 SOLVENT CDCl3  
 NS 16  
 DS 2  
 SWH 8223.685 Hz  
 FIDRES 0.125483 Hz  
 AQ 3.9846387 sec  
 RG 4  
 DW 60.800 usec  
 DE 6.50 usec  
 TE 298.0 K  
 D1 1.00000000 sec  
 TD0 1

===== CHANNEL f1 =====  
 NUC1 1H  
 P1 10.00 usec  
 PL1 -1.80 dB  
 PL1W 21.67079544 W  
 SF01 400.1324710 MHz  
 SI 32768  
 SF 400.1300106 MHz  
 WDW EM  
 SSB 0  
 LB 0.30 Hz  
 GB 0  
 PC 1.00

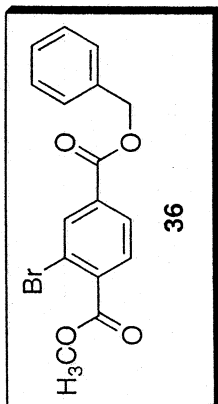

CWII-117H

8.044  
 8.040  
 8.024  
 8.020  
 7.812  
 7.792  
 7.459  
 7.455  
 7.436  
 7.428  
 7.424  
 7.408  
 7.388  
 7.383  
 7.379  
 7.366  
 7.260  
 5.378

3.954

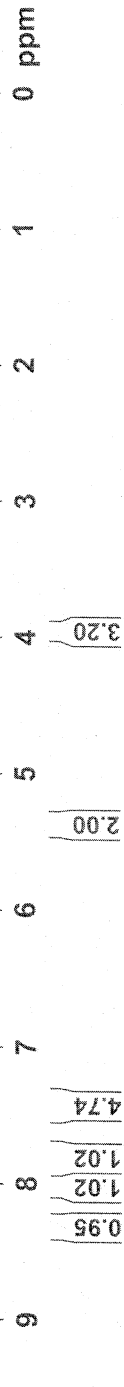

CWII-117C

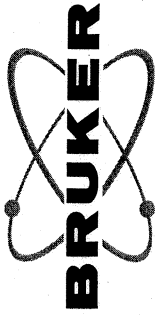

NAME CWII-117  
 EXPNO 3  
 PROCNO 1  
 Date 20090327  
 Time 19.30  
 INSTRUM spect  
 PROBHD 5 mm PABBO BB-  
 PULPROG zgig30  
 TD 65536  
 SOLVENT CDCl3  
 NS 64  
 DS 4  
 SWH 24038.461 Hz  
 FIDRES 0.366798 Hz  
 AQ 1.3631988 sec  
 RG 2050  
 DW 20.800 usec  
 DE 6.50 usec  
 TE 298.2 K  
 D1 2.00000000 sec  
 D11 0.03000000 sec  
 TD0 1

===== CHANNEL f1 =====  
 NUC1 13C  
 P1 8.50 usec  
 PL1 -1.50 dB  
 PLLW 52.51238251 W  
 SFO1 100.6228298 MHz

===== CHANNEL f2 =====  
 CPDPRG2 waltz16  
 NUC2 1H  
 PCPD2 90.00 usec  
 PL2 -1.80 dB  
 PL12 17.28 dB  
 PL2W 21.67079544 W  
 PL12W 0.26783961 W  
 SFO2 400.1316005 MHz  
 SI 32768  
 SF 100.6127722 MHz  
 WDW EM  
 SSB 0  
 LB 1.00 Hz  
 GB 0  
 PC 1.40

52.74  
 67.47  
 76.69  
 77.00  
 77.32

121.44  
 128.20  
 128.41  
 128.56  
 128.70  
 130.99  
 133.70  
 135.21  
 135.33  
 136.21

164.33  
 166.09

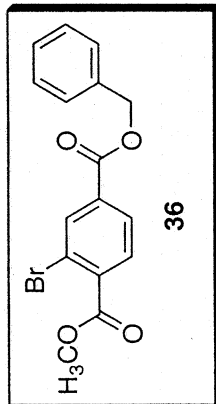

0 ppm  
20  
40  
60  
80  
100  
120  
140  
160  
180  
200

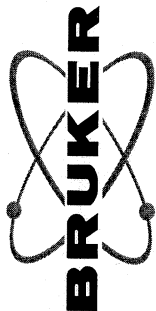

NAME CWIII-075  
EXPNO 1  
PROCNO 1  
Date 20091206  
Time 16.11  
INSTRUM spect  
PROBHD 5 mm PABBO BB-  
PULPROG zg30  
TD 65536  
SOLVENT CDC13  
NS 16  
DS 2  
SWH 8223.685 Hz  
FIDRES 0.125483 Hz  
AQ 3.9846387 sec  
RG 4  
DW 60.800 usec  
DE 6.50 usec  
TE 293.3 K  
D1 1.00000000 sec  
TD0 1

==== CHANNEL f1 =====  
NUC1 1H  
P1 10.00 usec  
PL1 -1.80 dB  
PL1W 21.67079544 W  
SF01 400.1324710 MHz  
SI 32768  
SF 400.1300109 MHz  
WDW EM  
SSB 0  
LB 0.30 Hz  
GB 0  
PC 1.00

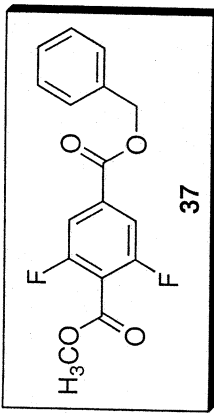

CWIII-077

7.446  
7.432  
7.426  
7.415  
7.410  
7.404  
7.396  
7.394  
7.392  
7.389  
7.384  
7.382  
7.372  
7.260  
5.375  
3.971

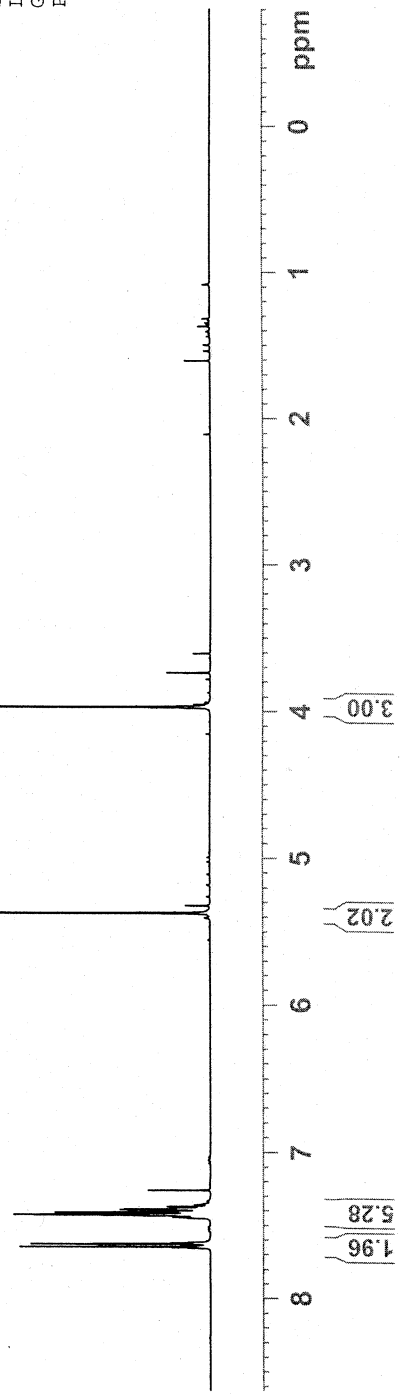



CWIII-077

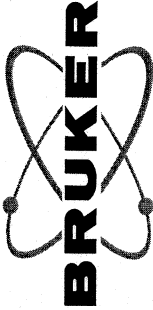

NAME CWIII-075  
 EXPNO 2  
 PROCNO 1  
 Date\_ 20091206  
 Time\_ 16.19  
 INSTRUM spect  
 PROBHD 5 mm PABBO BB-  
 PULPROG zgig30  
 TD 65536  
 SOLVENT CDCl3  
 NS 1024  
 DS 4  
 SWH 24038.461 Hz  
 FIDRES 0.366798 Hz  
 AQ 1.3631988 sec  
 RG 2050  
 DW 20.800 usec  
 DE 6.50 usec  
 TE 293.5 K  
 D1 2.00000000 sec  
 D11 0.03000000 sec  
 TDO 1

===== CHANNEL f1 =====  
 NUC1 13C  
 P1 8.50 usec  
 PL1 -1.50 dB  
 PL1W 52.51238251 W  
 SFO1 100.6228298 MHz

===== CHANNEL f2 =====  
 CPDPRG2 waltz16  
 NUC2 1H  
 PCPD2 90.00 usec  
 PL2 -1.80 dB  
 PL12 17.28 dB  
 PL2W 21.67079544 W  
 PL12W 0.26783961 W  
 SFO2 400.1316005 MHz  
 SI 32768  
 SF 100.6127744 MHz  
 WDW EM  
 SSB 0  
 LB 1.00 Hz  
 GB 0  
 PC 1.40

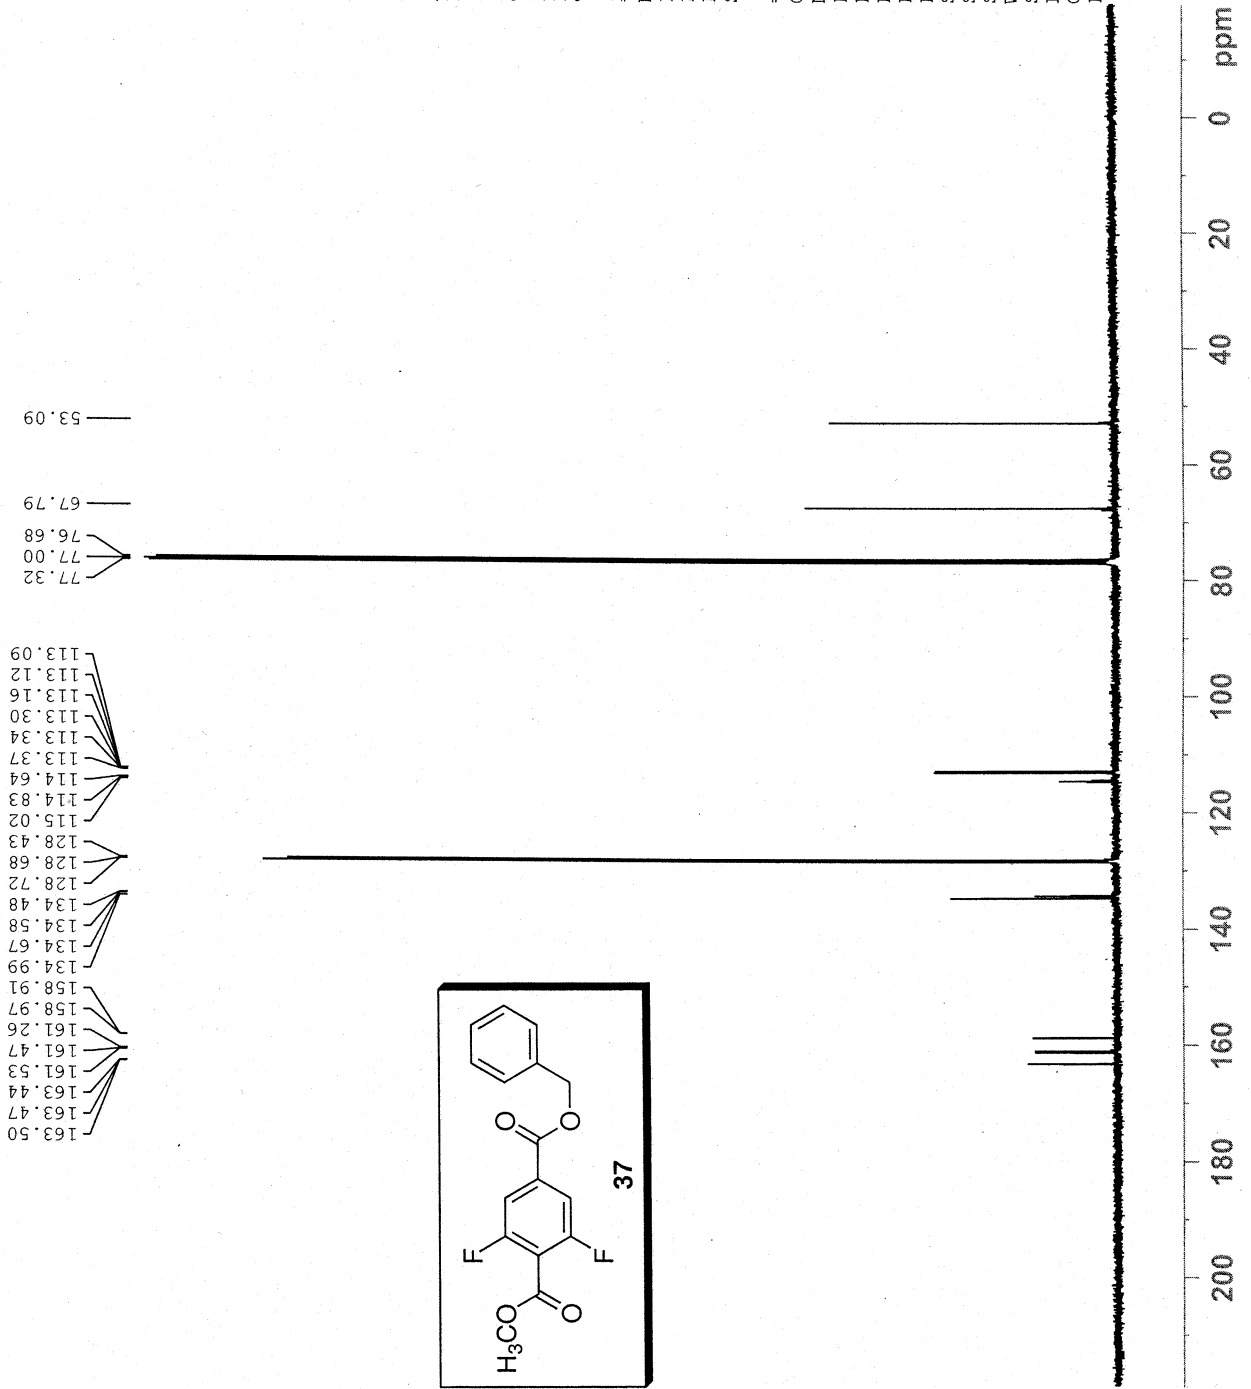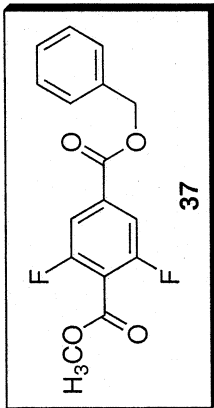

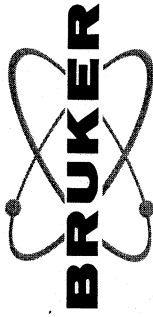

NAME CWII-099  
 EXPNO 2  
 PROCNO 1  
 Date\_ 20090423  
 Time\_ 14.24  
 INSTRUM spect  
 PROBHD 5 mm PABBO BB-  
 PULPROG zg30  
 TD 65536  
 SOLVENT DMSO  
 NS 16  
 DS 2  
 SWH 8223.685 Hz  
 FIDRES 0.125483 Hz  
 AQ 3.9846387 sec  
 RG 4  
 DW 60.800 usec  
 DE 6.50 usec  
 TE 296.3 K  
 D1 1.00000000 sec  
 TD0 1

===== CHANNEL f1 =====  
 NUC1 1H  
 P1 10.00 usec  
 PL1 -1.80 dB  
 PL1W 21.67079544 W  
 SFO1 400.1324710 MHz  
 SI 32768  
 SF 400.1300038 MHz  
 WDW EM  
 SSB 0  
 LB 0.30 Hz  
 GB 0  
 PC 1.00

CWII-099H

13.635

2.509  
 2.505  
 2.500  
 2.496  
 2.491

3.885

7.991  
 7.988  
 7.970  
 7.966  
 7.950  
 7.946  
 7.907  
 7.887

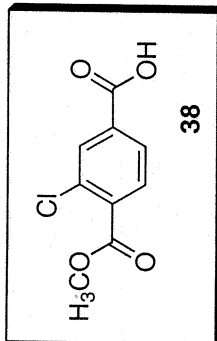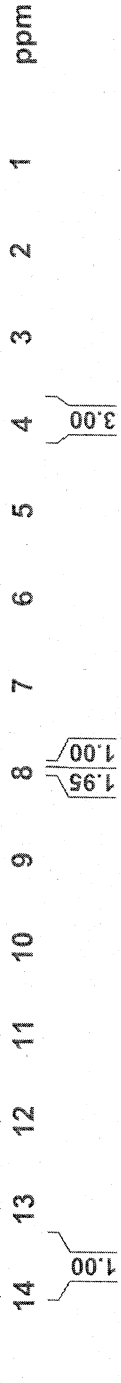

CWII-099C

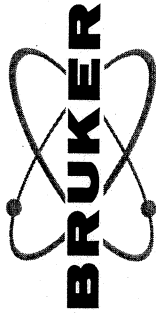

NAME CWII-099  
 EXNO 3  
 PROCNO 1  
 Date 20090423  
 Time 14.39  
 INSTRUM spect  
 PROBHD 5 mm PABBO BB-  
 PULPROG zgig30  
 TD 65536  
 SOLVENT DMSO  
 NS 128  
 DS 4  
 SMH 24038.461 Hz  
 FIDRES 0.366798 Hz  
 AQ 1.3631988 sec  
 RG 2050  
 DW 20.800 usec  
 DE 6.50 usec  
 TE 296.5 K  
 D1 2.00000000 sec  
 D11 0.03000000 sec  
 TDO 1

===== CHANNEL f1 =====  
 NUC1 13C  
 P1 8.50 usec  
 PL1 -1.50 dB  
 PL1W 52.51238251 W  
 SF01 100.6228298 MHz

===== CHANNEL f2 =====  
 CPDPRG2 waltz16  
 NUC2 1H  
 PCPD2 90.00 usec  
 PL2 -1.80 dB  
 PL12 17.28 dB  
 PL2W 21.67079544 W  
 PL12W 0.26783961 W  
 SF02 400.1316005 MHz  
 SI 32768  
 SF 100.6128135 MHz  
 WDW EM  
 SSB 0  
 LB 1.00 Hz  
 GB 0  
 PC 1.40

52.86  
 40.15  
 39.94  
 39.73  
 39.52  
 39.31  
 39.10  
 38.89

134.90  
 133.75  
 131.82  
 131.24  
 130.97  
 128.00

165.42  
 165.10

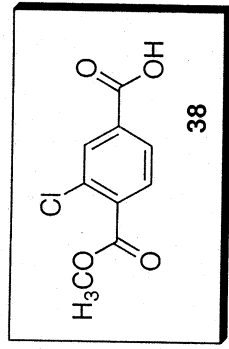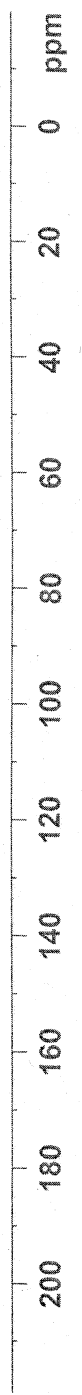

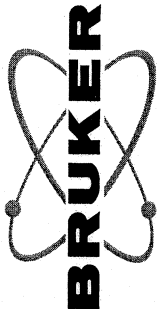

CWII-119

NAME CWII-119  
 EXPNO 2  
 PROCNO 1  
 Date\_ 20090426  
 Time\_ 14.08  
 INSTRUM spect  
 PROBHD 5 mm PABBO BB-  
 PULPROG zg30  
 TD 65536  
 SOLVENT DMSO  
 NS 16  
 DS 2  
 SMH 8223.685 Hz  
 FIDRES 0.125483 Hz  
 AQ 3.9846387 sec  
 RG 4  
 DW 60.800 usec  
 DE 6.50 usec  
 TE 297.0 K  
 DI 1.00000000 sec  
 TDO 1

===== CHANNEL f1 =====  
 NUC1 1H  
 P1 10.00 usec  
 PL1 -1.80 dB  
 PL1W 21.67079544 W  
 SFO1 400.1324710 MHz  
 SI 32768  
 SF 400.1300039 MHz  
 WDW EM  
 SSB 0  
 LB 0.30 Hz  
 GB 0  
 PC 1.00

3.885  
 2.509  
 2.505  
 2.500  
 2.496  
 2.491

8.163  
 8.159  
 8.054  
 8.012  
 8.008  
 7.992  
 7.988  
 7.862  
 7.842

13.594

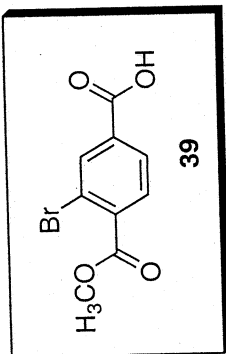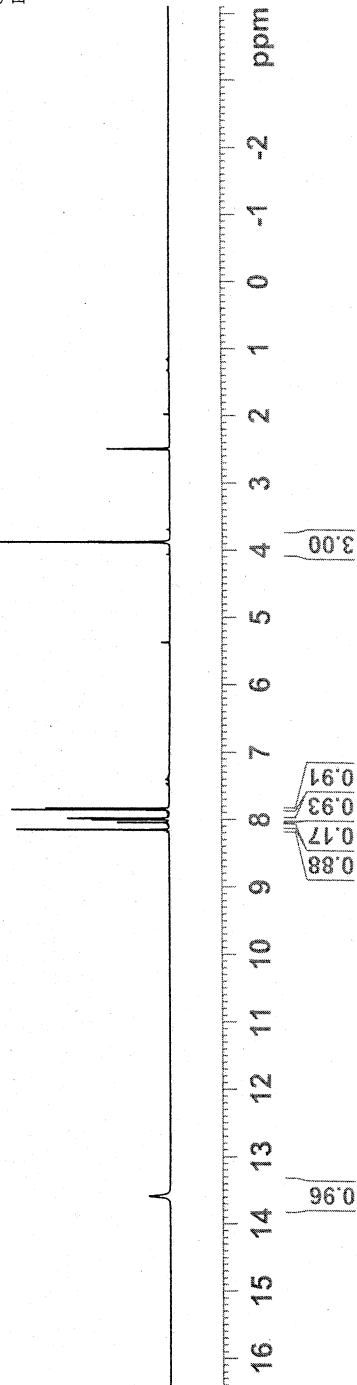

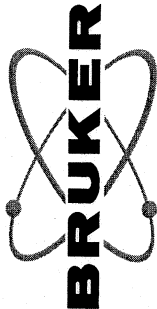

CWII-119C

52.86  
40.14  
39.93  
39.73  
39.52  
39.31  
39.10  
38.89

165.81  
165.31

136.12  
134.71  
134.05  
130.95  
128.47  
119.94

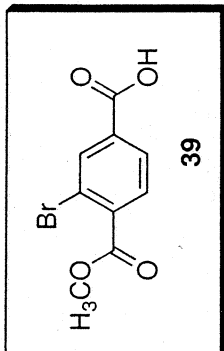

NAME CWII-119  
 EXPNO 3  
 PROCNO 1  
 Date 20090426  
 Time\_ 14.19  
 INSTRUM spect  
 PROBHD 5 mm PABBO BB-  
 PULPROG zgig30  
 TD 65536  
 SOLVENT DMSO  
 NS 145  
 DS 4  
 SWH 24038.461 Hz  
 FIDRES 0.366798 Hz  
 AQ 1.3631988 sec  
 RG 2050  
 DW 20.800 usec  
 DE 6.50 usec  
 TE 297.2 K  
 DI 2.00000000 sec  
 D11 0.03000000 sec  
 TD0 1

==== CHANNEL f1 =====  
 NUC1 13C  
 P1 8.50 usec  
 PL1 -1.50 dB  
 PL1W 52.51238251 W  
 SFO1 100.6228298 MHz

==== CHANNEL f2 =====  
 CPDPRG2 waltz16  
 NUC2 1H  
 PCPD2 90.00 usec  
 PL2 -1.80 dB  
 PL12 17.28 dB  
 PL2W 21.67079544 W  
 PL12W 0.26783961 W  
 SFO2 400.1316005 MHz  
 SI 32768  
 SF 100.6128157 MHz  
 WDW EM  
 SSB 0  
 LB 1.00 Hz  
 GB 0  
 PC 1.40

200 180 160 140 120 100 80 60 40 20 0 ppm

CWIII-079 H-NMR

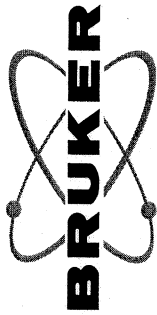

```

NAME CWIII-079
EXNO 1
PROCNO 1
Date 20100122
Time_ 17.30
INSTRUM spect
PROBHD 5 mm PABBO BB-
PULPROG zg30
TD 65536
SOLVENT CDCl3
NS 16
DS 2
SWH 8223.685 Hz
FIDRES 0.125483 Hz
AQ 3.9846387 sec
RG 4
DW 60.800 usec
DE 6.50 usec
TE 291.7 K
D1 1.00000000 sec
TDO 1

===== CHANNEL f1 =====
NUC1 1H
P1 10.00 usec
PL1 -1.80 dB
PL1W 21.67079544 W
SFO1 400.1324710 MHz
SI 32768
SF 400.1300114 MHz
EM
SSB 0
LB 0
GB 0
PC 1.00

```

4.026  
3.992

7.705  
7.700  
7.695  
7.676  
7.670  
7.665  
7.260

11.650

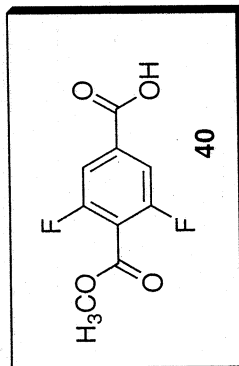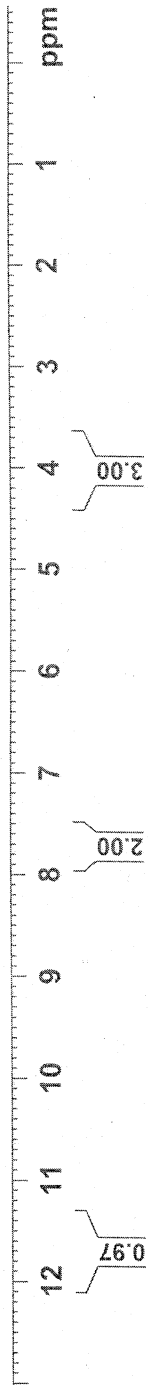

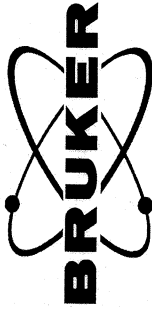

CWIII-079 13C-NMR

NAME CWIII-079  
EXPNO 2  
PROCNO 1  
Date\_ 20100122  
Time 17.36  
INSTRUM spect  
PROBHD 5 mm PABBO BB-  
PULPROG zgpg30  
TD 65536  
SOLVENT CDCl3  
NS 139  
DS 4  
SWH 24038.461 Hz  
FIDRES 0.366798 Hz  
AQ 1.3631988 sec  
RG 2050  
DW 20.800 usec  
DE 6.50 usec  
TE 291.5 K  
D1 2.00000000 sec  
D11 0.03000000 sec  
TD0 1

=====  
CHANNEL f1  
NUC1 13C  
P1 8.50 usec  
PL1 -1.50 dB  
PL1W 52.51238251 W  
SF01 100.6228298 MHz

=====  
CHANNEL f2  
CPDPRG2 waltz16  
NUC2 1H  
PCPD2 90.00 usec  
PL2 -1.80 dB  
PL12 17.28 dB  
PL2W 21.67079544 W  
PL12W 0.26783961 W  
SF02 400.1316005 MHz  
SI 32768  
SF 100.6127729 MHz  
WDW EM  
SSB 0  
LB 1.00 Hz  
GB 0  
PC 1.40

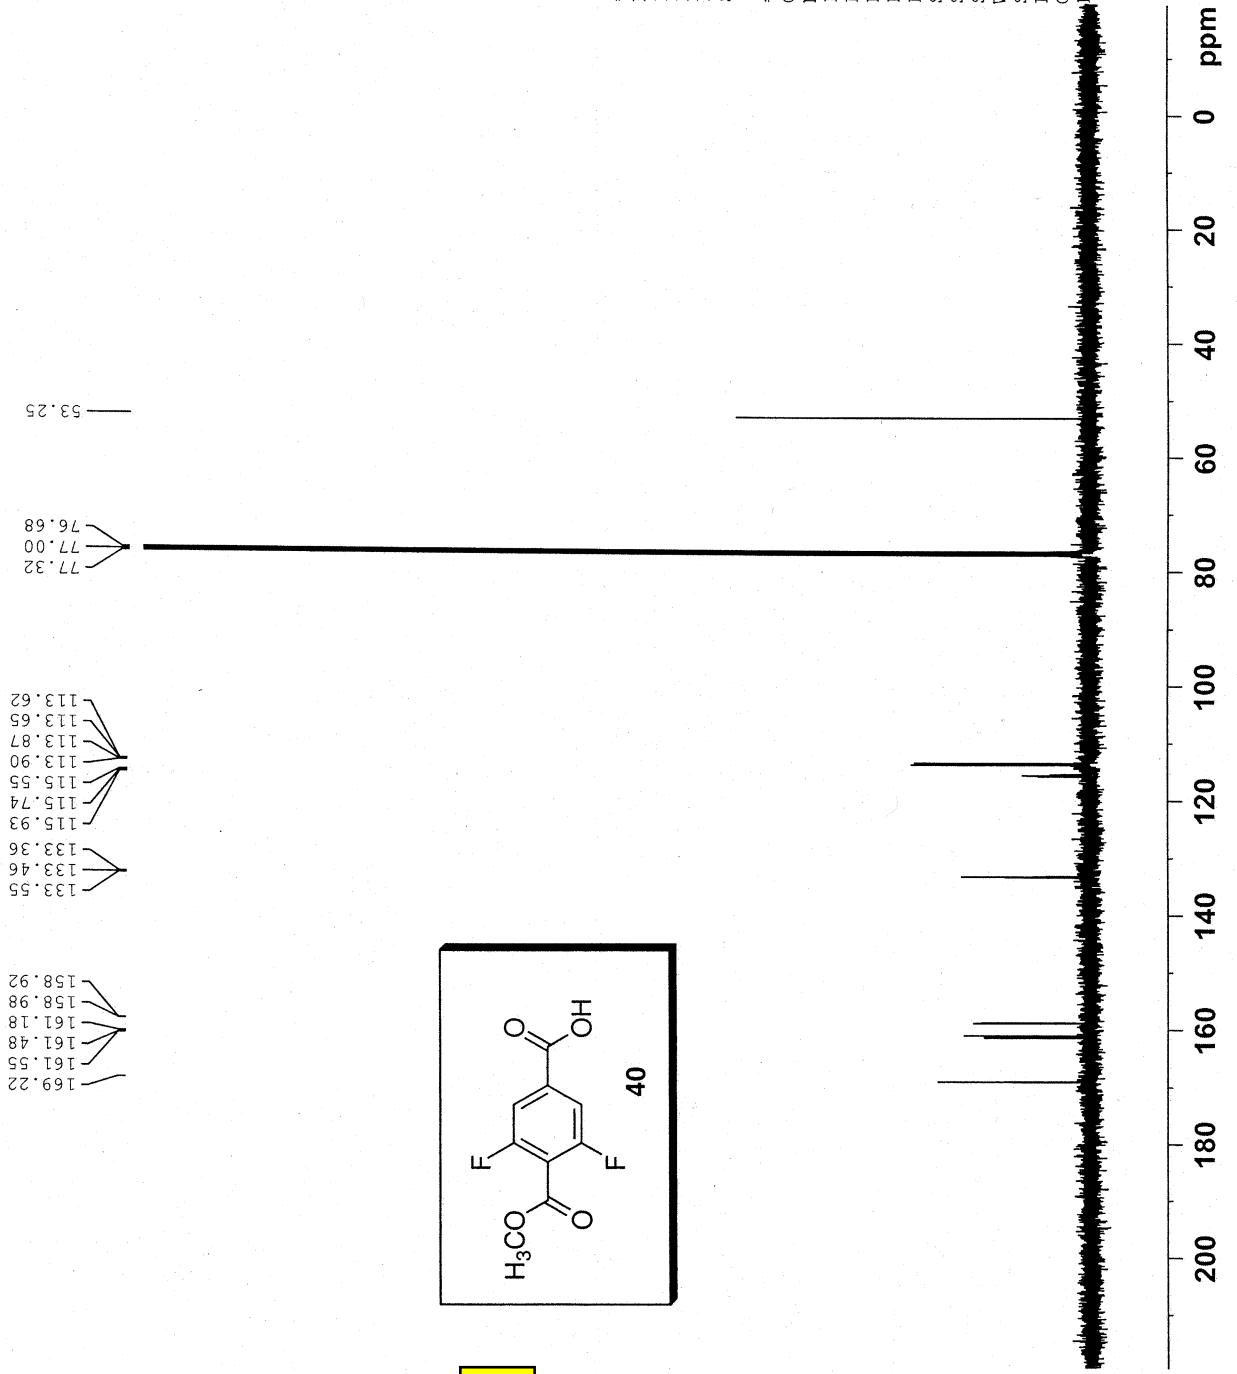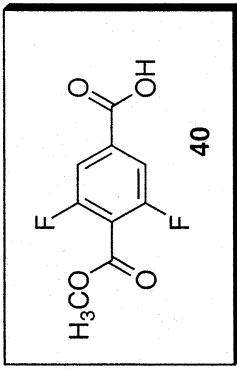

S47

CWII-077H

8.690  
8.686  
8.128  
8.124  
8.108  
8.104  
7.841  
7.821  
7.260

3.974

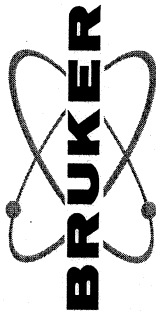

NAME CWII-077  
 EXPNO 2  
 PROCNO 1  
 Date 20090327  
 Time 14.56  
 INSTRUM spect  
 PROBHD 5 mm PABBO BB  
 PULPROG zg30  
 TD 65536  
 SOLVENT CDCl3  
 NS 16  
 DS 2  
 SWH 8223.685 Hz  
 FIDRES 0.125483 Hz  
 AQ 3.9846387 sec  
 RG 4  
 DW 60.800 usec  
 DE 6.50 usec  
 TE 297.5 K  
 D1 1.00000000 sec  
 TDO 1

==== CHANNEL f1 =====  
 NUC1 1H  
 P1 10.00 usec  
 PL1 -1.80 dB  
 PL1W 21.67079544 W  
 SF01 400.1324710 MHz  
 SI 32768  
 SF 400.1300106 MHz  
 WDW EM  
 SSB 0  
 LB 0.30 Hz  
 GB 0  
 PC 1.00

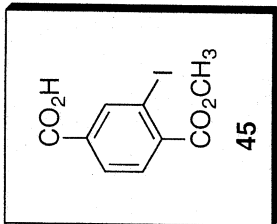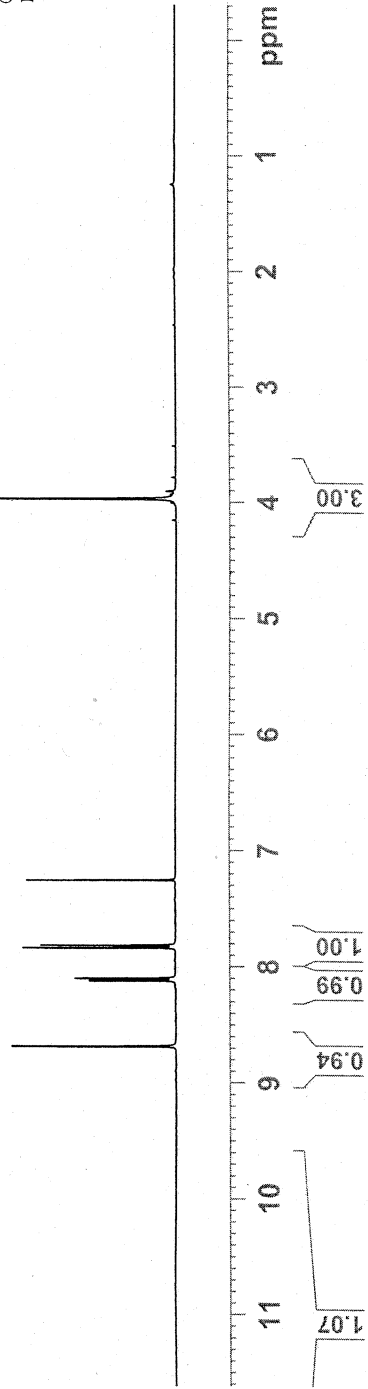



CWII-077

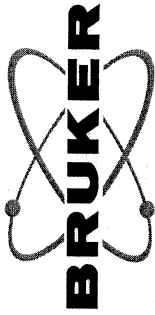

NAME CWII-077  
 EXPNO 3  
 PROCNO 1  
 Date 20090327  
 Time 14.50  
 INSTRUM spect  
 PROBHD 5 mm PABBO BB-  
 PULPROG zgig30  
 TD 65536  
 SOLVENT CDCl3  
 NS 64  
 DS 4  
 SWH 24038.461 Hz  
 FIDRES 0.366798 Hz  
 AQ 1.3631988 sec  
 RG 2050  
 DW 20.800 usec  
 DE 6.50 usec  
 TE 297.7 K  
 D1 2.00000000 sec  
 D11 0.03000000 sec  
 TD0 1

===== CHANNEL f1 =====  
 NUC1 13C  
 P1 8.50 usec  
 PL1 -1.50 dB  
 PL1W 52.51238251 W  
 SFO1 100.6228298 MHz

===== CHANNEL f2 =====  
 CPDPRG2 waltz16  
 NUC2 1H  
 PCPD2 90.00 usec  
 PL2 -1.80 dB  
 PL12 17.28 dB  
 PL2W 21.67079544 W  
 PL12W 0.26783961 W  
 SFO2 400.1316005 MHz  
 SI 32768  
 SF 100.6127714 MHz  
 WDW EM  
 SSB 0  
 LB 1.00 Hz  
 GB 0  
 PC 1.40

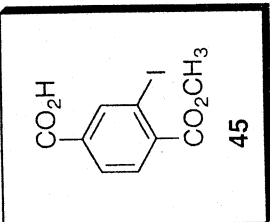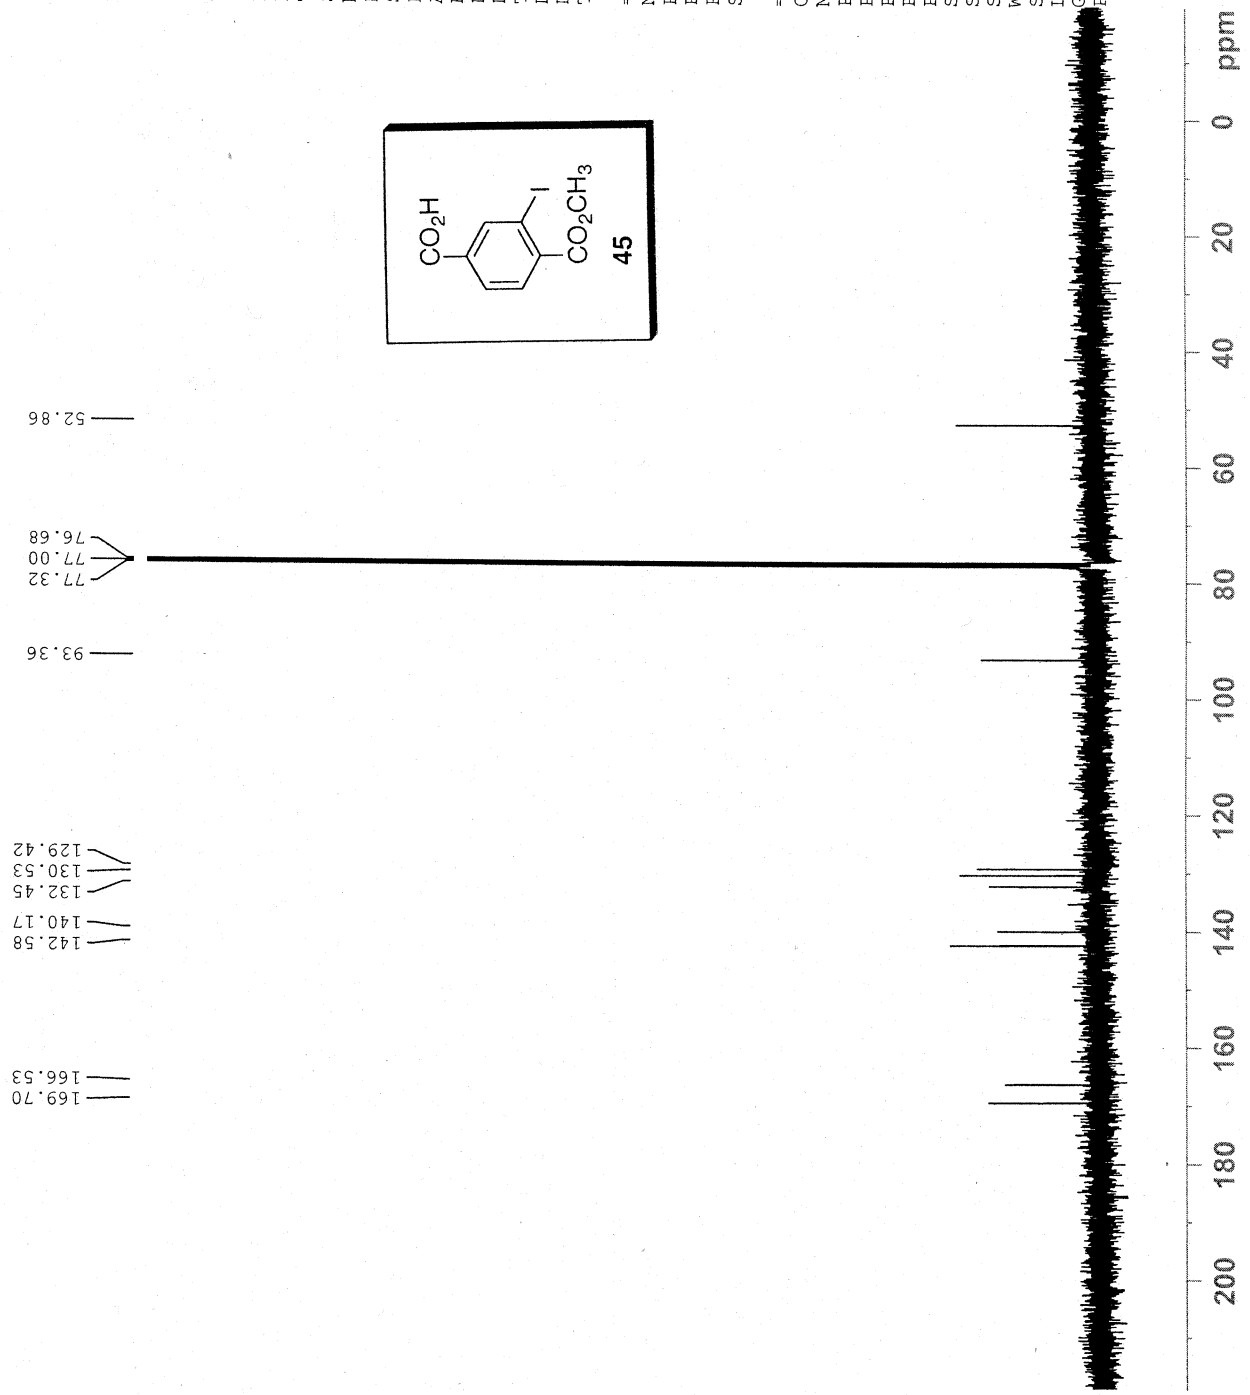

CWII-127

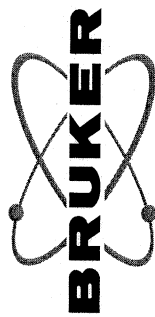

NAME CWII-127  
 EXPNO 1  
 PROCNO 1  
 Date\_ 20090702  
 Time\_ 14.18  
 INSTRUM spect  
 PROBHD 5 mm PABBO BB-  
 PULPROG zg30  
 TD 65536  
 SOLVENT CDCl3  
 NS 16  
 DS 2  
 SWH 8223.685 Hz  
 FIDRES 0.125483 Hz  
 AQ 3.9846387 sec  
 RG 4  
 DW 60.800 usec  
 DE 6.50 usec  
 TE 292.0 K  
 D1 1.00000000 sec  
 TDO 1  
 ===== CHANNEL f1 =====  
 NUC1 1H  
 P1 10.00 usec  
 PL1 -1.80 dB  
 PL1W 21.67079544 W  
 SFO1 400.1324710 MHz  
 SI 32768  
 SF 400.1300109 MHz  
 WDW EM  
 SSB 0  
 LB 0.30 Hz  
 GB 0  
 PC 1.00

7.888  
 7.880  
 7.875  
 7.868  
 7.718  
 7.714  
 7.698  
 7.694  
 7.260  
 7.251  
 7.218

3.969  
 2.353  
 1.692  
 1.312  
 1.206

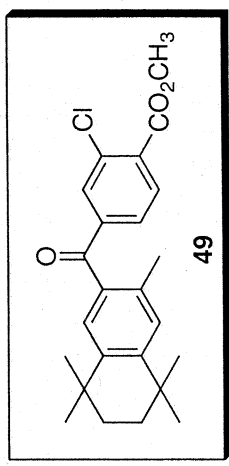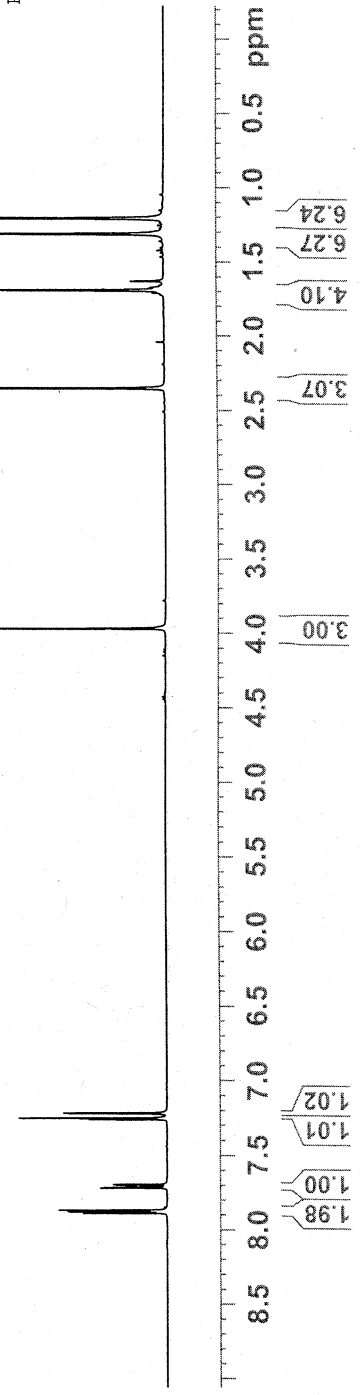

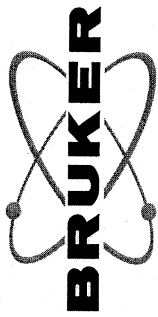

NAME CWII-127  
 EXPNO 2  
 PROCNO 1  
 Date 20090702  
 Time 14.41  
 INSTRUM spect  
 PROBHD 5 mm PABBO BB-  
 PULPROG zgig30  
 TD 65536  
 SOLVENT CDCl3  
 NS 313  
 DS 4  
 SWH 24038.461 Hz  
 FIDRES 0.366798 Hz  
 AQ 1.3631988 sec  
 RG 2050  
 DW 20.800 usec  
 DE 6.50 usec  
 TE 292.4 K  
 D1 2.00000000 sec  
 D11 0.03000000 sec  
 TD0 1

===== CHANNEL f1 =====  
 NUC1 13C  
 P1 8.50 usec  
 PL1 -1.50 dB  
 PL1W 52.51238251 W  
 SFO1 100.6228298 MHz  
 ===== CHANNEL f2 =====  
 CPDPRG2 waltz16  
 NUC2 1H  
 PCPD2 90.00 usec  
 PL2 -1.80 dB  
 PL12 17.28 dB  
 PL2W 21.67079544 W  
 PL12W 0.26783961 W  
 SFO2 400.1316005 MHz  
 SI 32768  
 SF 100.6127744 MHz  
 WDW EM  
 SSB 0  
 LB 1.00 Hz  
 GB 0  
 PC 1.40

CWII-127

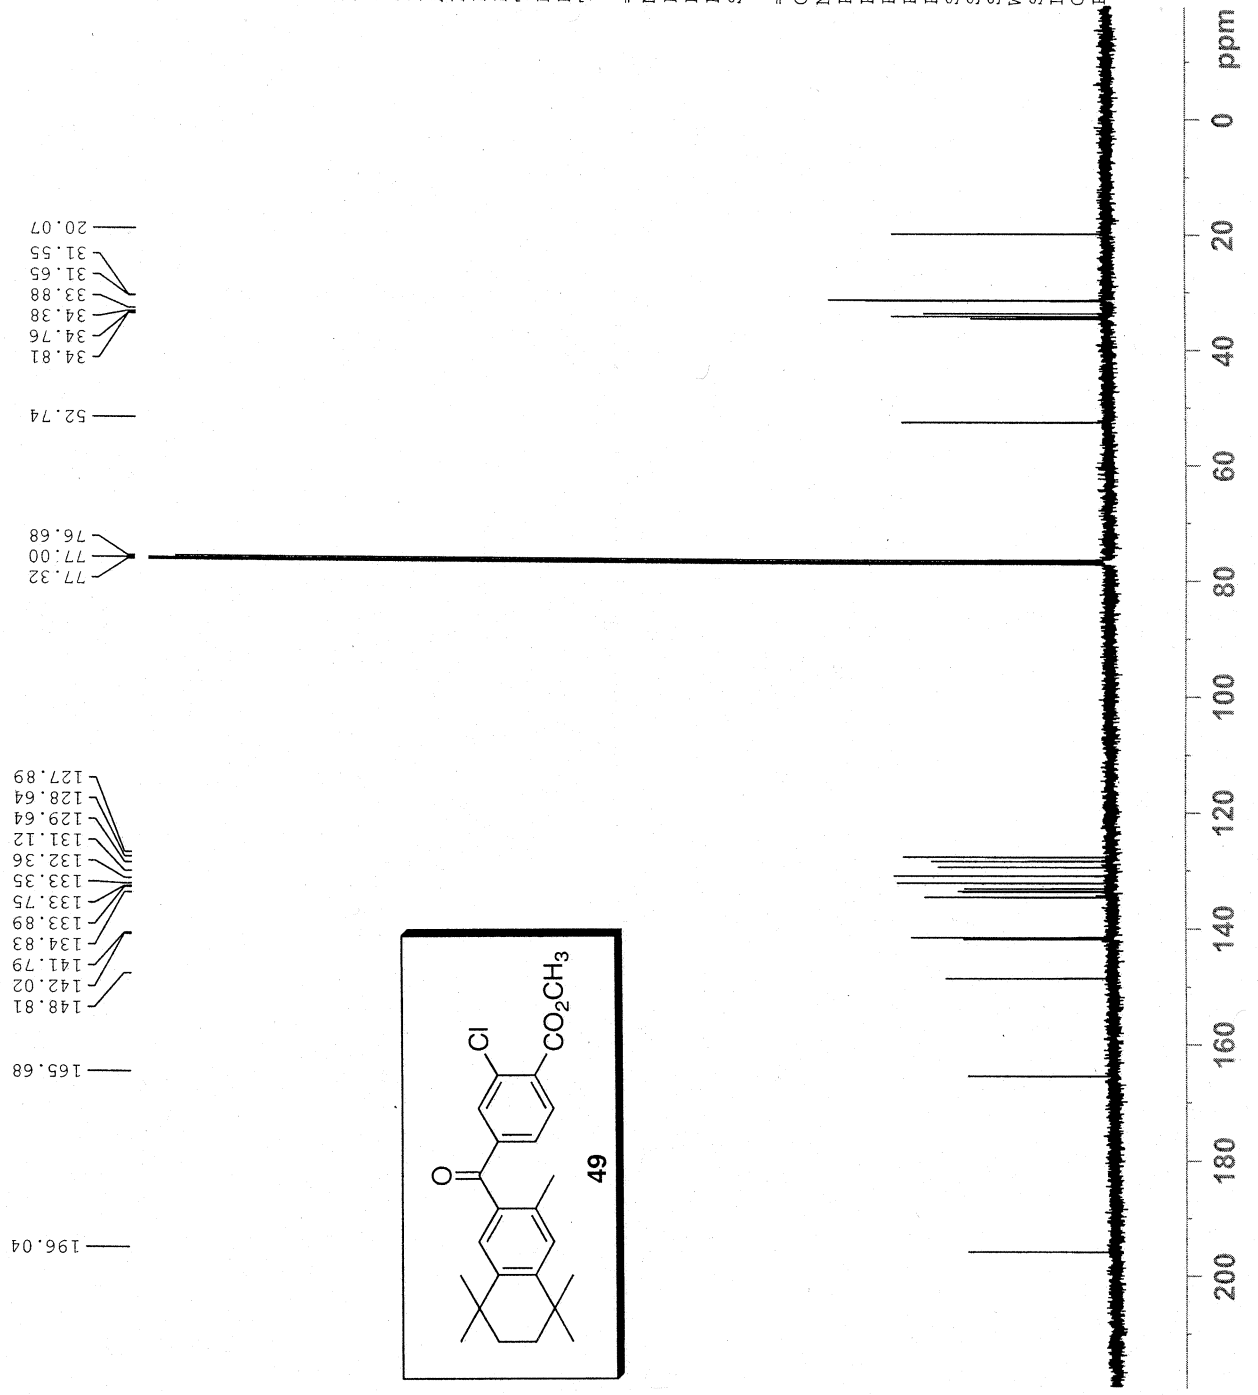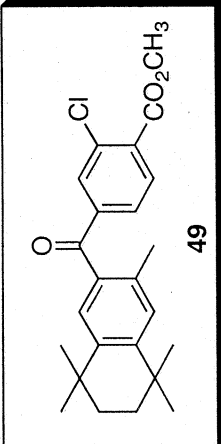

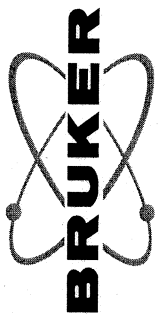

NAME CWII-135  
 EXPNO 1  
 PROCNO 1  
 Date 20090702  
 Time 16.51  
 INSTRUM spect  
 PROBHD 5 mm PABBO BB-  
 PULPROG zg30  
 TD 65536  
 SOLVENT CDCl3  
 NS 16  
 DS 2  
 SWH 8223.685 Hz  
 FIDRES 0.125483 Hz  
 AQ 3.9846387 sec  
 RG 4  
 DW 60.800 usec  
 DE 6.50 usec  
 TE 292.1 K  
 D1 1.00000000 sec  
 TD0 1  
 ===== CHANNEL f1 =====  
 NUC1 1H  
 P1 10.00 usec  
 PL1 -1.80 dB  
 PL1W 21.6707954 W  
 SFO1 400.1324710 MHz  
 SI 32768  
 SF 400.1300109 MHz  
 WDW EM  
 SSB 0  
 LB 0.30 Hz  
 GB 0  
 PC 1.00

CWII-135

8.083  
 8.079  
 7.844  
 7.824  
 7.770  
 7.766  
 7.750  
 7.746  
 7.260  
 7.253  
 7.220

3.970  
 2.359  
 1.692  
 1.313  
 1.209

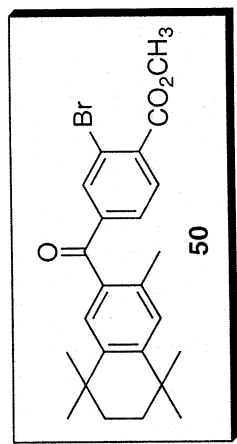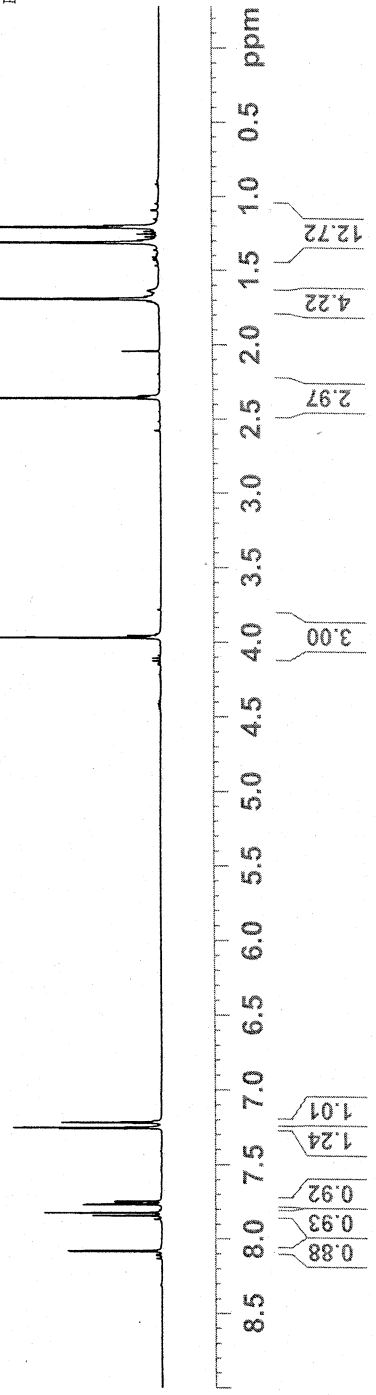

CWII-135

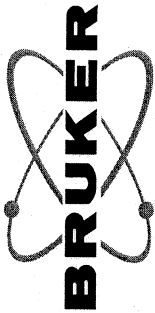

NAME CWII-135  
 EXPNO 2  
 PROCNO 1  
 Date 20090702  
 Time\_ 17.11  
 INSTRUM spect  
 PROBHD 5 mm PABBO BB-  
 PULPROG zgig30  
 TD 65536  
 SOLVENT CDC13  
 NS 273  
 DS 4  
 SWH 24038.461 Hz  
 FIDRES 0.366798 Hz  
 AQ 1.3631988 sec  
 RG 2050  
 DW 20.800 usec  
 DE 6.50 usec  
 TE 292.4 K  
 D1 2.0000000 sec  
 D11 0.0300000 sec  
 TDO 1

===== CHANNEL f1 =====  
 NUC1 13C  
 P1 8.50 usec  
 PL1 -1.50 dB  
 PL1W 52.51238251 W  
 SFO1 100.6228298 MHz

===== CHANNEL f2 =====  
 CPDPRG2 waltz16  
 NUC2 1H  
 PCPD2 90.00 usec  
 PL2 -1.80 dB  
 PL12 17.28 dB  
 PL2W 21.67079544 W  
 PL12W 0.26783961 W  
 SFO2 400.1316005 MHz  
 SI 32768  
 SF 100.6127744 MHz  
 WDW EM  
 SSB 0  
 LB 1.00 Hz  
 GB 0  
 PC 1.40

20.09  
 31.55  
 31.66  
 33.88  
 34.38  
 34.76  
 34.81  
 52.77  
 76.68  
 77.00  
 77.31

121.51  
 128.52  
 128.73  
 129.66  
 130.93  
 133.82  
 134.89  
 135.49  
 135.63  
 141.68  
 142.02  
 148.83

166.22

195.88

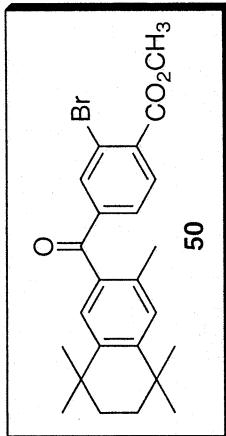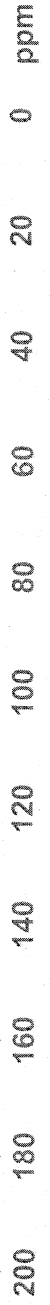

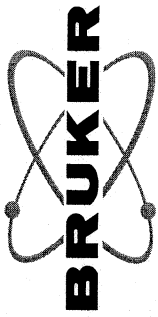

NAME CWII-139  
 EXPNO 1  
 PROCNO 1  
 Date 20090702  
 Time\_ 17.19  
 INSTRUM spect  
 PROBHD 5 mm FAPBO BB-  
 PULPROG zg30  
 TD 65536  
 SOLVENT CDCl3  
 NS 16  
 DS 2  
 SWH 8223.685 Hz  
 FIDRES 0.125483 Hz  
 AQ 3.9846387 sec  
 RG 4  
 DW 60.800 usec  
 DE 6.50 usec  
 TE 292.1 K  
 DI 1.00000000 sec  
 TD0 1

===== CHANNEL f1 =====  
 NUC1 1H  
 P1 10.00 usec  
 PL1 -1.80 dB  
 PL1W 21.67079544 W  
 SFO1 400.1324710 MHz  
 SI 32768  
 SF 400.1300109 MHz  
 WDW EM  
 SSB 0  
 LB 0.30 Hz  
 GB 0  
 PC 1.00

CWII-139

8.386  
 8.383  
 7.843  
 7.823  
 7.810  
 7.806  
 7.790  
 7.786  
 7.260  
 7.253  
 7.220

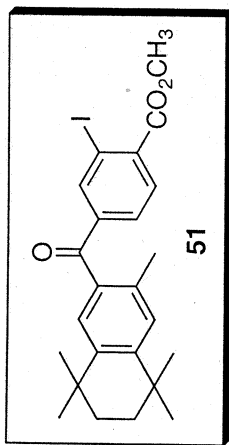

3.969  
 2.366  
 1.692  
 1.313  
 1.211

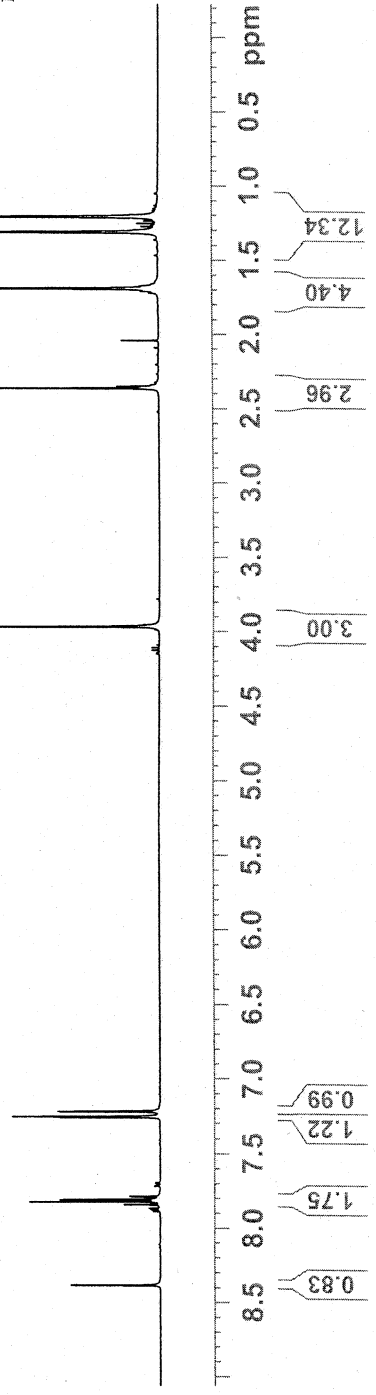

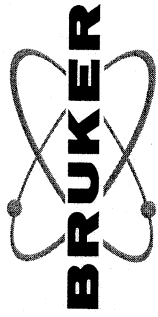

NAME CWII-139  
 EXPNO 2  
 PROCNO 1  
 Date 20090702  
 Time 17.32  
 INSTRUM spect  
 PROBHD 5 mm PABBO BB-  
 PULPROG zgig30  
 TD 65536  
 SOLVENT CDCl3  
 NS 257  
 DS 4  
 SWH 24038.461 Hz  
 FIDRES 0.366798 Hz  
 AQ 1.3631988 sec  
 RG 2050  
 DW 20.800 usec  
 DE 6.50 usec  
 TE 292.3 K  
 D1 2.00000000 sec  
 D11 0.03000000 sec  
 TD0 1

===== CHANNEL f1 =====  
 NUC1 13C  
 P1 8.50 usec  
 PL1 -1.50 dB  
 PLW 52.51238251 W  
 SFO1 100.6228298 MHz

===== CHANNEL f2 =====  
 CPDPRG2 waltz16  
 NUC2 1H  
 PCPD2 90.00 usec  
 PL2 -1.80 dB  
 PL12 17.28 dB  
 PL2W 21.67079544 W  
 PL12W 0.26783961 W  
 SFO2 400.1316005 MHz  
 SI 32768  
 SF 100.6127744 MHz  
 WDW EM  
 SSB 0  
 LB 1.00 Hz  
 GB 0  
 PC 1.40

CWII-139

195.72  
 166.65  
 148.84  
 142.55  
 141.99  
 141.49  
 138.51  
 135.00  
 133.75  
 130.48  
 129.68  
 129.33  
 128.88  
 93.54  
 77.32  
 77.00  
 76.68  
 52.78  
 34.81  
 34.76  
 34.39  
 33.88  
 31.68  
 31.55  
 20.12

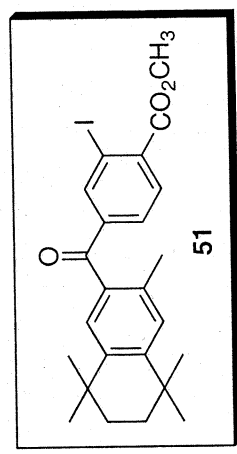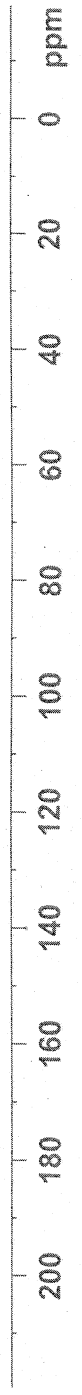

CWIII-083 H-NMR

7.389  
7.369  
7.260  
7.239  
7.220  
7.213

3.989  
3.983  
3.606

2.463  
2.340  
1.695  
1.670  
1.665  
1.601  
1.310  
1.288  
1.282  
1.217  
1.160

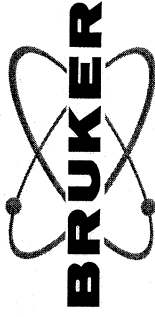

NAME CWIII-083  
 EXPNO 1  
 PROCNO 1  
 Date 20100122  
 Time 17.02  
 INSTRUM spect  
 PROBHD 5 mm PABBO BB-  
 PULPROG zg30  
 TD 65536  
 SOLVENT CDCl3  
 NS 16  
 DS 2  
 SWH 8223.685 Hz  
 FIDRES 0.125483 Hz  
 AQ 3.9846387 sec  
 RG 4  
 DW 60.800 usec  
 DE 6.50 usec  
 TE 291.5 K  
 D1 1.00000000 sec  
 TD0 1

===== CHANNEL f1 =====  
 NUC1 1H  
 P1 10.00 usec  
 PL1 -1.80 dB  
 PL1W 21.67079544 W  
 SF01 400.1324710 MHz  
 SI 32768  
 SF 400.1300114 MHz  
 WDW EM  
 SSB 0  
 LB 0.30 Hz  
 GB 0  
 PC 1.00

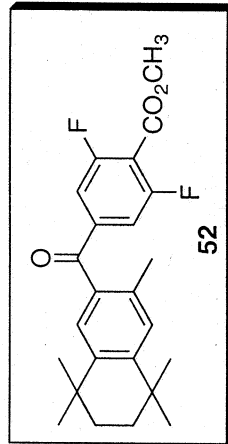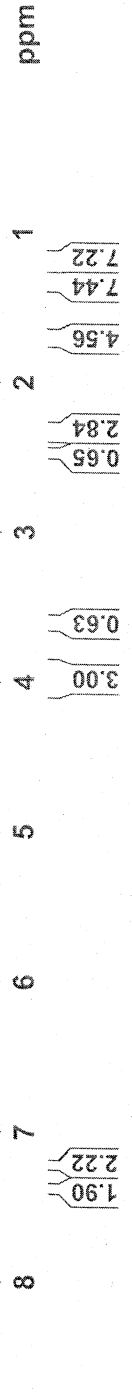



CWIII-083 13C-NMR

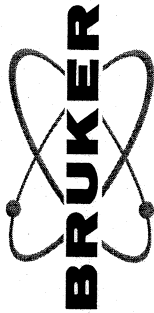

NAME CWIII-083  
 EXPNO 2  
 PROCNO 1  
 Date 20100122  
 Time 17.13  
 INSTRUM spect  
 PROBHD 5 mm PABBO BB-  
 PULPROG zgig30  
 TD 65536  
 SOLVENT CDC13  
 NS 201  
 DS 4  
 SWH 24038.461 Hz  
 FIDRES 0.366798 Hz  
 AQ 1.3631988 sec  
 RG 2050  
 DW 20.800 usec  
 DE 6.50 usec  
 TE 291.4 K  
 D1 2.0000000 sec  
 D11 0.0300000 sec  
 TDO 1

===== CHANNEL f1 =====  
 NUC1 13C  
 P1 8.50 usec  
 PL1 -1.50 dB  
 PLLW 52.51238251 W  
 SFO1 100.6228298 MHz

===== CHANNEL f2 =====  
 CPDPRG2 waltz16  
 NUC2 1H  
 PCPD2 90.00 usec  
 PL2 -1.80 dB  
 PL12 17.28 dB  
 PL2W 21.67079544 W  
 PL12W 0.26783961 W  
 SFO2 400.1316005 MHz  
 SI 32768  
 SF 100.6127736 MHz  
 WDM EM  
 SSB 0  
 LB 1.00 Hz  
 GB 0  
 PC 1.40

194.70  
 161.55  
 161.46  
 158.98  
 158.92  
 149.09  
 142.58  
 142.50  
 142.17  
 136.13  
 134.78  
 133.37  
 133.13  
 129.91  
 129.74  
 128.33  
 114.18  
 113.55  
 113.28  
 77.32  
 77.00  
 76.68  
 53.11  
 52.65  
 34.78  
 34.73  
 34.41  
 33.90  
 33.81  
 31.67  
 31.55  
 20.69  
 20.00

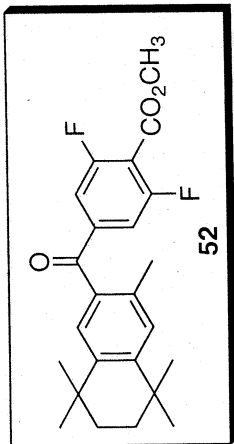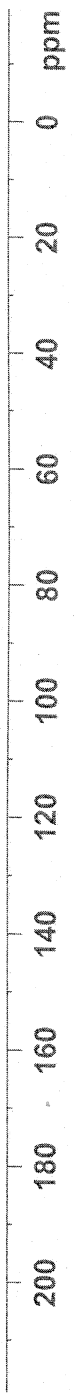

CWII-141

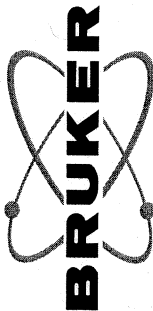

NAME CWII-141  
 EXPNO 1  
 PROCNO 1  
 Date 20090702  
 Time 16.22  
 INSTRUM spect  
 PROBHD 5 mm PABEO BB-  
 PULPROG zg30  
 TD 65536  
 SOLVENT CDCl3  
 NS 16  
 DS 2  
 SWH 8223.685 Hz  
 FIDRES 0.125483 Hz  
 AQ 3.9846387 sec  
 RG 4  
 DW 60.800 usec  
 DE 6.50 usec  
 TE 292.0 K  
 D1 1.00000000 sec  
 TDO 1

===== CHANNEL f1 =====  
 NUC1 1H  
 P1 10.00 usec  
 PL1 -1.80 dB  
 PL1W 21.67079544 W  
 SFO1 400.1324710 MHz  
 SI 32768  
 SF 400.1300109 MHz  
 WDW EM  
 SSB 0  
 LB 0.30 Hz  
 GB 0  
 PC 1.00

7.784  
 7.763  
 7.7394  
 7.389  
 7.394  
 7.389  
 7.260  
 7.199  
 7.199  
 7.195  
 7.179  
 7.175  
 7.104  
 7.086  
 5.801  
 5.798  
 5.351  
 5.348  
 3.924  
 1.953  
 1.701  
 1.308  
 1.277

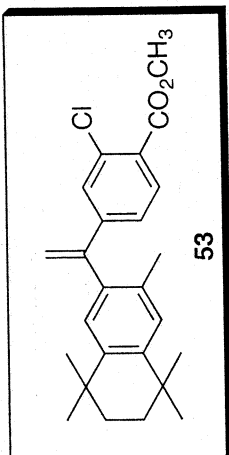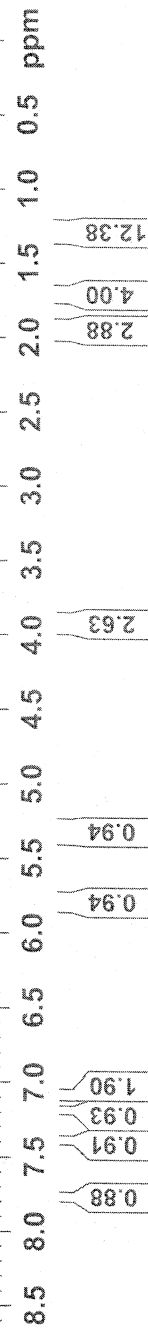

CWII-141

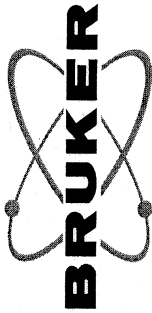

NAME CWII-141  
 EXPNO 2  
 PROCNO 1  
 Date 20090702  
 Time 16.35  
 INSTRUM spect  
 PROBHD 5 mm PABBO BB-  
 PULPROG zgig30  
 TD 65536  
 SOLVENT CDCl3  
 NS 257  
 DS 4  
 SWH 24038.461 Hz  
 FIDRES 0.366798 Hz  
 AQ 1.3631988 sec  
 RG 2050  
 DW 20.800 usec  
 DE 6.50 usec  
 TE 292.3 K  
 D1 2.00000000 sec  
 D11 0.03000000 sec  
 TD0 1

===== CHANNEL f1 =====  
 NUC1 13C  
 P1 8.50 usec  
 PL1 -1.50 dB  
 PL1W 52.51238251 W  
 SF01 100.6228298 MHz

===== CHANNEL f2 =====  
 CPDPRG2 waltzi6  
 NUC2 1H  
 PCPD2 90.00 usec  
 PL2 -1.80 dB  
 PL12 17.28 dB  
 PL2W 21.67079544 W  
 PL12W 0.26783961 W  
 SF02 400.1316005 MHz  
 SI 32768  
 SF 100.6127744 MHz  
 WDW EM  
 SSB 0  
 LB 1.00 Hz  
 GB 0  
 PC 1.40

165.95  
 147.92  
 145.76  
 144.61  
 142.43  
 137.21  
 133.91  
 132.60  
 131.52  
 128.95  
 128.23  
 128.16  
 128.03  
 124.82  
 117.78  
 76.68  
 77.32  
 77.00  
 77.00  
 52.36  
 35.11  
 35.09  
 33.99  
 33.87  
 31.89  
 31.83  
 19.97

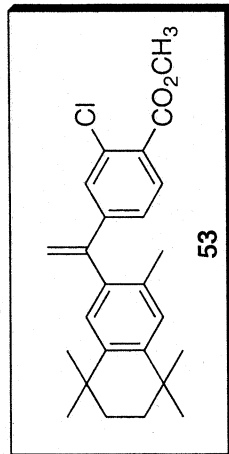

200 180 160 140 120 100 80 60 40 20 0 ppm

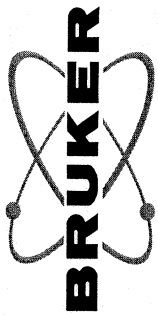

NAME CWII-149  
 EXPNO 1  
 PROCNO 1  
 Date 20090907  
 Time 12.15  
 INSTRUM spect  
 PROBHD 5 mm PABBO BB-  
 PULPROG zg30  
 TD 65536  
 SOLVENT CDCl3  
 NS 16  
 DS 2  
 SWH 8223.685 Hz  
 FIDRES 0.125483 Hz  
 AQ 3.9846387 sec  
 RG 4  
 DW 60.800 usec  
 DE 6.50 usec  
 TE 291.7 K  
 DI 1.00000000 sec  
 TD0 1  
 ===== CHANNEL f1 =====  
 NUC1 1H  
 P1 10.00 usec  
 PL1 -1.80 dB  
 PL1W 21.67079544 W  
 SFO1 400.1324710 MHz  
 SI 32768  
 SF 400.1300111 MHz  
 WDW EM  
 SSB 0  
 LB 0.30 Hz  
 GB 0  
 PC 1.00

CWII-149

7.743  
 7.723  
 7.630  
 7.626  
 7.260  
 7.219  
 7.215  
 7.199  
 7.195  
 7.101  
 7.085  
 5.791  
 5.788  
 5.345  
 5.343  
 3.923  
 1.955  
 1.700  
 1.307  
 1.275

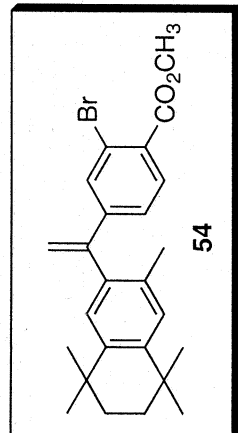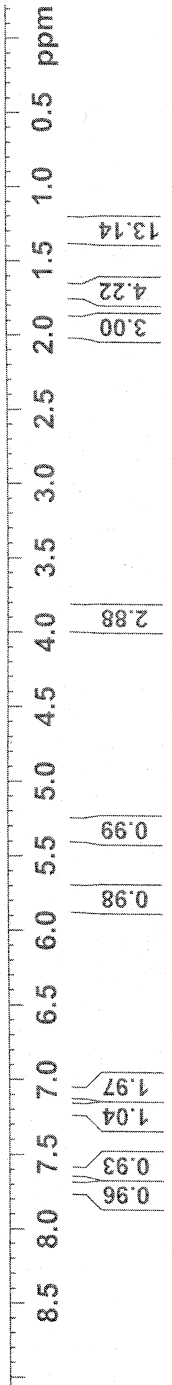

CWII-149

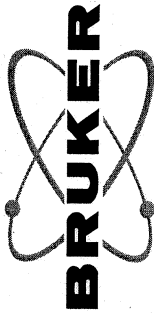

NAME CWII-149  
 EXPNO 2  
 PROCNO 1  
 Date 20090907  
 Time 12.54  
 INSTRUM spect  
 PROBHD 5 mm PABEO BB-  
 PULPROG zgig30  
 TD 65536  
 SOLVENT CDCl3  
 NS 591  
 DS 4  
 SWH 24038.461 Hz  
 FIDRES 0.366798 Hz  
 AQ 1.3631988 sec  
 RG 2050  
 DW 20.800 usec  
 DE 6.50 usec  
 TE 292.0 K  
 D1 2.00000000 sec  
 D11 0.03000000 sec  
 TD0 1

===== CHANNEL f1 =====  
 NUC1 13C  
 P1 8.50 usec  
 PL1 -1.50 dB  
 PL1W 52.51238251 W  
 SFO1 100.6228298 MHz

===== CHANNEL f2 =====  
 CPDPRG2 waltz16  
 NUC2 1H  
 PCPD2 90.00 usec  
 PL2 -4.80 dB  
 PL12 17.28 dB  
 PL2W 21.67079544 W  
 PL12W 0.26783961 W  
 SFO2 400.1316005 MHz  
 SI 32768  
 SF 100.6127744 MHz  
 WDW EM  
 SSB 0  
 LB 1.00 Hz  
 GB 0  
 PC 1.40

166.39  
 147.81  
 145.75  
 144.61  
 142.43  
 137.19  
 132.60  
 132.18  
 131.39  
 130.26  
 128.17  
 128.03  
 125.48  
 121.94  
 117.85  
 77.32  
 77.00  
 76.69  
 52.41  
 35.11  
 35.09  
 33.99  
 33.87  
 31.89  
 31.83  
 20.00

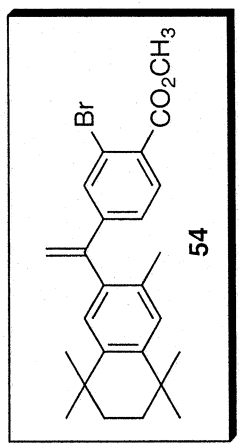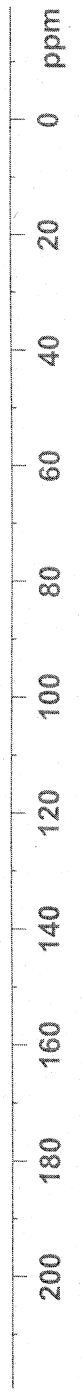

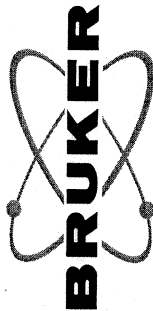

CWII-145  
NAME  
EXPNO 1  
PROCNO 1  
Date 20090702  
Time 13.01  
INSTRUM spect  
PROBHD 5 mm PABBO BB-  
PULPROG zg30  
TD 65536  
SOLVENT CDCl3  
NS 16  
DS 2  
SWH 8223.685 Hz  
FIDRES 0.125483 Hz  
AQ 3.9846387 sec  
RG 4  
DW 60.800 usec  
DE 6.50 usec  
TE 292.1 K  
DI 1.00000000 sec  
TD0 1

==== CHANNEL f1 =====  
NUC1 1H  
P1 10.00 usec  
PL1 -1.80 dB  
PL1W 21.67079544 W  
SFO1 400.1324710 MHz  
SI 32768  
SF 400.1300109 MHz  
WDW EM  
SSB 0  
LB 0.30 Hz  
GB 0  
PC 1.00

CWII-145

7.996  
7.992  
7.735  
7.715  
7.260  
7.222  
7.218  
7.202  
7.197  
7.093  
7.082  
5.780  
5.777  
5.335  
5.333  
3.920  
1.956  
1.698  
1.305  
1.273

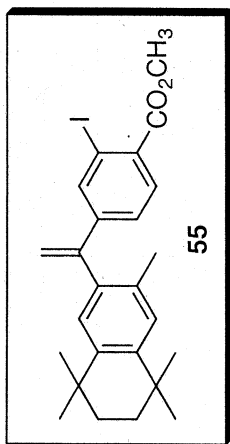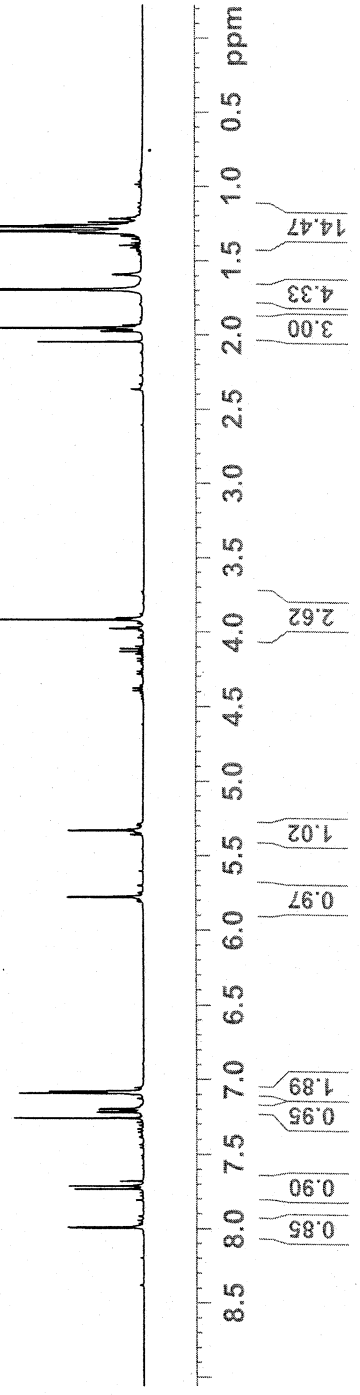

CWII-145

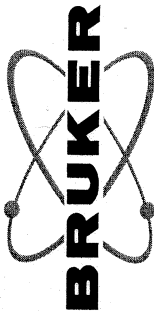

NAME CWII-145  
 EXPNO 2  
 PROCNO 1  
 Date 20090702  
 Time 13.29  
 INSTRUM spect  
 PROBHD 5 mm PABBO BB-  
 PULPROG zgig30  
 TD 65536  
 SOLVENT CDCl3  
 NS 376  
 DS 4  
 SWH 24038.461 Hz  
 FIDRES 0.366798 Hz  
 AQ 1.3631988 sec  
 RG 2050  
 DW 20.800 usec  
 DE 6.50 usec  
 TE 292.4 K  
 D1 2.0000000 sec  
 D11 0.0300000 sec  
 TD0 1

===== CHANNEL f1 =====  
 NUC1 13C  
 P1 8.50 usec  
 PL1 -1.50 dB  
 PLLW 52.51238251 W  
 SFO1 100.6228298 MHz

===== CHANNEL f2 =====  
 CPDPRG2 waltz16  
 NUC2 1H  
 PCPD2 90.00 usec  
 PL2 -1.80 dB  
 PL12 17.28 dB  
 PL2W 21.67079544 W  
 PL12W 0.26783961 W  
 SFO2 400.1316005 MHz  
 SI 32768  
 SF 100.6127744 MHz  
 WDW EM  
 SSB 0  
 LB 1.00 Hz  
 GB 0  
 FC 1.40

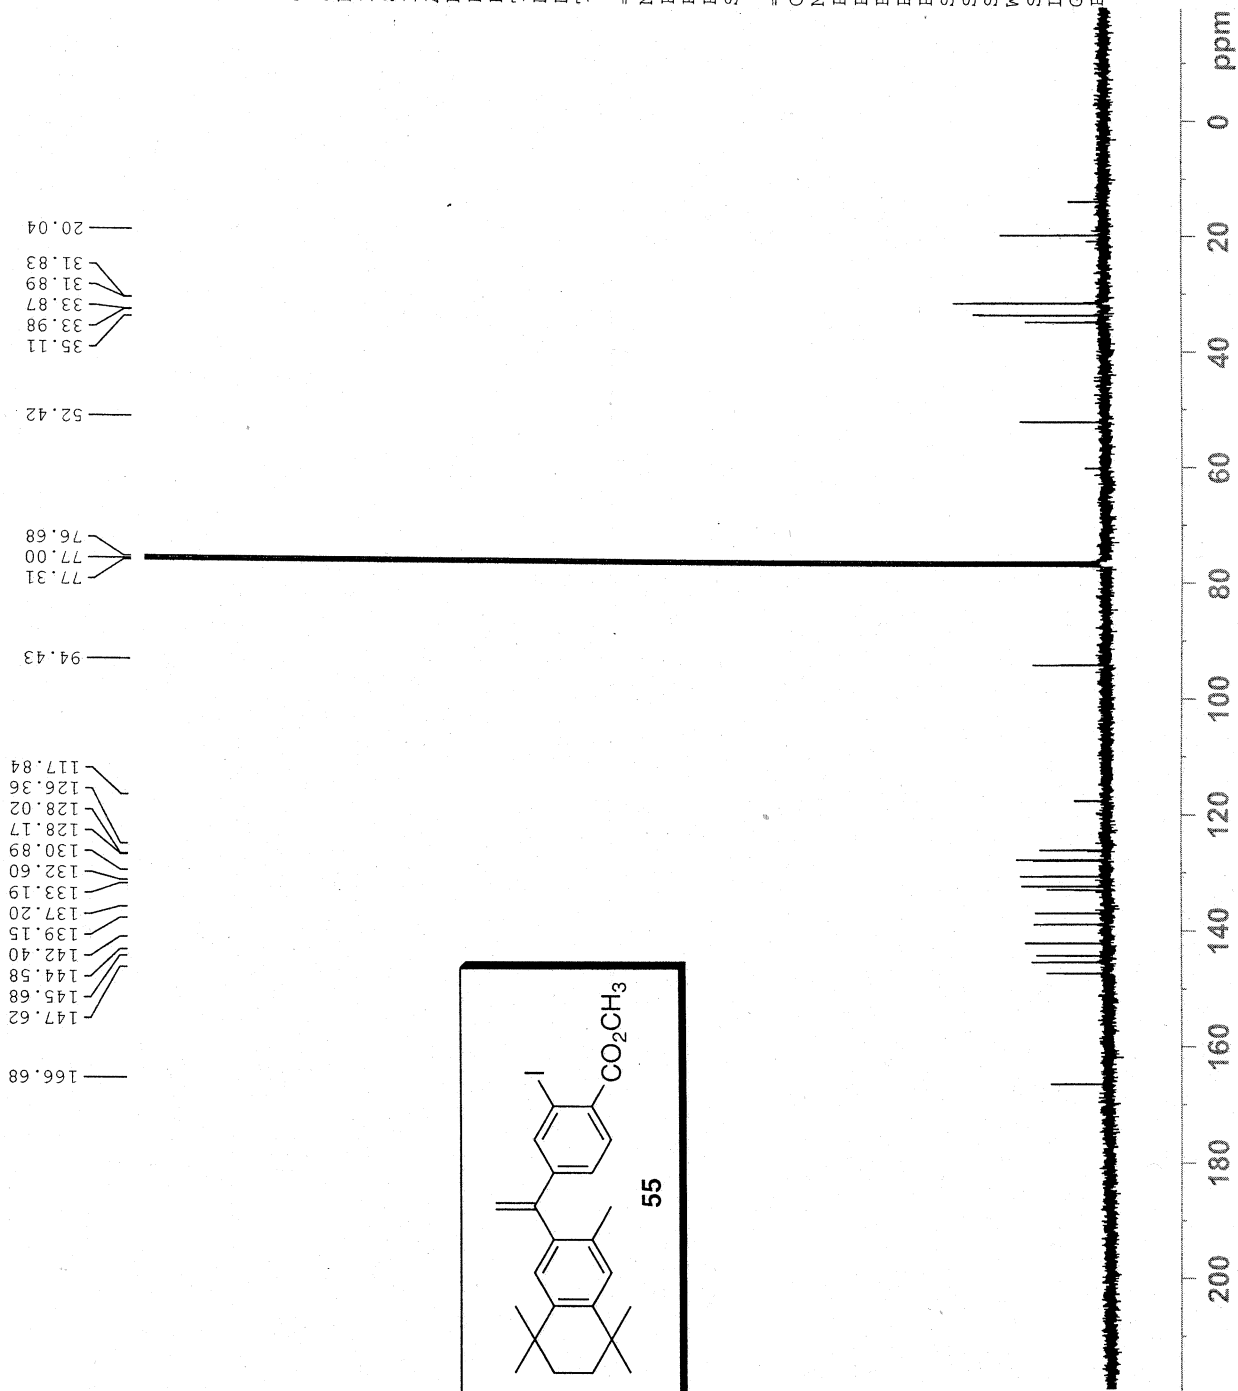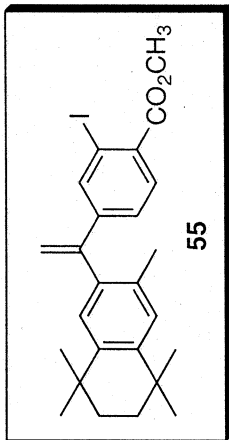

CWIII-085 H-NMR

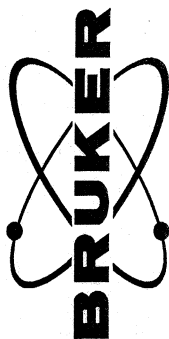

NAME CWIII-085  
 EXPNO 3  
 PROCNO 1  
 Date 20120425  
 Time 17.41  
 INSTRUM spect  
 PROBHD 5 mm PABBO BB-  
 PULPROG zg30  
 TD 65536  
 SOLVENT CDCl3  
 NS 256  
 DS 2  
 SWH 8223.685 Hz  
 FIDRES 0.125483 Hz  
 AQ 3.9846387 sec  
 RG 4  
 DW 60.800 usec  
 DE 6.50 usec  
 TE 292.2 K  
 D1 1.00000000 sec  
 TDO 1

===== CHANNEL f1 =====  
 NUC1 1H  
 P1 14.00 usec  
 PL1 0.50 dB  
 PL1W 12.76071072 W  
 SF01 400.1324710 MHz  
 SI 32768  
 SF 400.1300101 MHz  
 WDW EM  
 SSB 0  
 LB 0.30 Hz  
 GB 0  
 PC 1.00

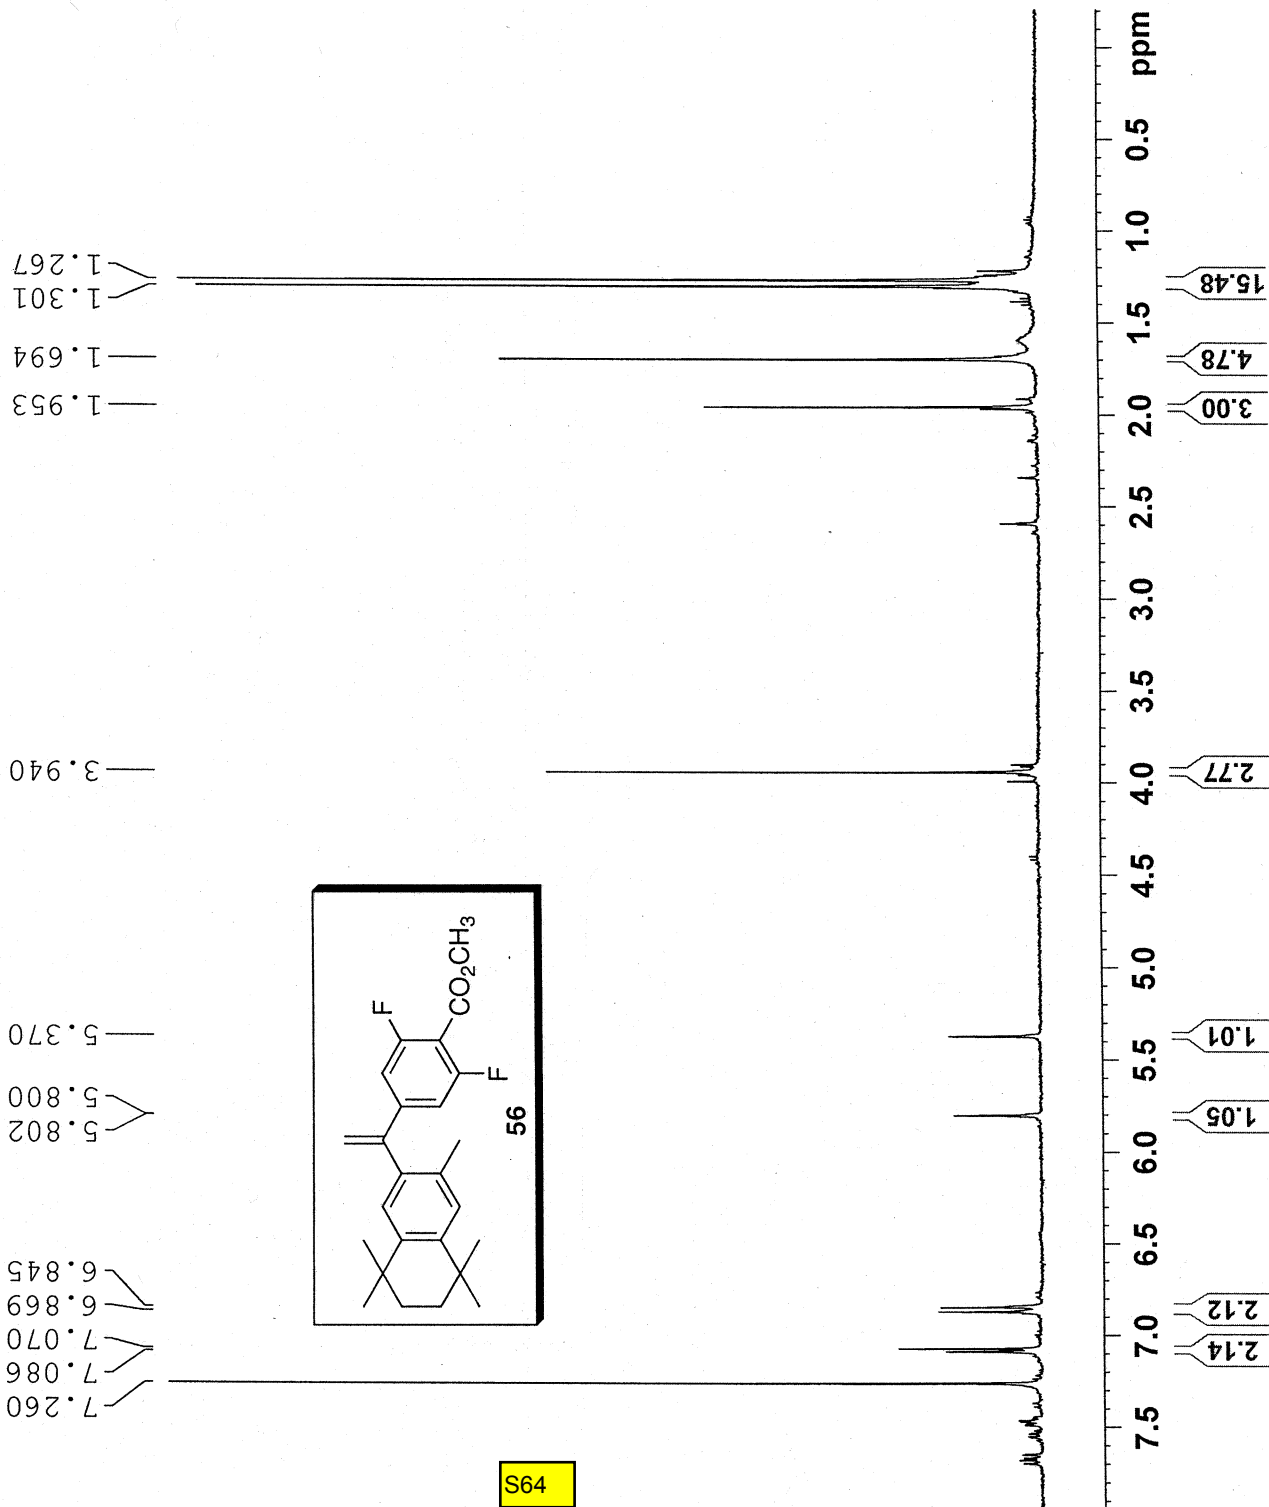

S64



CWIII-085 13C-NMR

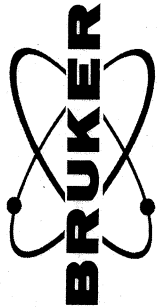

NAME CWIII-085  
 EXPNO 2  
 PROCNO 1  
 Date\_ 20100123  
 Time\_ 12.10  
 INSTRUM spect  
 PROBHD 5 mm PABBO BB-  
 PULPROG zgpg30  
 TD 65536  
 SOLVENT CDCl3  
 NS 300  
 DS 4  
 SWH 24038.461 Hz  
 FIDRES 0.366798 Hz  
 AQ 1.3631988 sec  
 RG 2050  
 DW 20.800 usec  
 DE 6.50 usec  
 TE 291.9 K  
 D1 2.00000000 sec  
 D11 0.03000000 sec  
 TD0 1

===== CHANNEL f1 =====  
 NUC1 13C  
 P1 8.50 usec  
 PL1 -1.50 dB  
 PL1W 52.51238251 W  
 SFO1 100.6228298 MHz

===== CHANNEL f2 =====  
 CPDPRG2 waltz16  
 NUC2 1H  
 PCPD2 90.00 usec  
 PL2 -1.80 dB  
 PL12 17.28 dB  
 PL2W 21.67079544 W  
 PL12W 0.26783961 W  
 SFO2 400.1316005 MHz  
 SI 32768  
 SF 100.6127744 MHz  
 WDM EM  
 SSB 0  
 LB 1.00 Hz  
 GB 0  
 PC 1.40

162.03  
 159.56  
 159.49  
 147.34  
 146.67  
 146.42  
 144.88  
 144.85  
 144.85  
 142.57  
 136.69  
 136.64  
 132.57  
 132.12  
 132.02  
 131.93  
 128.53  
 128.42  
 128.23  
 127.99  
 118.22  
 110.14  
 109.88  
 109.08  
 77.31  
 77.00  
 76.68  
 61.88  
 60.38  
 52.69  
 35.07  
 35.05  
 34.00  
 33.87  
 31.88  
 31.82  
 21.04  
 19.81  
 14.18  
 14.13

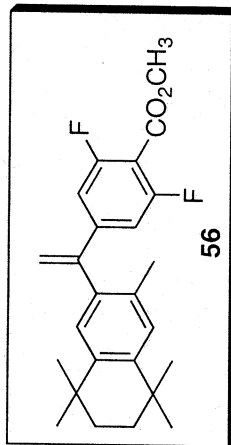

S65

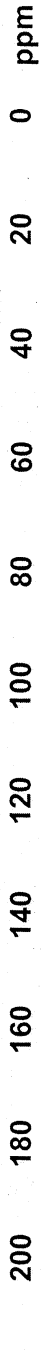

jg-cw-blabk-1 Sm (Mn, 2x3)

TOF MS ES-  
TIC  
2.50e4  
Area

*Comparison with Blank*

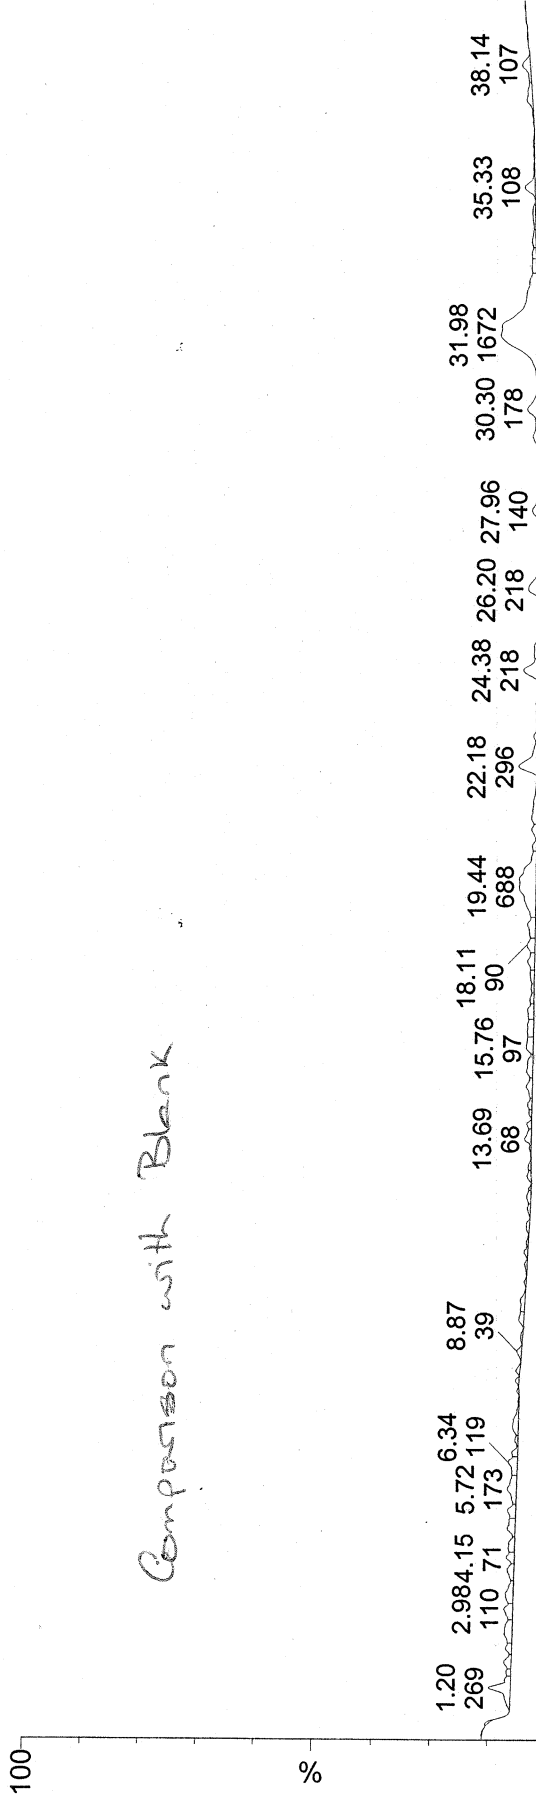

jg-cw-i-39d-1 Sm (Mn, 2x3)

TOF MS ES-  
TIC  
2.50e4  
Area

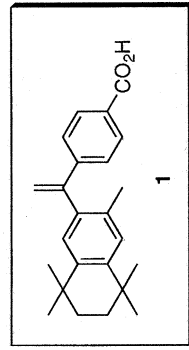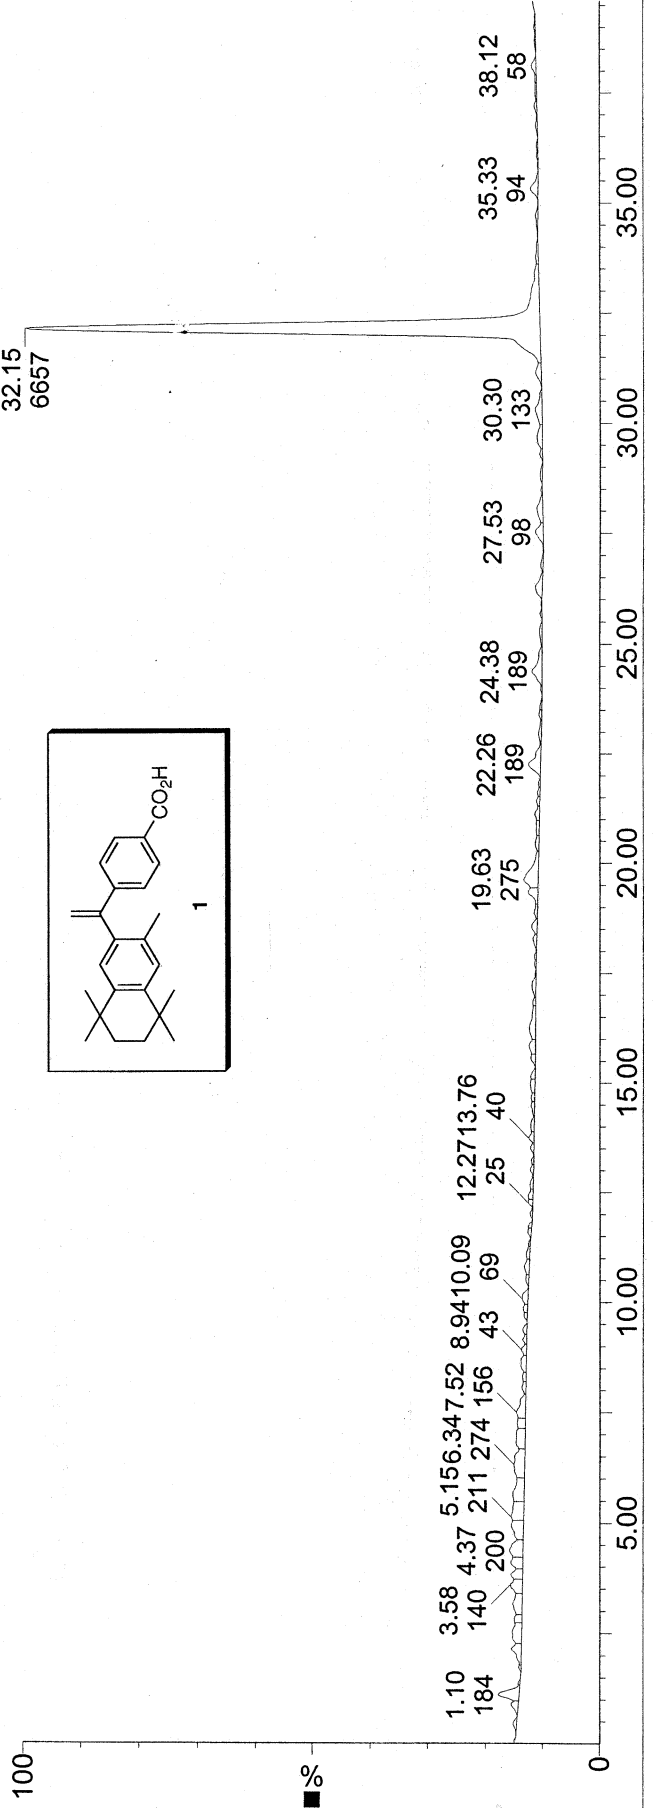

jg-cw-blabk-1 Sm (Mn, 2x3)

TOF MS ES-  
TIC  
1.90e4  
Area

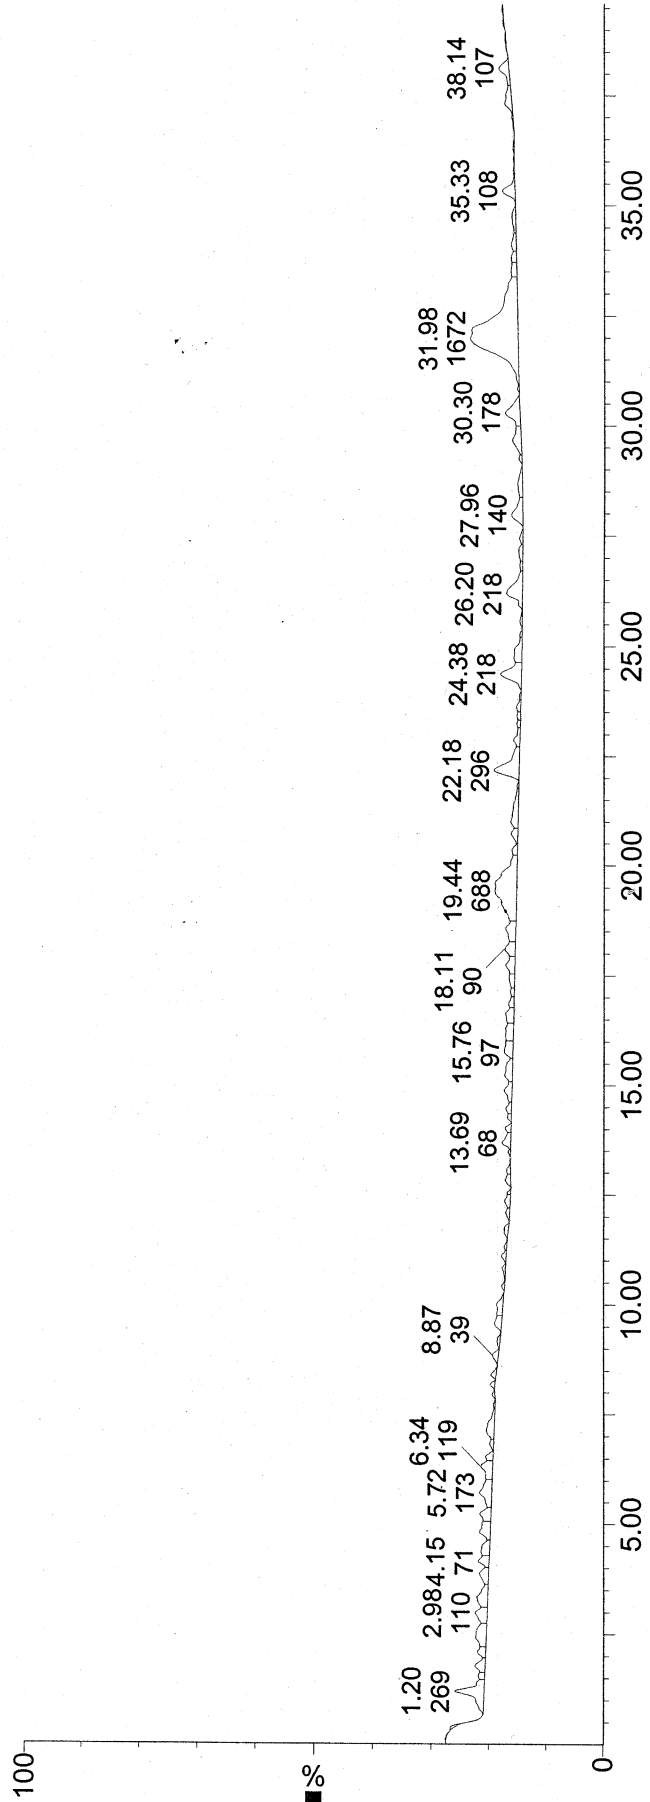

jg-cw-ii-147-1 Sm (Mn, 2x3)

TOF MS ES-  
TIC  
1.90e4  
Area

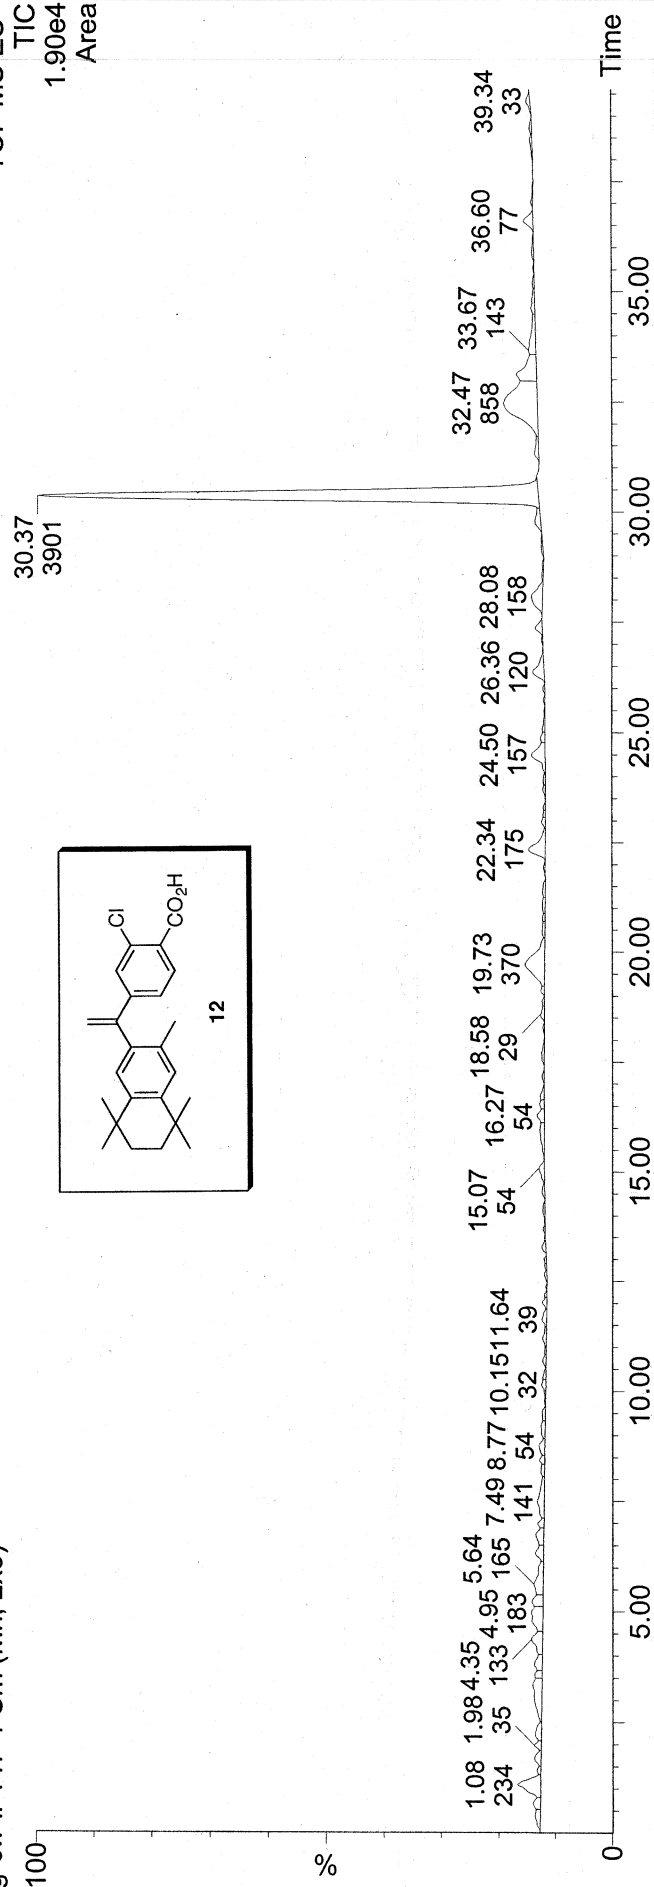

jg-cw-blabk-1 Sm (Mn, 2x3)

TOF MS ES-  
TIC  
4.50e4  
Area

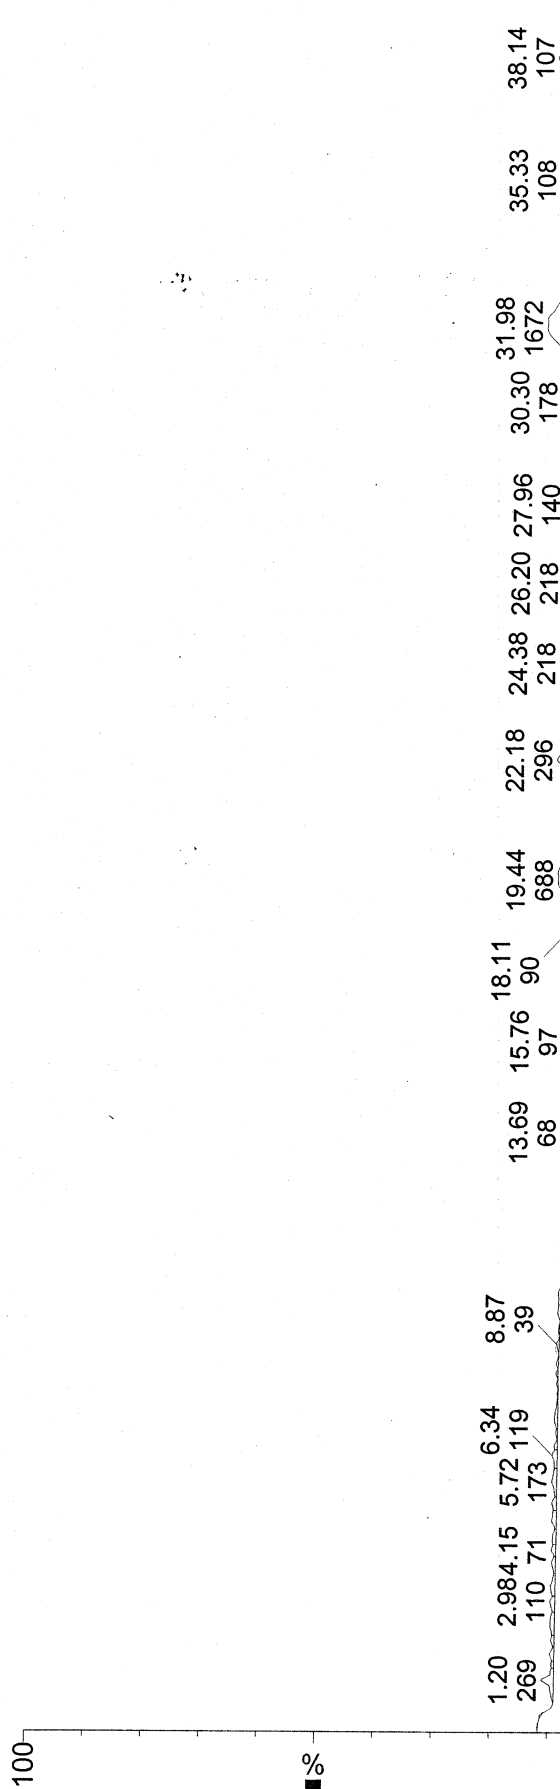

jg-cw-ii-155-1 Sm (Mn, 2x3)

TOF MS ES-  
TIC  
4.50e4  
Area

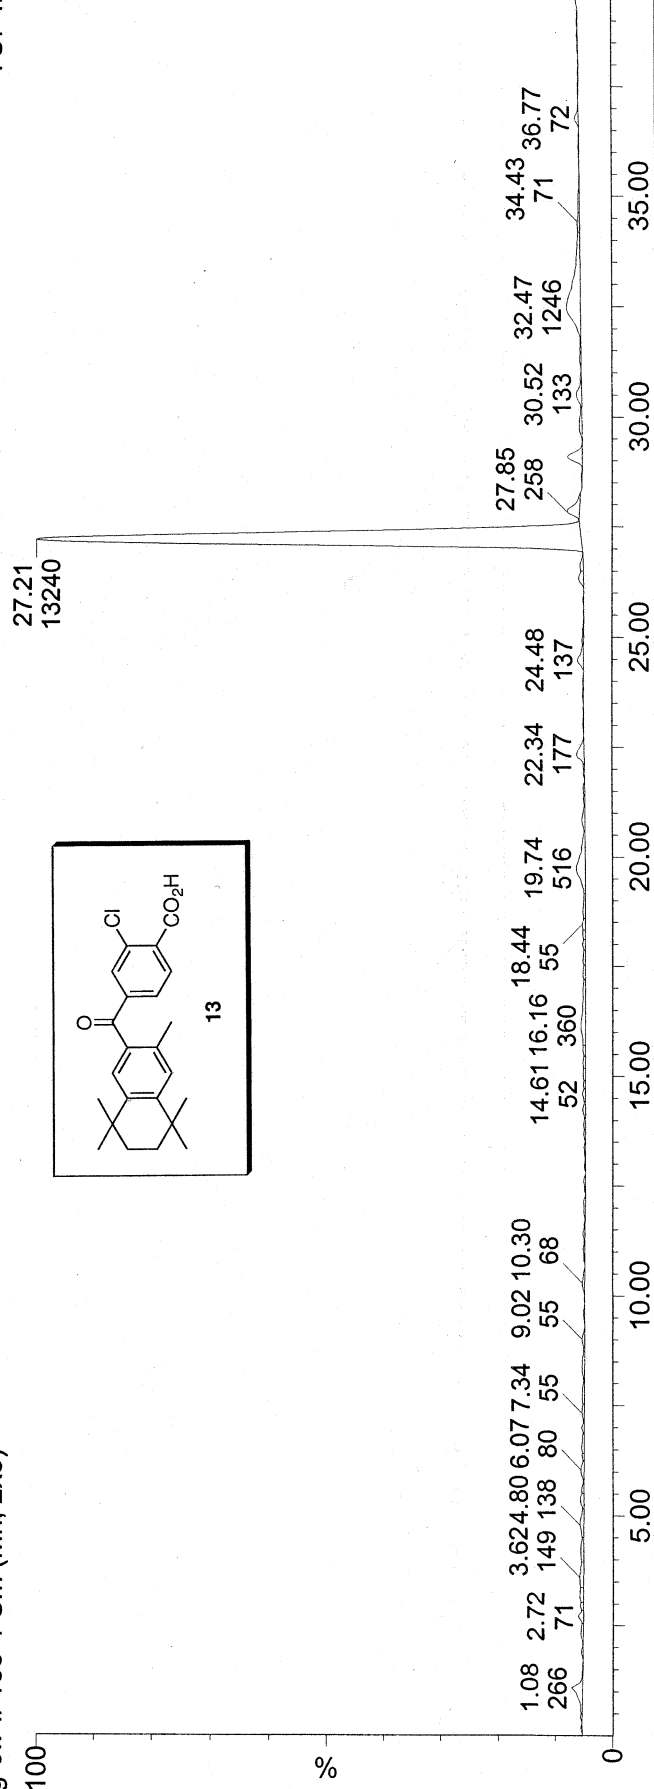

jg-cw-blabk-1 Sm (Mn, 2x3)

TOF MS ES-  
TIC  
1.60e4  
Area

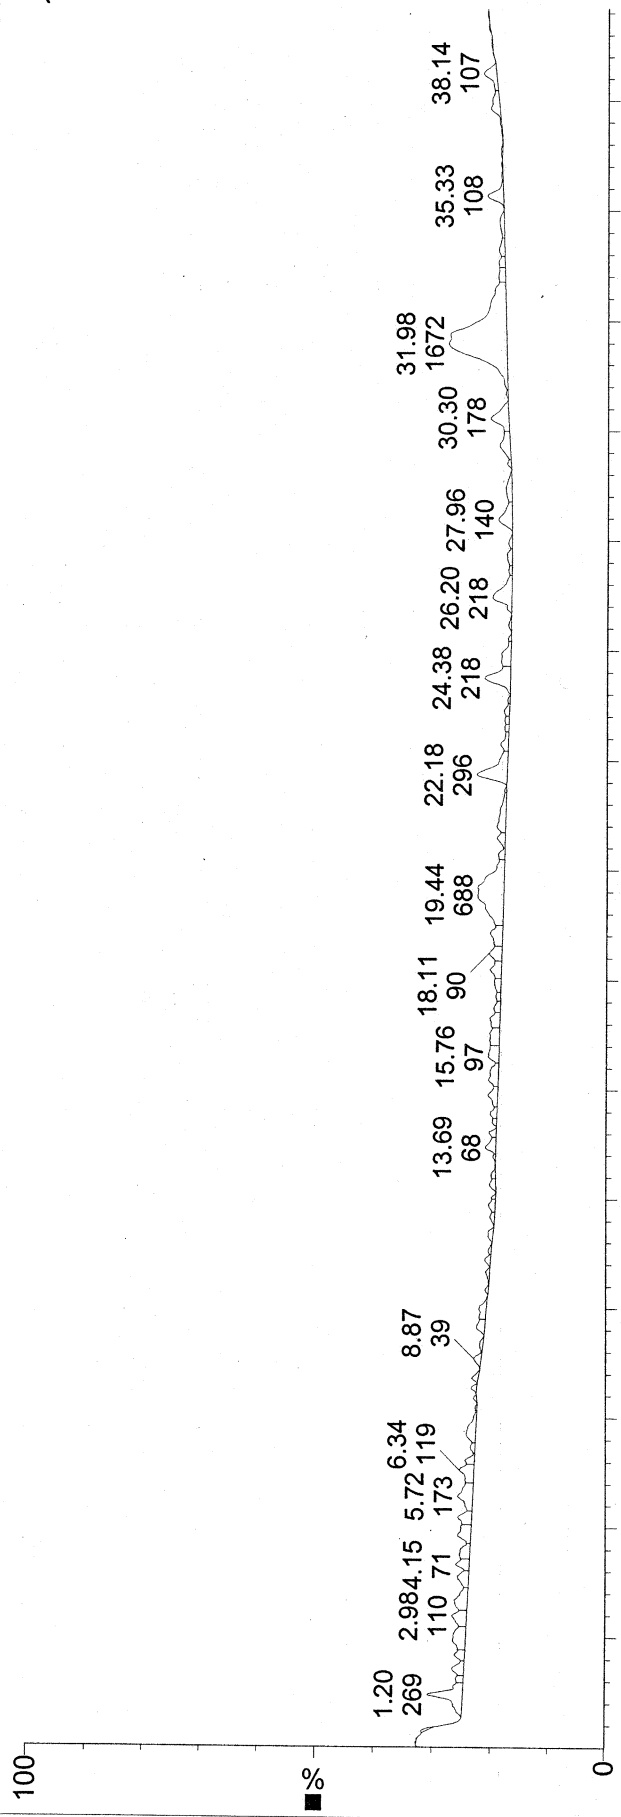

jg-cw-ii-151-1 Sm (Mn, 2x3)

TOF MS ES-  
TIC  
1.60e4  
Area

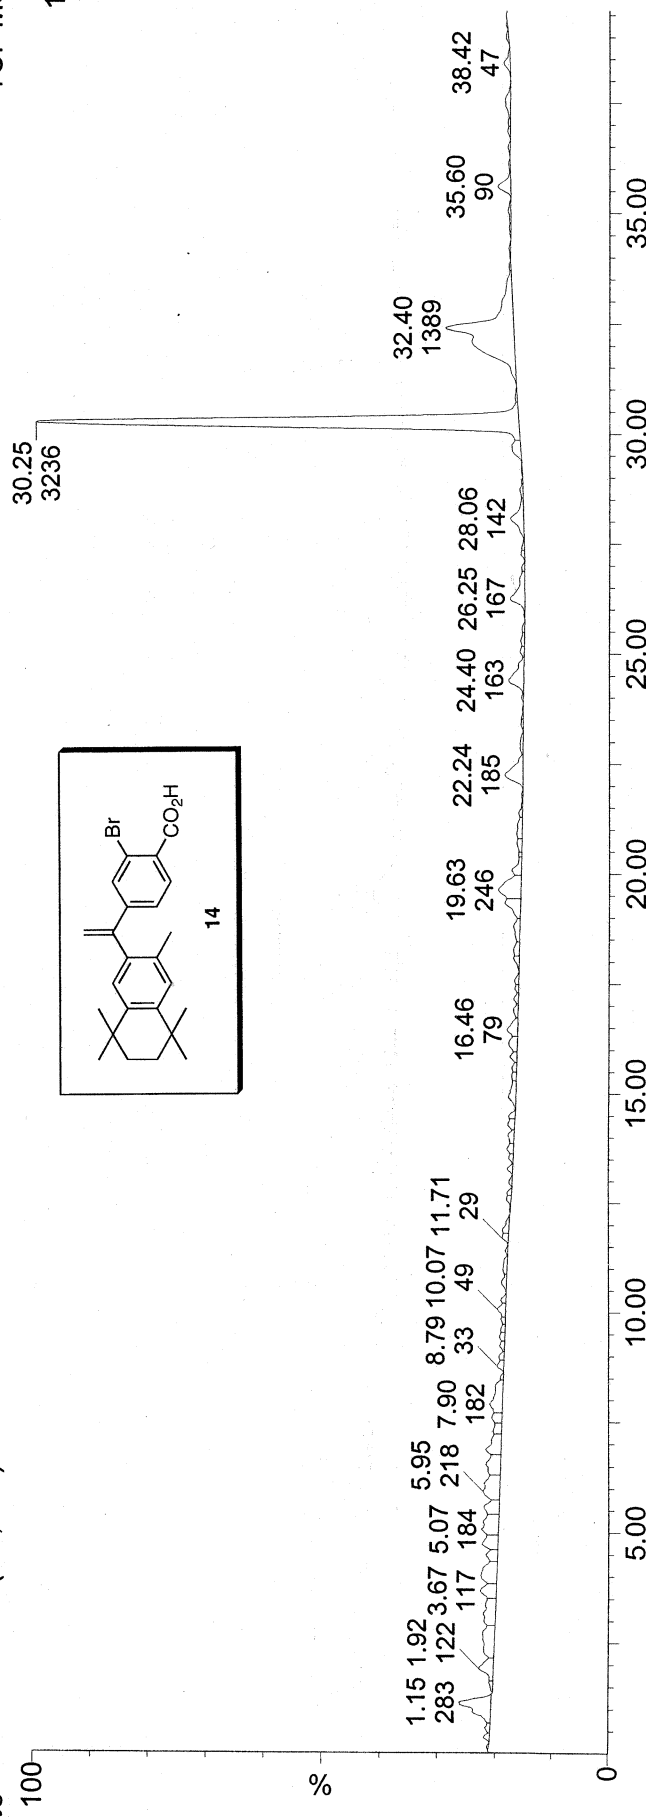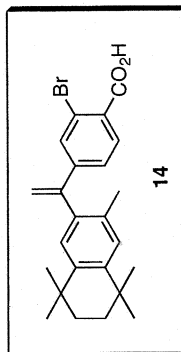

jg-cw-blabk-1 Sm (Mn, 2x3)

TOF MS ES-  
TIC  
3.80e4  
Area

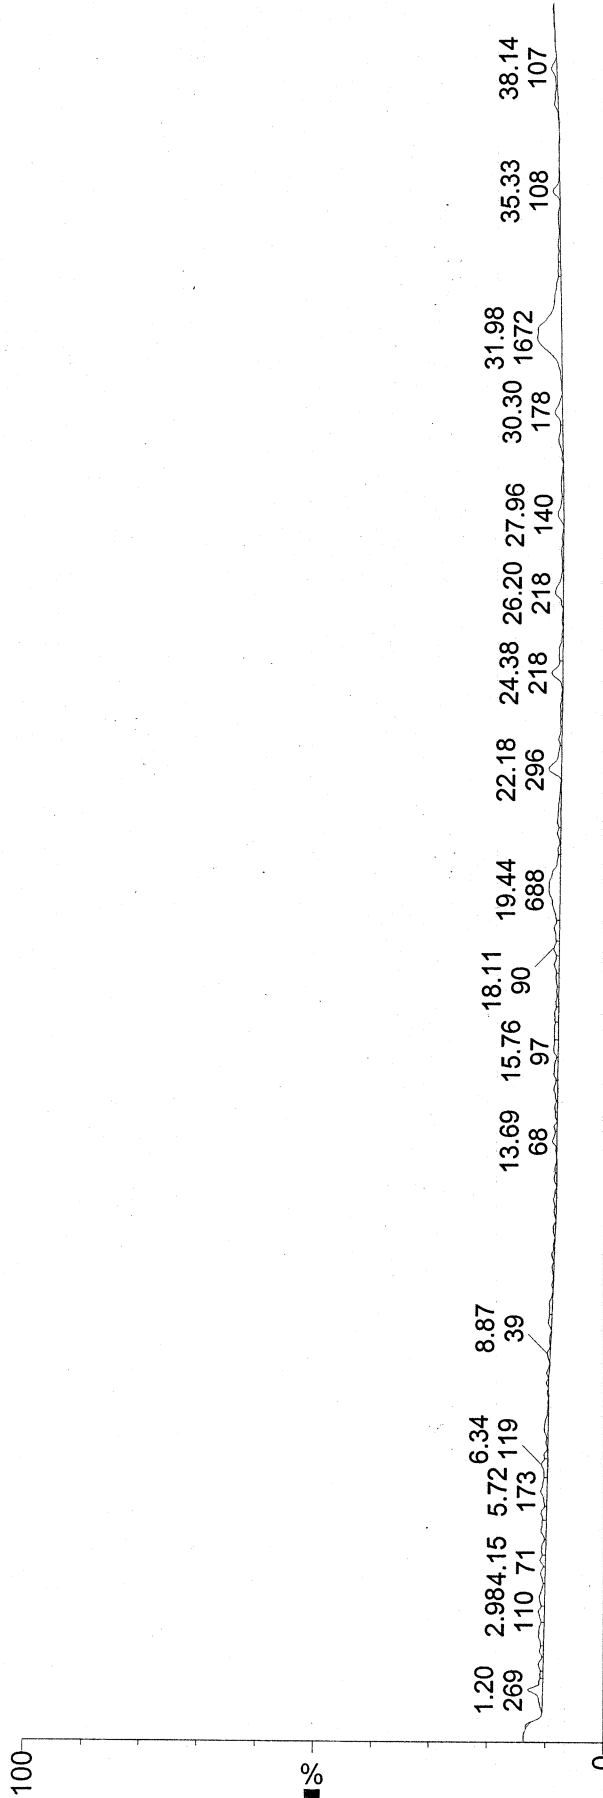

jg-cw-ii-157-1 Sm (Mn, 2x3)

TOF MS ES-  
TIC  
3.80e4  
Area

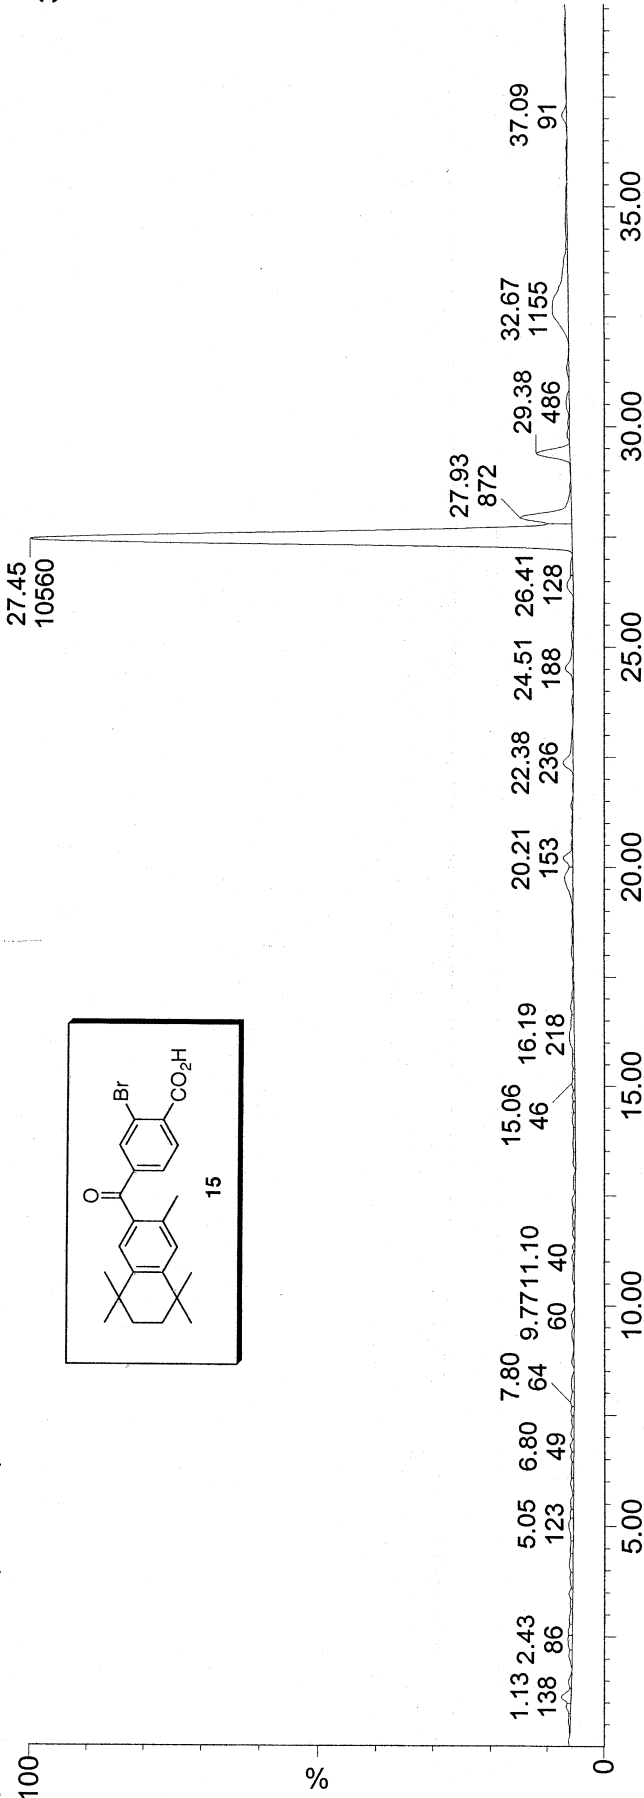

0011-153-2

jg-cw-061912-cwii-153-2-1 Sm (Mn, 2x3)

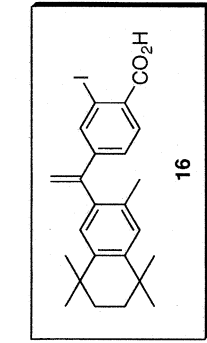

TOF MS ES-  
TIC  
2.02e4  
Area

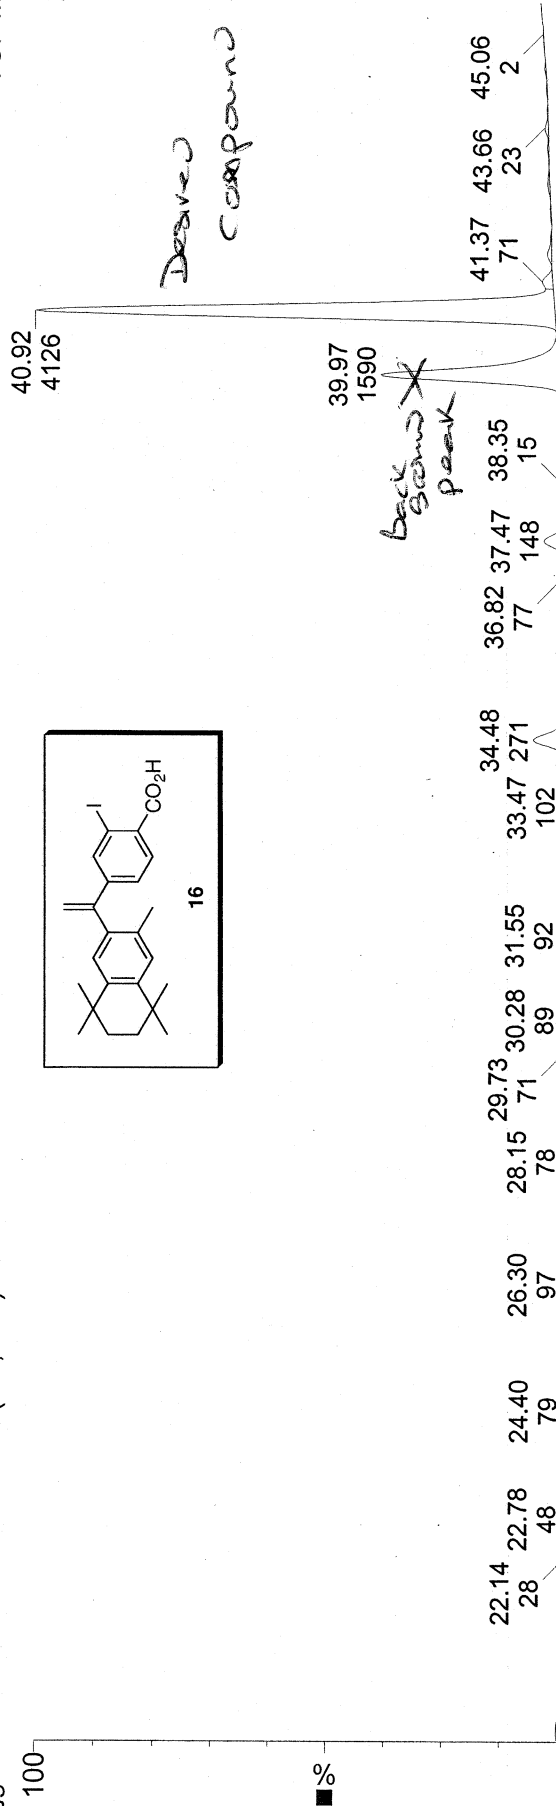

jg-cw-061912-blk-1 Sm (Mn, 2x3)

TOF MS ES-  
TIC  
1.19e4  
Area

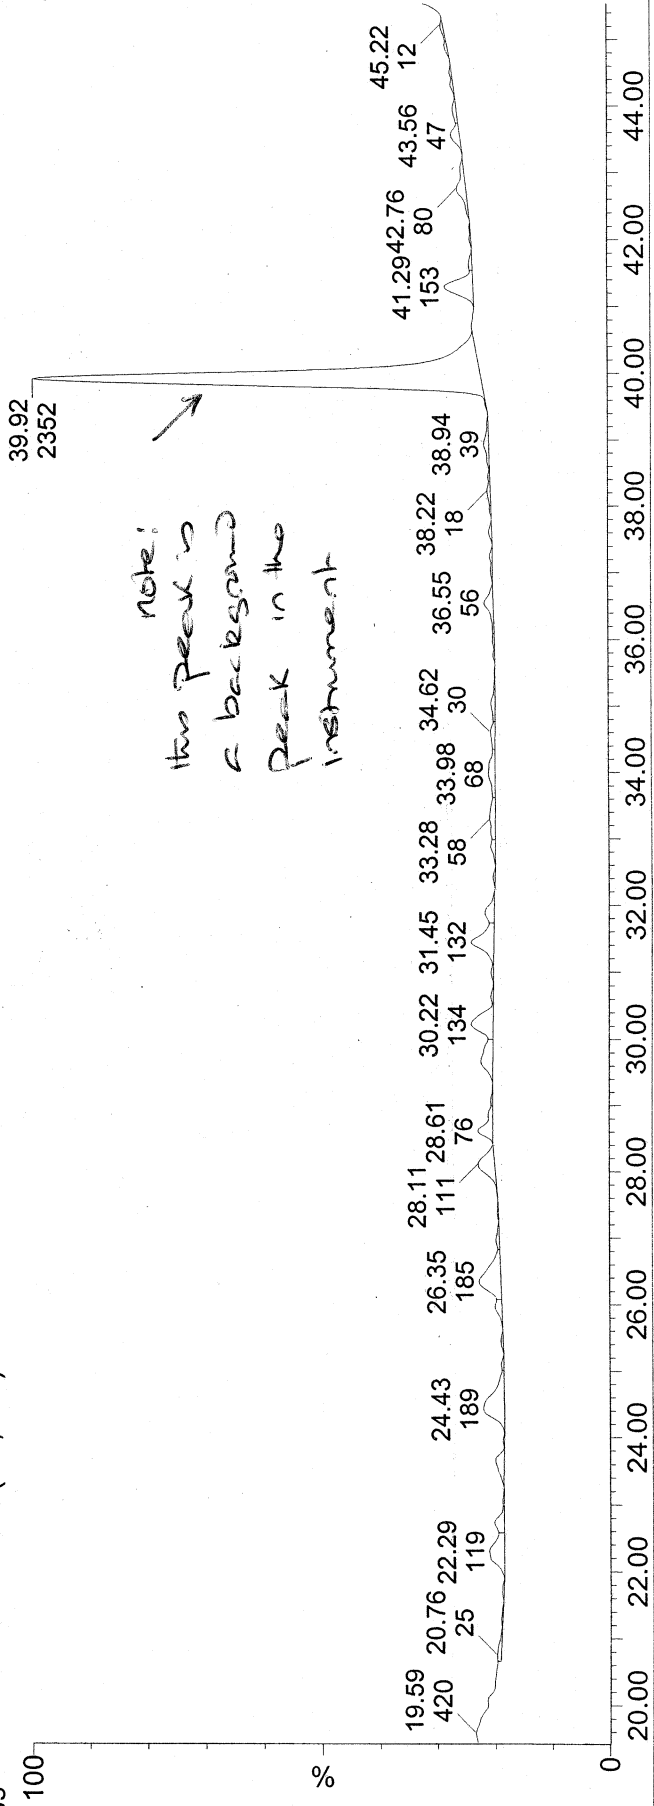

C-2011-15A -1

jg-cw-060812-cwii-159-1-1 Sm (Mn, 2x3)

TOF MS ES-  
TIC  
1.51e4  
Area

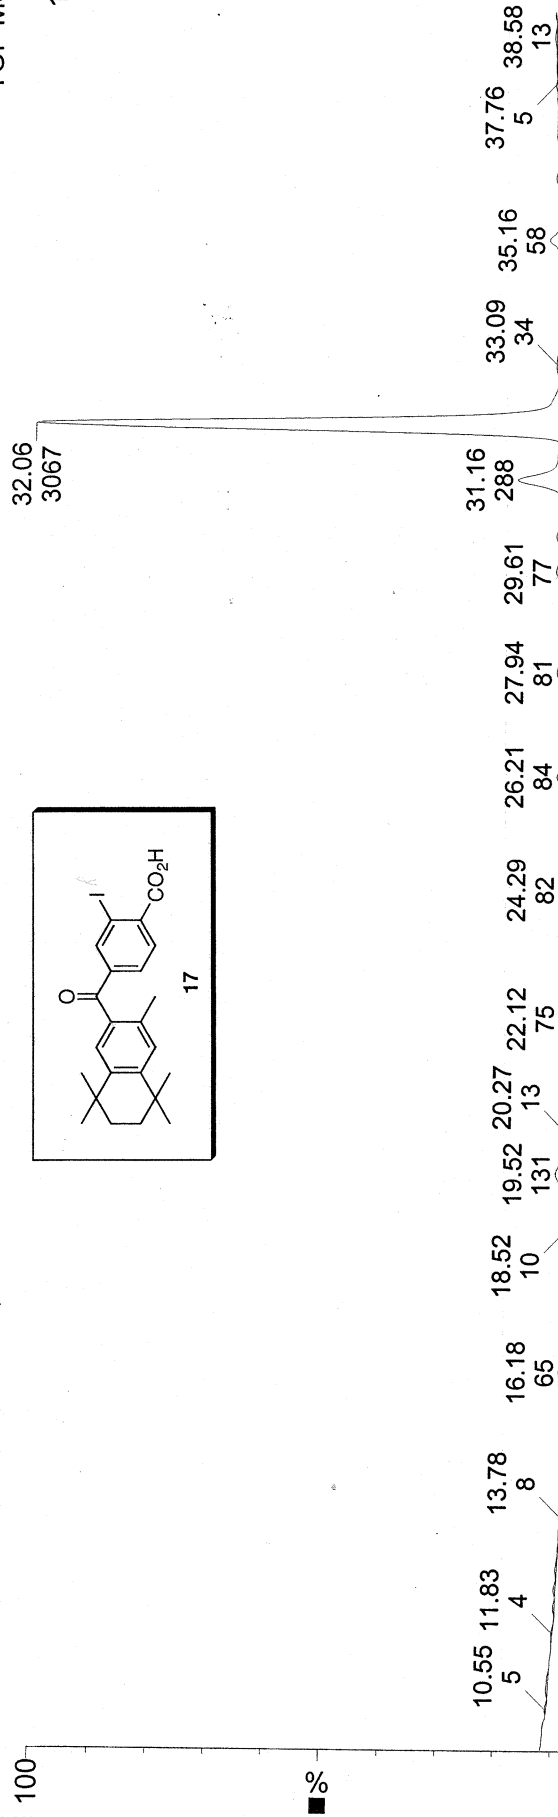

jg-cw-060812-blnc-1 Sm (Mn, 2x3)

TOF MS ES-  
TIC  
1.51e4  
Area

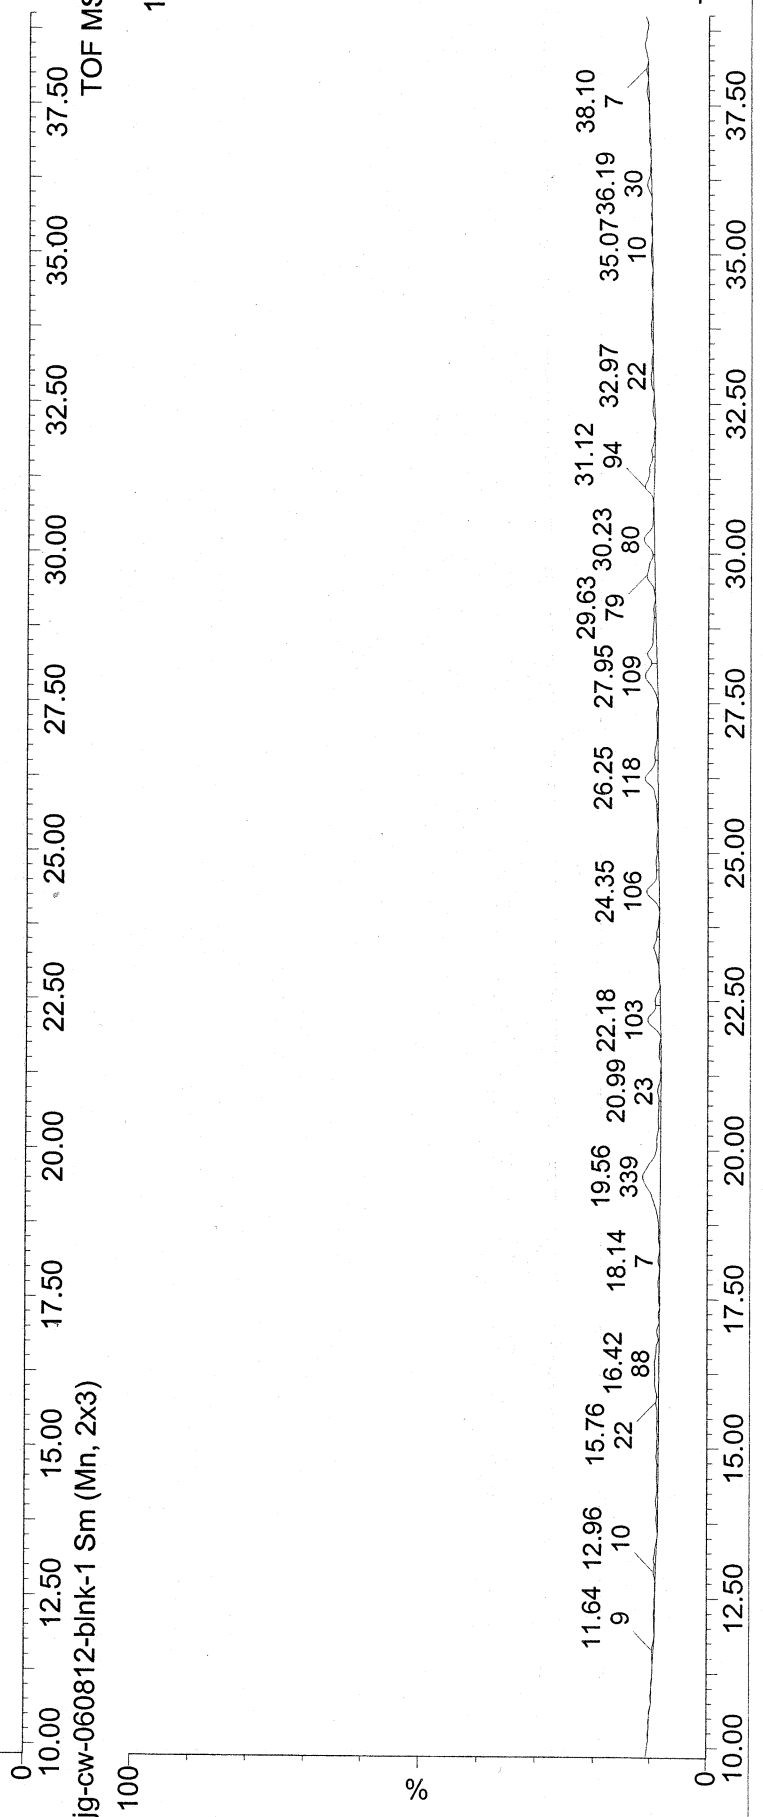



jg-cw-blabk-1 Sm (Mn, 2x3)

TOF MS ES-  
TIC  
1.33e4  
Area

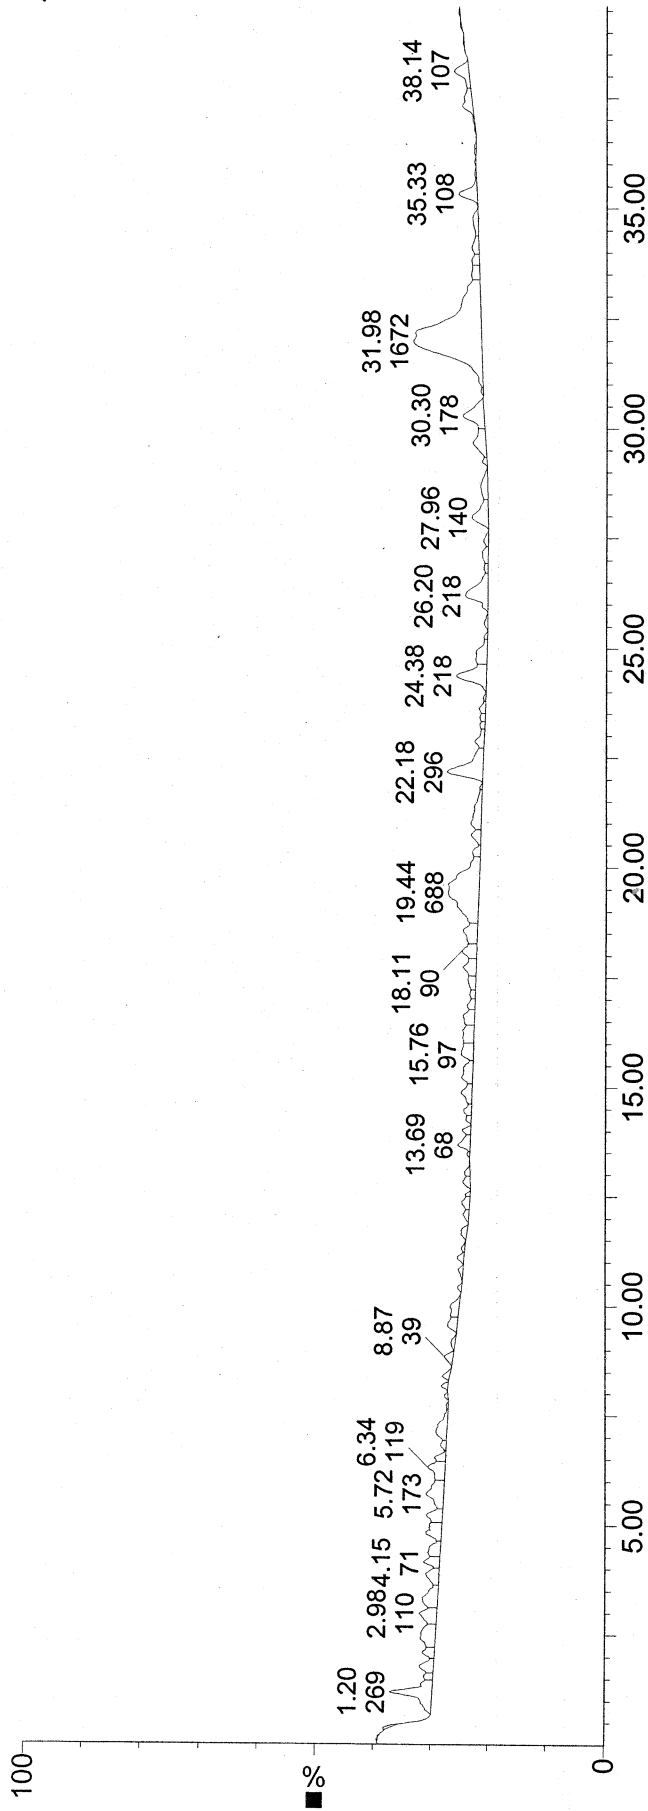

jg-cw-iii-087-1 Sm (Mn, 2x3)

TOF MS ES-  
TIC  
1.33e4  
Area

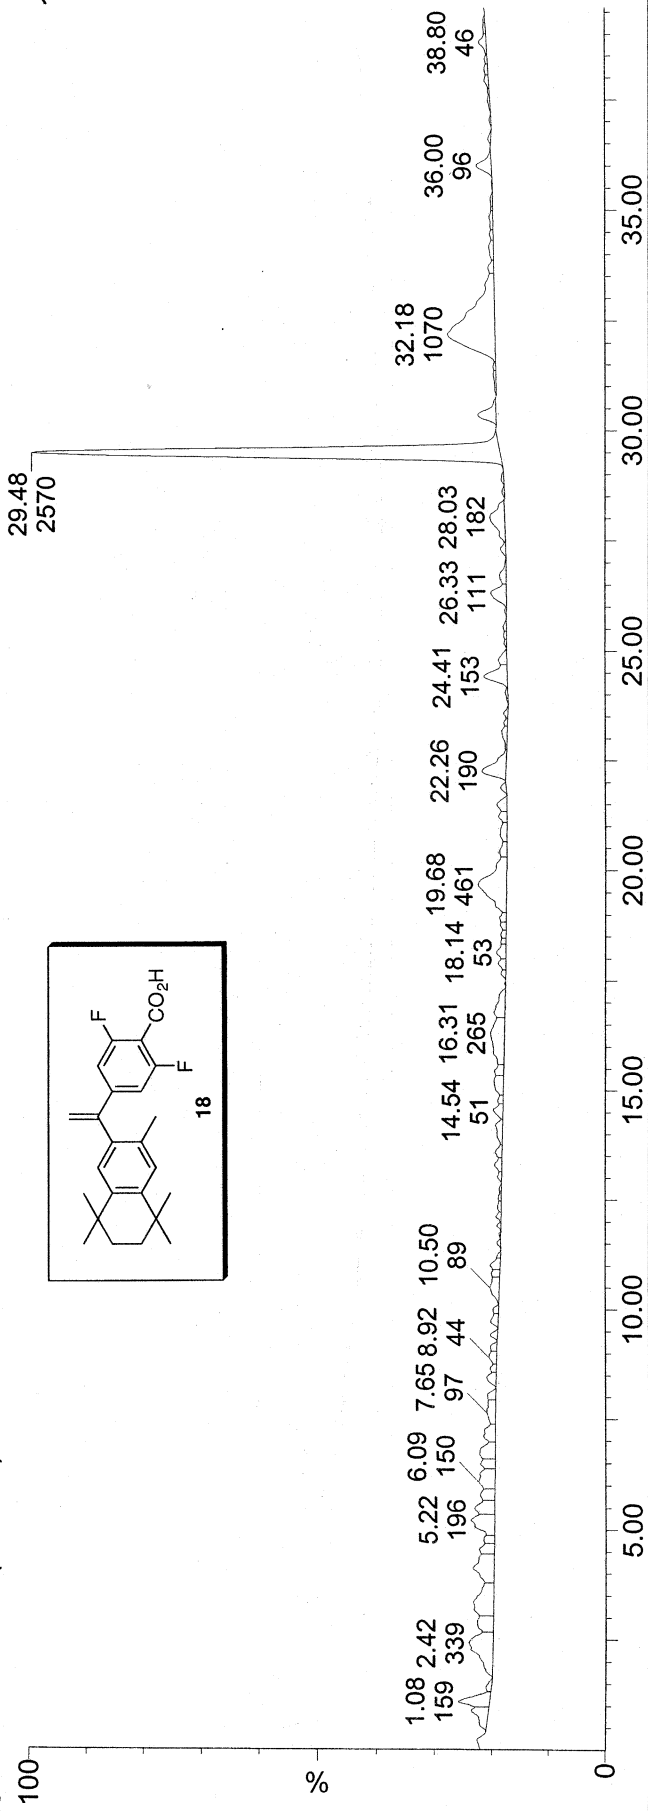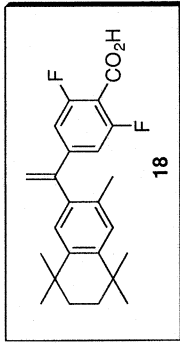

Case IV - 89

jg-cw-061912-cwiv-89-1 Sm (Mn, 2x3)

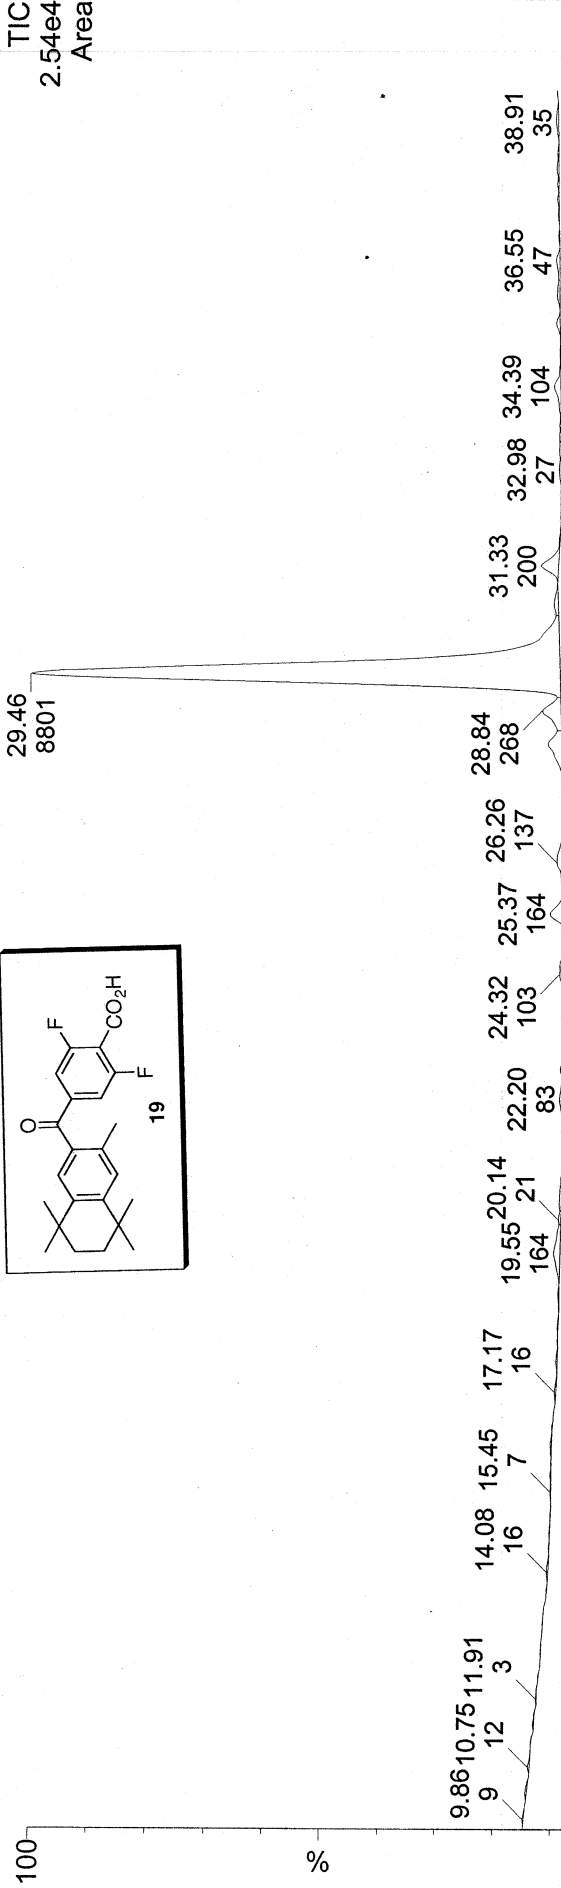

jg-cw-061912-blnc-1 Sm (Mn, 2x3)

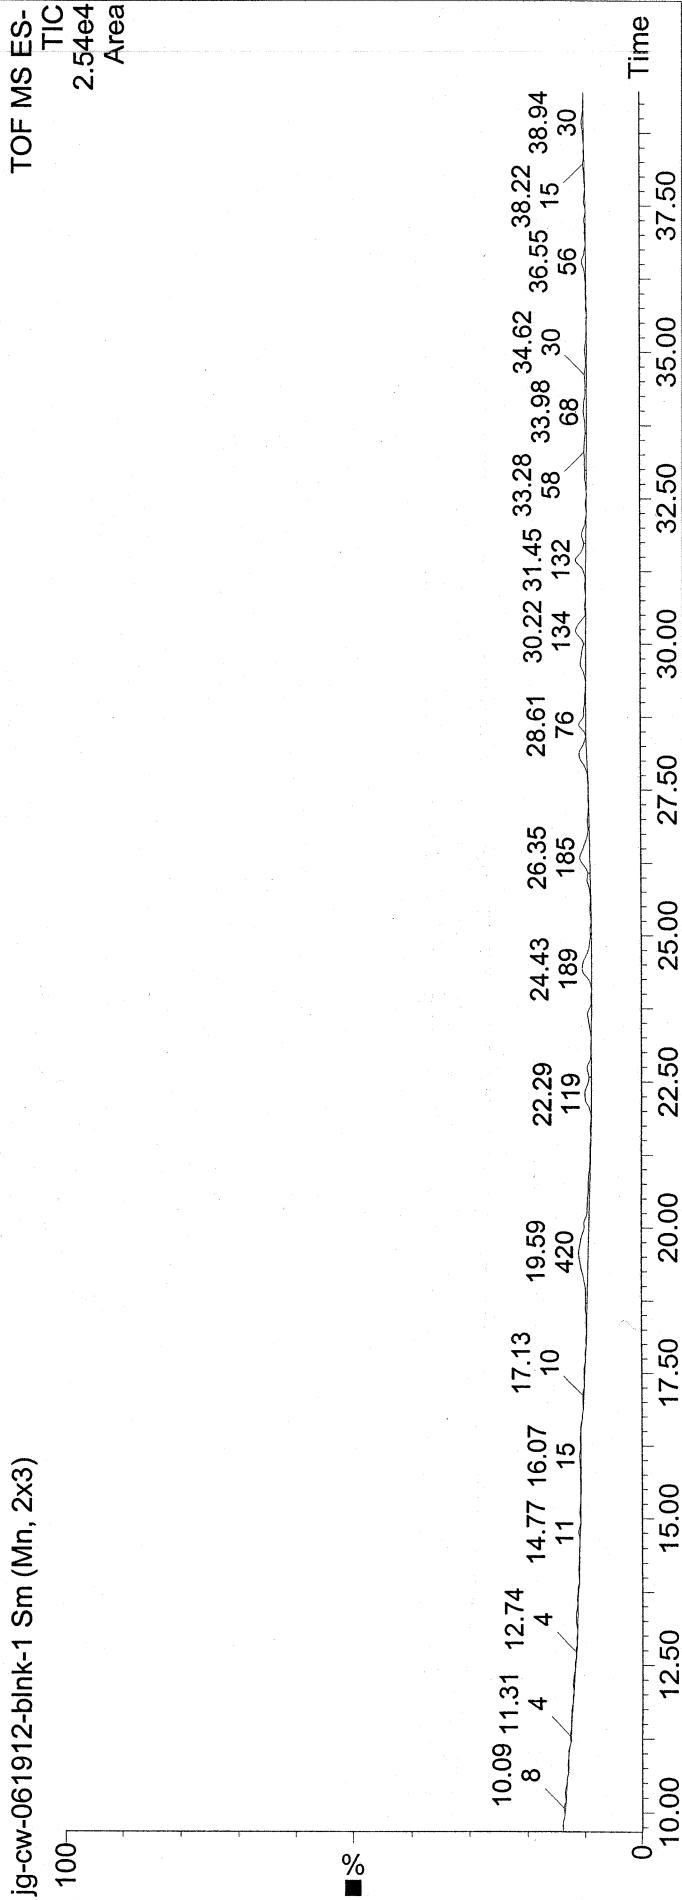

jg-cw-blabk-1 Sm (Mn, 2x3)

TOF MS ES-  
TIC  
3.00e4  
Area

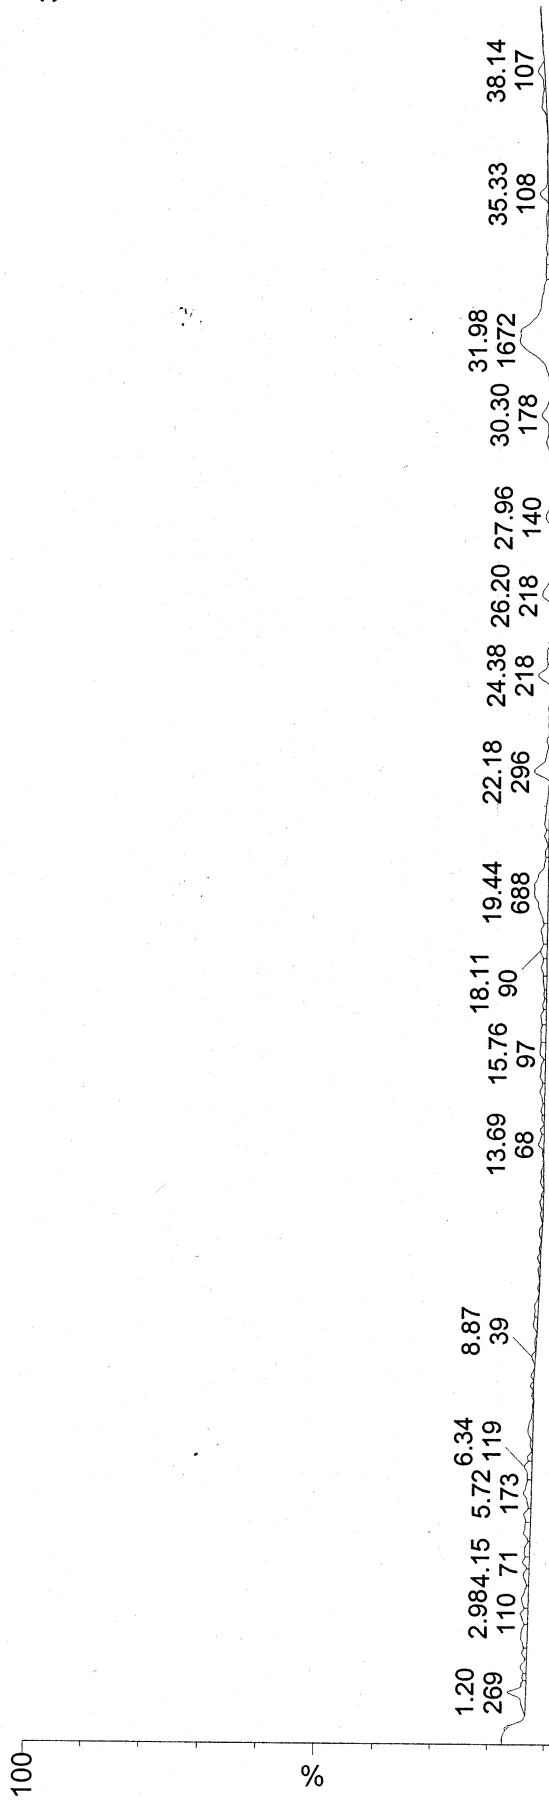

jg-cw-ii-069-1 Sm (Mn, 2x3)

TOF MS ES-  
TIC  
3.00e4  
Area

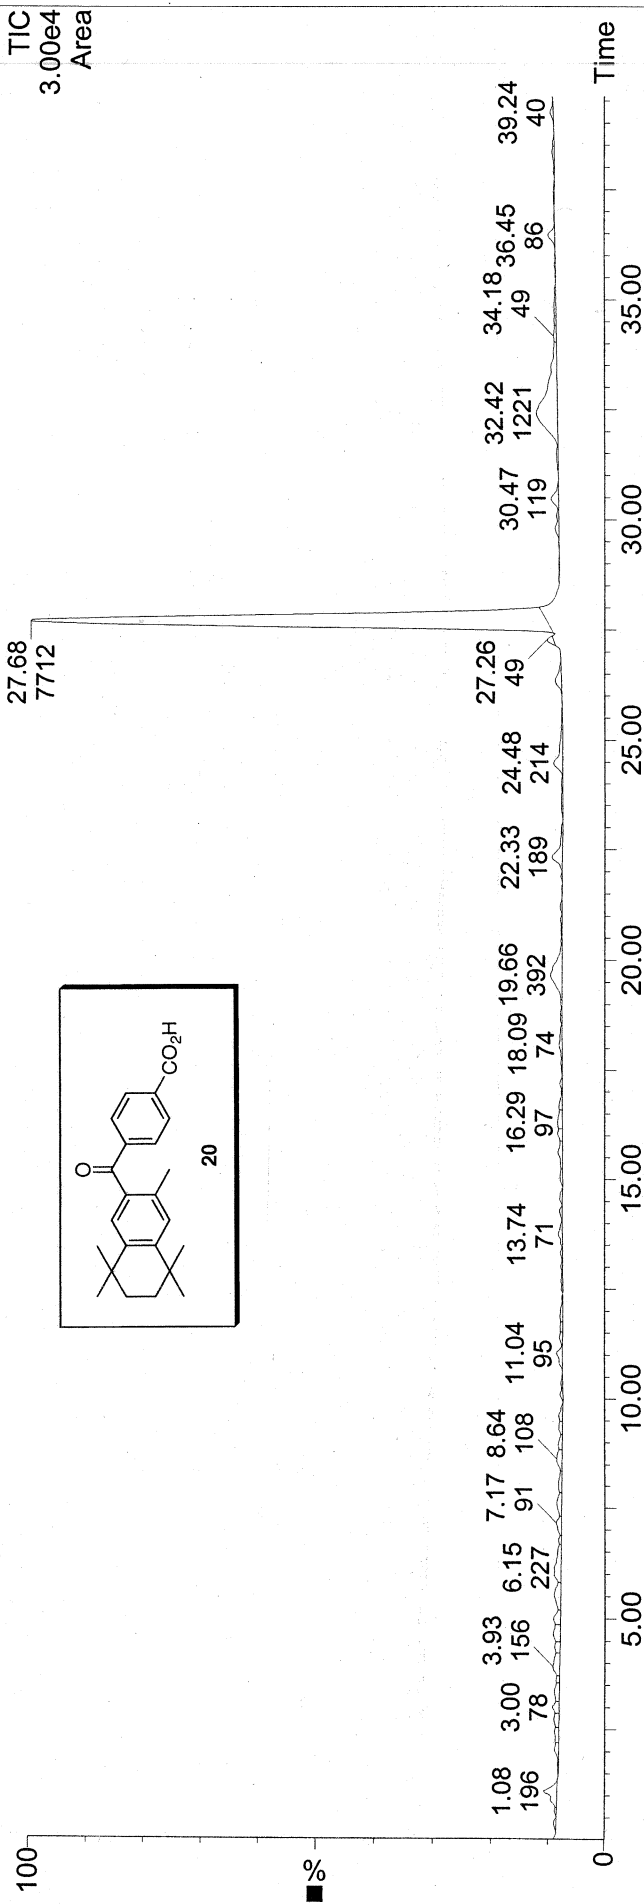

Supplement: NIHMS408650-supplement-Supporting_Information.pdf [file NIHMS408650-supplement-Supporting_Information.pdf]
